# Supplementary material for: Global impacts of nitrogen and phosphorus fertiliser use for major crops on aquatic biodiversity
Source: Springer Nature journal article supplement (doi:10.1007/s11367-022-02078-1), 2022-08-01
Supplement: MOESM3 [file 23386342]

## Sheet: Cover Sheet
Cover Sheet
		Global Aquatic Biodiversity Impact of Nitrogen and Phosphorus Fertiliser Use for Major Crops
Global and Country level Data for the paper:		Mark A. A. Jwaideh1*, Edwin H. Sutanudjaja2, and Carole Dalin1 1Institute for Sustainable Resources, University College London, United Kingdom 2Department of Physical Geography, Faculty of Geosciences, Utrecht University, Utrecht, the Netherlands *Corresponding author's contact information:
Sheets	Name
1	Crop Global Totals and Intensities
2	Barley Country Level
3	Cassava Country Level
4	Cotton Country Level
5	Groundnut Country Level
6	Maize Country Level
7	Oilplam Country Level
8	Potato Country Level
9	Rapeseed Country Level
10	Rice Country Level
11	Rye Country Level
12	Sorghum Country Level
13	Soybean Country Level
14	Sugarbeet Country Level
15	Sugarcane Country Level
16	Sunflower Country Level
17	Wheat Country Level

## Sheet: Global_Totals_&_Intensities
Crop Type	Dry Production	Crop Area	Fertiliser Input N&P			Nutrient Loading to Aquatic Receptors			Aquatic Species Richness Impact Freshwater and Marine			N Input			N Load Freshwater			N Load Marine			N Marine Demersal Species Richness impact			P Input			P Load Freshwater			P Freshwater Fish Species Richness impact
	per grid cell		Per Tonne Crop	Per Hectare	Total	Per Tonne Crop	Per Hectare	Total	Per Tonne Crop	Per Hectare	Total	Per Tonne Crop	Per Hectare	Total	Per Tonne Crop	Per Hectare	Total	Per Tonne Crop	Per Hectare	Total	Per Tonne Crop	Per Hectare	Total	Per Tonne Crop	Per Hectare	Total	Per Tonne Crop	Per Hectare	Total	Per Tonne Crop	Per Hectare	Total
	Tonne	ha	kg/tonne crop	kg/ha	kg	kg/tonne crop	kg/ha	kg	PDF.yr/tonne crop	PDF.yr/ha	PDF.yr	kg/tonne crop	kg/ha	kg	kg/tonne crop	kg/ha	kg	kg/tonne crop	kg/ha	kg	PDF.yr/tonne crop	PDF.yr/ha	PDF.yr	kg/tonne crop	kg/ha	kg	kg/tonne crop	kg/ha	kg	PDF.yr/tonne crop	PDF.yr/ha	PDF.yr
Barley	116649696	53360996	41.5884	90.9142	4851269632	0.112184	0.245241	13086279	8.95506e-13	1.95762e-12	0.000104461	35.3632	77.3056	4125105920	0.112236	0.245354	13092327	0.0887353	0.19398	10350940	1.56909e-12	3.4301e-12	0.000183034	6.22516	13.6085	726163584	0.0234492	0.051261	2.73534e+06	2.21924e-13	4.85135e-13	2.58873e-05
Cassava	51363948	14981710	12.8001	43.8843	657461888	0.0455535	0.156178	2.33981e+06	2.60318e-13	8.92484e-13	1.33709e-05	10.2681	35.2038	527412672	0.0144149	0.0494206	740405	0.0408821	0.140162	2.09987e+06	2.4749e-13	8.48504e-13	1.2712e-05	2.53192	8.68053	130049240	0.00467145	0.0160158	239944	2.73146e-13	9.36464e-13	1.40298e-05
Cotton	47006280	29831820	96.3654	151.844	4529776640	0.106765	0.16823	5.0186e+06	7.11737e-13	1.12149e-12	3.34561e-05	81.6761	128.698	3839289344	0.122363	0.192809	5751832	0.0892524	0.140636	4195424	8.69905e-13	1.37072e-12	4.0891e-05	14.6893	23.146	690487424	0.0175121	0.027594	823180	5.53568e-13	8.72262e-13	2.60212e-05
Groundnut	29572760	21772082	67.7061	91.9644	2002256256	0.0772184	0.104885	2283561	9.32292e-13	1.26632e-12	2.75704e-05	52.4604	71.2563	1551398912	0.0422638	0.0574065	1249858	0.0617713	0.0839032	1.82675e+06	1.22301e-12	1.6612e-12	3.61677e-05	15.2457	20.708	450857344	0.0154471	0.0209816	456813	6.41576e-13	8.71446e-13	1.89732e-05
Maize	522261728	133627408	39.5176	154.448	20638527488	0.11698	0.457198	61094136	6.08374e-13	2.37773e-12	0.00031773	34.2962	134.041	17911601152	0.10729	0.419325	56033272	0.102991	0.402526	53788480	8.13766e-13	3.18048e-12	0.000424999	5.22138	20.4069	2726926336	0.0139885	0.0546718	7305655	4.02981e-13	1.57499e-12	0.000210462
Millet	21438772	32978524	72.4268	47.0834	1552740992	0.065981	0.0428931	1.41455e+06	4.17108e-13	2.71155e-13	8.94229e-06	59.0011	38.3556	1264910848	0.085206	0.0553909	1.82671e+06	0.0437565	0.0284453	938085	5.14746e-13	3.34627e-13	1.10355e-05	13.4257	8.7278	287830112	0.0222245	0.0144478	476466	3.19471e-13	2.07682e-13	6.84906e-06
Oilplam	110245200	9386125	7.69685	90.4037	848540480	0.0195722	0.229886	2.15774e+06	3.92205e-14	4.60667e-13	4.32388e-06	6.63496	77.9313	731472640	0.00215685	0.0253334	237783	0.0187026	0.219673	2.06188e+06	4.33007e-14	5.0859e-13	4.77369e-06	1.06189	12.4724	117067856	0.000869571	0.0102136	95866	3.51404e-14	4.12743e-13	3.87406e-06
Potato	63545512	18962084	46.7764	156.757	2972430080	0.244315	0.818747	15525143	1.31077e-12	4.39264e-12	8.32936e-05	38.729	129.788	2461056768	0.234197	0.784839	14882181	0.217973	0.73047	13851235	1.89446e-12	6.34871e-12	0.000120385	8.04736	26.9682	511373376	0.0263419	0.0882766	1.67391e+06	7.27078e-13	2.43658e-12	4.62026e-05
Rapeseed	32563364	23935888	119.316	162.322	3885327872	0.403464	0.548889	13138136	1.97532e-12	2.68731e-12	6.4323e-05	102.246	139.099	3329465600	0.310088	0.421856	10097504	0.371252	0.505066	12089207	3.69194e-12	5.02267e-12	0.000120222	17.0702	23.223	555862400	0.0322119	0.0438224	1.04893e+06	2.58698e-13	3.51943e-13	8.42408e-06
Rice	502483328	146731808	46.6014	159.587	23416422400	0.245845	0.841896	123532936	1.1015e-12	3.77207e-12	0.000553483	39.3729	134.832	19784204288	0.11004	0.376833	55293404	0.235746	0.807311	118458248	1.50646e-12	5.15889e-12	0.000756973	7.22854	24.7541	3632218624	0.0100992	0.0345848	5.07469e+06	6.96527e-13	2.38526e-12	0.000349993
Rye	18732844	9269563	38.8766	78.5658	728270208	0.102673	0.207491	1.92335e+06	1.14969e-12	2.32341e-12	2.1537e-05	33.6824	68.0688	630968000	0.108884	0.220043	2.03971e+06	0.0842219	0.170204	1.57772e+06	2.18238e-12	4.41038e-12	4.08823e-05	5.1942	10.497	97302216	0.0184507	0.0372869	345634	1.16994e-13	2.36433e-13	2.19163e-06
Sorghum	46086224	38431960	53.1204	63.7001	2448117760	0.0513249	0.061547	2365373	3.09353e-13	3.70965e-13	1.42569e-05	44.1983	53.001	2036934144	0.0511744	0.0613665	2358433	0.0385921	0.0462782	1.77856e+06	3.56565e-13	4.2758e-13	1.64327e-05	8.92205	10.699	411183744	0.0127329	0.0152688	586809	2.62141e-13	3.14351e-13	1.20811e-05
Soybean	138701952	73480632	164.58	310.661	22827546624	0.528272	0.997165	73272296	1.79155e-12	3.38173e-12	0.000248491	152.589	288.026	21164324864	0.469118	0.885507	65067628	0.511115	0.964781	70892696	2.43696e-12	4.6e-12	0.000338011	11.9913	22.6348	1663221376	0.0171562	0.032384	2.3796e+06	1.14614e-12	2.16345e-12	0.000158972
Sugarbeet	60955744	6031924	16.2423	164.137	990063744	0.075907	0.76708	4.62697e+06	4.59711e-13	4.64562e-12	2.8022e-05	13.6029	137.464	829172352	0.0604926	0.611309	3.68737e+06	0.0702023	0.70943	4.27923e+06	8.24785e-13	8.33488e-12	5.02754e-05	2.63948	26.6733	160891392	0.00570478	0.0576498	347739	9.46366e-14	9.56353e-13	5.76865e-06
Sugarcane	286714560	19224616	10.3922	154.989	2979598592	0.0319575	0.476612	9162687	8.10743e-14	1.20914e-12	2.32452e-05	8.54742	127.476	2450669312	0.0136334	0.203328	3.9089e+06	0.0299777	0.447085	8595033	8.65205e-14	1.29036e-12	2.48067e-05	1.84479	27.5131	528929312	0.00197986	0.0295275	567654	7.56282e-14	1.12791e-12	2.16837e-05
Sunflower	22382814	20187106	59.4198	65.8828	1329982464	0.10951	0.121421	2.45114e+06	6.73752e-13	7.47034e-13	1.50805e-05	51.0531	56.606	1142712064	0.111613	0.123753	2.49822e+06	0.0853389	0.094621	1.91012e+06	1.13721e-12	1.26091e-12	2.5454e-05	8.36671	9.27674	187270432	0.0241712	0.0268002	541018	2.10289e-13	2.33162e-13	4.70687e-06
Wheat	493161856	206140608	53.521	128.041	26394517504	0.103751	0.24821	51166140	7.61735e-13	1.82234e-12	0.000375659	44.6823	106.896	22035585024	0.133038	0.318274	65609144	0.0821425	0.196514	40509544	9.47524e-13	2.26682e-12	0.000467283	8.83874	21.1454	4358931456	0.0216087	0.0516958	10656595	5.75946e-13	1.37787e-12	0.000284035
Totals	2563866582	858334854			123052850624			3.84559e+08			0.00193725			105816283904			3.04375e+08			3.49203e+08			0.00267434			17236566224			3.53558e+07			0.00120015

## Sheet: Barley_Country_Level
Country	Country	Sub Region	Dry Production	Crop Area	Nutrient Use Efficiency	Fertiliser Input N&P			Nutrient Loading (N&P) to Aquatic Receptors			Aquatic Species Richness Impact Freshwater and Marine Combined			Nutrient Use Efficiency	N Input			N Load Freshwater			N Load Marine			N Marine Demersal Species Richness impact			Nutrient Use Efficiency	P Input			P Load Freshwater			P Freshwater Fish Species Richness impact
Name	Code		per country	per country		Per Tonne Crop	Per Hectare	Total	Per Tonne Crop	Per Hectare	Total	Per Tonne Crop	Per Hectare	Total	Nitrogen	Per Tonne Crop	Per Hectare	Total	Per Tonne Crop	Per Hectare	Total	Per Tonne Crop	Per Hectare	Total	Per Tonne Crop	Per Hectare	Total	Phopshours	Per Tonne Crop	Per Hectare	Total	Per Tonne Crop	Per Hectare	Total	Per Tonne Crop	Per Hectare	Total
			Tonne	ha	%	kg/tonne crop	kg/ha	kg	kg/tonne crop	kg/ha	kg	PDF.yr/tonne crop	PDF.yr/ha	PDF.yr	%	kg/tonne crop	kg/ha	kg	kg/tonne crop	kg/ha	kg	kg/tonne crop	kg/ha	kg	PDF.yr/tonne crop	PDF.yr/ha	PDF.yr	%	kg/tonne crop	kg/ha	kg	kg/tonne crop	kg/ha	kg	PDF.yr/tonne crop	PDF.yr/ha	PDF.yr
AFGHANISTAN	4	Southern Asia	79622.4	124255	155.499	11.658	7.47041	928236	0.102517	0.0656929	8162.67	3.39179e-13	2.17346e-13	2.70063e-08	132.399	11.2992	7.2405	899668	0.293301	0.187947	23353.3	0.00952923	0.00610632	758.741	4.15074e-14	2.65979e-14	3.30492e-09	882.957	0.358794	0.229915	28568.1	0.092988	0.0595866	7403.93	6.36851e-13	4.08093e-13	5.07076e-08
ALGERIA	12	Northern Africa	403700	432660	35.0887	51.6633	48.2053	20856502	0.0602996	0.0562635	24343	7.32683e-14	6.83642e-14	2.95784e-08	34.5228	43.3337	40.4333	17493852	0.122263	0.114079	49357.6	0.0117368	0.0109513	4738.17	3.59031e-14	3.35e-14	1.44941e-08	38.0332	8.32956	7.77204	3.36265e+06	0.0485627	0.0453123	19604.8	1.10633e-13	1.03228e-13	4.46628e-08
AZERBAIJAN	31	Western Asia	181723	107000	57.0772	31.7605	53.9404	5771611	0.08159	0.138568	14826.8	1.54939e-15	2.63141e-15	2.8156e-10	57.3995	26.0629	44.2639	4736229	0.0578069	0.0981763	10504.8	0.0503043	0.0854343	9141.45	0	0	0	55.6025	5.69759	9.67649	1.03538e+06	0.0312857	0.0531341	5685.33	3.09878e-15	5.26282e-15	5.6312e-10
ARGENTINA	32	South America	535491	252725	56.3762	32.1554	68.1329	17218932	0.0199265	0.0422215	10670.4	1.14652e-13	2.42932e-13	6.13952e-08	54.6842	27.3571	57.966	14649475	0.00346536	0.00734263	1855.67	0.0184974	0.0391935	9905.21	2.28921e-13	4.85053e-13	1.22585e-07	66.0231	4.79832	10.167	2.56946e+06	0.00142904	0.00302794	765.237	3.83309e-16	8.1218e-16	2.05259e-10
AUSTRALIA	36	Australia and New Zealand	6.33696e+06	3514478	40.3917	44.8805	80.924	284405696	0.0188613	0.0340088	119523	3.47504e-14	6.26585e-14	2.20212e-07	43.5491	34.352	61.9402	217687360	0.00599427	0.0108083	37985.5	0.0168222	0.0303322	106602	6.39356e-14	1.15282e-13	4.05158e-07	30.0899	10.5284	18.9839	66718336	0.00203903	0.00367659	12921.3	5.56518e-15	1.00346e-14	3.52663e-08
AUSTRIA	40	Western Europe	900443	230735	38.5003	47.0854	183.751	42397688	0.283398	1.10596	255184	7.76575e-13	3.03059e-12	6.99262e-07	35.7274	41.8726	163.408	37703900	0.197702	0.771534	178020	0.270782	1.05673	243824	1.54944e-12	6.04668e-12	1.39518e-06	60.774	5.21275	20.3428	4.69379e+06	0.0126158	0.0492334	11359.8	3.71327e-15	1.44911e-14	3.34359e-09
ARMENIA	51	Western Asia	65716.7	63812.9	46.3597	39.1029	40.2695	2.56972e+06	0.529878	0.545686	34821.8	1.00515e-14	1.03513e-14	6.60549e-10	44.4437	33.6606	34.6648	2.21206e+06	0.5815	0.598848	38214.2	0.207761	0.213959	13653.4	0	0	0	58.2097	5.44239	5.60476	357656	0.322117	0.331726	21168.4	2.01029e-14	2.07027e-14	1.3211e-09
BELGIUM	56	Western Europe	94857	26532.4	16.1884	111.982	400.35	10622243	0.282495	1.00996	26796.7	5.13496e-12	1.83582e-11	4.87087e-07	16.2804	91.8899	328.519	8716396	0.0625877	0.22376	5936.88	0.276247	0.987622	26204	1.02696e-11	3.67153e-11	9.74145e-07	15.7676	20.0918	71.8309	1.90585e+06	0.00624794	0.0223372	592.661	3.02261e-16	1.08062e-15	2.86715e-11
BOLIVIA	68	South America	54221.6	87935.4	126.719	14.3056	8.82094	775673	0.142386	0.0877962	7720.39	2.56142e-13	1.57939e-13	1.38884e-08	107.822	13.8747	8.55525	752309	0.133567	0.0823586	7242.24	0.101706	0.0627123	5514.63	4.2647e-13	2.62964e-13	2.31239e-08	735.2	0.430903	0.265698	23364.2	0.0406805	0.0250839	2205.76	8.58135e-14	5.29132e-14	4.65295e-09
BOSNIA AND HERZEGOVINA	70	Southern Europe	48844.9	22668.9	87.5668	20.7019	44.6066	1.01118e+06	0.191595	0.412832	9358.44	5.76968e-12	1.2432e-11	2.81819e-07	80.8193	18.5104	39.8846	904140	0.208192	0.448594	10169.1	0.0857714	0.184813	4189.49	6.81926e-13	1.46935e-12	3.33086e-08	144.56	2.19147	4.72199	107042	0.105824	0.22802	5168.95	1.08574e-11	2.33946e-11	5.3033e-07
BRAZIL	76	South America	252355	136780	60.1912	30.1174	55.5656	7600283	0.131169	0.242004	33101.3	9.81055e-13	1.81002e-12	2.47575e-07	62.1048	24.0883	44.4422	6078817	0.193297	0.356627	48779.6	0.0491435	0.0906682	12401.6	7.23456e-13	1.33476e-12	1.82568e-07	52.5455	6.02906	11.1234	1.52147e+06	0.082026	0.151335	20699.7	1.23865e-12	2.28528e-12	3.12581e-07
BULGARIA	100	Eastern Europe	680482	289710	96.399	18.8052	44.1704	12796581	0.0479777	0.112692	32647.9	2.2159e-13	5.20479e-13	1.50788e-07	88.3208	16.9382	39.7852	11526169	0.0481706	0.113145	32779.2	0.0325053	0.0763498	22119.3	4.17586e-13	9.80842e-13	2.84159e-07	169.69	1.86693	4.38512	1.27041e+06	0.0154724	0.0363422	10528.7	2.55943e-14	6.01169e-14	1.74165e-08
BELARUS	112	Eastern Europe	1.4222e+06	757601	37.567	48.2551	90.5866	68628552	0.0666363	0.125093	94770.4	4.34641e-13	8.15927e-13	6.18147e-07	35.6585	41.9535	78.757	59666376	0.105535	0.198114	150092	0.0607083	0.113964	86339.5	8.69204e-13	1.63171e-12	1.23618e-06	50.2728	6.30161	11.8297	8962176	0.00592805	0.0111284	8430.89	7.71143e-17	1.44762e-16	1.09672e-10
CANADA	124	Northern America	10337074	4.18793e+06	48.5588	37.3321	92.1468	385904576	0.0196966	0.0486171	203605	1.23206e-13	3.04109e-13	1.27359e-06	44.1397	33.8924	83.6566	350348096	0.0501596	0.123809	518503	0.0141012	0.0348061	145765	2.44519e-13	6.03546e-13	2.52761e-06	92.1009	3.43971	8.49023	35556492	0.00559537	0.0138111	57839.8	1.89249e-15	4.67123e-15	1.95628e-08
CHILE	152	South America	45758.7	15341.2	28.834	62.8701	187.525	2876857	0.569377	1.6983	26054	2.27235e-13	6.77781e-13	1.0398e-08	31.8047	47.0371	140.299	2.15236e+06	0.0253719	0.0756775	1160.99	0.564531	1.68384	25832.2	4.07307e-13	1.21489e-12	1.86378e-08	20.0087	15.8331	47.2258	724501	0.00484617	0.0144548	221.755	4.71633e-14	1.40676e-13	2.15813e-09
CHINA	156	Eastern Asia	2.92785e+06	1.1162e+06	33.3339	54.3831	142.649	159225552	0.188883	0.49545	553022	1.6904e-12	4.43401e-12	4.94925e-06	31.7145	47.1709	123.731	138109200	0.233774	0.6132	684456	0.15939	0.418087	466669	2.37075e-12	6.21858e-12	6.94119e-06	43.9253	7.21224	18.918	21116346	0.0294937	0.0773633	86353.1	1.01006e-12	2.64943e-12	2.9573e-06
CROATIA	191	Southern Europe	122080	44947.8	63.3983	28.5938	77.6617	3490722	0.0384679	0.10448	4696.15	3.59622e-13	9.76744e-13	4.39025e-08	77.8474	19.2171	52.1942	2.34601e+06	0.0273829	0.0743728	3342.89	0.0255348	0.0693532	3117.27	5.22883e-13	1.42017e-12	6.38334e-08	33.7857	9.37674	25.4675	1.14471e+06	0.0129332	0.0351269	1578.87	1.9636e-13	5.3332e-13	2.39716e-08
CZECHIA	203	Eastern Europe	1.46297e+06	447317	40.9913	44.224	144.636	64698288	0.245817	0.803954	359622	8.16418e-13	2.67013e-12	1.19439e-06	38.2609	39.1	127.878	57202056	0.151727	0.49623	221972	0.227219	0.743129	332414	1.6317e-12	5.33653e-12	2.38712e-06	61.8268	5.12399	16.7582	7496233	0.0185978	0.0608248	27208	1.13996e-15	3.72829e-15	1.66773e-09
DENMARK	208	Northern Europe	3.33193e+06	713430	52.955	34.2328	159.877	114061248	0.0327028	0.152731	108963	4.50632e-12	2.10458e-11	1.50147e-05	51.5357	29.0284	135.571	96720608	0.000864218	0.00403615	2879.51	0.032285	0.15078	107571	9.01258e-12	4.20914e-11	3.00293e-05	60.8717	5.20439	24.306	17340636	0.000417752	0.00195102	1391.92	6.44524e-17	3.01011e-16	2.14751e-10
ECUADOR	218	South America	25845.9	43851	23.3904	77.502	45.6799	2003107	1.00539	0.592579	25985.2	9.35355e-13	5.513e-13	2.41751e-08	23.383	63.9781	37.7088	1.65357e+06	0.211509	0.124664	5466.63	0.902337	0.53184	23321.7	1.01251e-12	5.96773e-13	2.61691e-08	23.4251	13.5239	7.97104	349538	0.103052	0.0607392	2663.47	8.58204e-13	5.05827e-13	2.2181e-08
ETHIOPIA	231	Eastern Africa	665665	626036	18.6023	97.4503	103.619	64869240	0.0862162	0.0916738	57391.1	1.78835e-13	1.90155e-13	1.19044e-07	19.221	77.8315	82.7583	51809692	0.0662046	0.0703954	44070.1	0.0294626	0.0313276	19612.2	1.70484e-13	1.81276e-13	1.13486e-07	16.1478	19.6188	20.8607	13059550	0.0567536	0.0603462	37778.9	1.87185e-13	1.99034e-13	1.24603e-07
ERITREA	232	Eastern Africa	18619.5	34245.5	27.664	65.5293	35.6287	1.22012e+06	0.0103749	0.00564092	193.176	8.22741e-15	4.4733e-15	1.5319e-10	28.267	52.9239	28.7751	985416	0.0342953	0.0186466	638.56	0.00103575	0.000563143	19.2851	8.86053e-15	4.81754e-15	1.64979e-10	25.1321	12.6054	6.85365	234706	0.00933917	0.00507778	173.891	7.59428e-15	4.12907e-15	1.41402e-10
ESTONIA	233	Northern Europe	248757	148263	48.2358	37.5821	63.0553	9348788	0.140998	0.236567	35074.2	1.41007e-12	2.36581e-12	3.50763e-07	45.027	33.2245	55.7442	8264827	0.00801203	0.0134426	1993.05	0.137535	0.230756	34212.7	2.81899e-12	4.72971e-12	7.01243e-07	72.702	4.35752	7.31105	1.08396e+06	0.00346329	0.00581072	861.517	1.14242e-15	1.91675e-15	2.84184e-10
FINLAND	246	Northern Europe	1.33642e+06	544074	33.2049	54.5943	134.101	72960752	0.518537	1.27369	692982	7.42195e-12	1.82306e-11	9.91881e-06	30.8998	48.4145	118.921	64701992	0.0408882	0.100434	54643.7	0.507066	1.24551	677651	1.48426e-11	3.6458e-11	1.98359e-05	51.264	6.17978	15.1795	8258756	0.0114713	0.0281771	15330.5	1.30389e-15	3.20276e-15	1.74254e-09
FRANCE	250	Western Europe	8356408	1.54872e+06	48.126	37.6678	203.243	314767104	0.0989204	0.533742	826619	7.68017e-13	4.14397e-12	6.41786e-06	44.6246	33.5241	180.885	280140864	0.0309764	0.167139	258852	0.0960221	0.518104	802400	1.5317e-12	8.26453e-12	1.27995e-05	76.4539	4.14367	22.3579	34626232	0.00289833	0.0156384	24219.6	4.33752e-15	2.34039e-14	3.62461e-08
GEORGIA	268	Western Asia	42343.9	34829.9	40.3989	44.8725	54.5531	1.90008e+06	0.432685	0.52603	18321.6	1.86564e-12	2.26813e-12	7.89987e-08	38.9479	38.4103	46.6967	1.62644e+06	0.624037	0.758664	26424.2	0.126551	0.153853	5358.67	3.67888e-12	4.47254e-12	1.55778e-07	49.0233	6.46224	7.85637	273637	0.306134	0.372178	12962.9	5.24093e-14	6.37158e-14	2.21921e-09
GERMANY	276	Western Europe	9454559	1.86784e+06	40.9614	44.2563	224.015	418423520	0.197142	0.997886	1.86389e+06	1.05035e-12	5.31665e-12	9.93063e-06	37.7489	39.6303	200.599	374687200	0.0701133	0.354897	662890	0.193001	0.976926	1.82474e+06	2.10045e-12	1.0632e-11	1.98588e-05	68.4832	4.62595	23.4155	43736328	0.00414096	0.0209606	39150.9	2.56112e-16	1.29638e-15	2.42142e-09
GREECE	300	Southern Europe	232816	111915	33.4883	54.1323	112.611	12602850	0.145632	0.302958	33905.4	7.50029e-12	1.56028e-11	1.74619e-06	31.2175	47.9218	99.6917	11156951	0.312184	0.649436	72681.3	0.0452667	0.0941682	10538.8	6.73077e-14	1.4002e-13	1.56703e-08	51.0105	6.21049	12.9197	1.4459e+06	0.100365	0.20879	23366.6	1.49333e-11	3.10657e-11	3.4767e-06
HUNGARY	348	Eastern Europe	923263	339740	48.2089	37.603	102.189	34717516	0.0802119	0.217981	74056.8	4.0499e-13	1.10059e-12	3.73913e-07	44.4807	33.6326	91.3986	31051734	0.0440273	0.119647	40648.8	0.0763321	0.207437	70474.6	8.08999e-13	2.1985e-12	7.46919e-07	79.7892	3.97046	10.79	3.66578e+06	0.00387985	0.0105437	3582.12	9.81117e-16	2.66624e-15	9.0583e-10
INDIA	356	Southern Asia	1.29067e+06	739620	40.0369	45.2782	79.0126	58439336	0.0482537	0.084205	62279.7	1.16577e-13	2.03433e-13	1.50463e-07	40.2138	37.2012	64.9178	48014536	0.0774611	0.135173	99977	0.0216126	0.0377151	27894.9	1.22991e-13	2.14626e-13	1.58741e-07	39.2224	8.07703	14.0948	10424802	0.026641	0.0464899	34384.9	1.10163e-13	1.9224e-13	1.42185e-07
IRAN	364	Southern Asia	2.16983e+06	1491669	31.1693	58.1599	84.6012	126197032	0.171547	0.249538	372229	4.35207e-13	6.33066e-13	9.44325e-07	30.0559	49.774	72.4029	108001112	0.24998	0.36363	542415	0.0715518	0.104082	155255	1.54204e-13	2.2431e-13	3.34597e-07	37.7778	8.38587	12.1984	18195918	0.0999956	0.145457	216974	7.16209e-13	1.04182e-12	1.55405e-06
IRAQ	368	Western Asia	66010.2	71351.5	7.61374	238.096	220.272	15716739	0.168499	0.155885	11122.7	6.1091e-14	5.65178e-14	4.03263e-09	7.98135	187.437	173.405	12372742	0.483915	0.447689	31943.3	0.0263192	0.0243489	1737.33	9.34804e-14	8.64825e-14	6.17065e-09	6.2536	50.6588	46.8665	3.344e+06	0.14218	0.131536	9385.32	2.87017e-14	2.65531e-14	1.8946e-09
IRELAND	372	Northern Europe	1.01867e+06	183436	39.7302	45.6278	253.383	46479704	0.0341464	0.189624	34784	6.76102e-13	3.75457e-12	6.88725e-07	40.8194	36.6493	203.523	37333548	0.00254251	0.0141192	2589.98	0.0332613	0.184709	33882.3	1.35114e-12	7.50322e-12	1.37636e-06	35.2842	8.97851	49.8601	9146154	0.000885175	0.00491561	901.702	1.06695e-15	5.92506e-15	1.08687e-09
ITALY	380	Southern Europe	895887	279957	37.6503	48.1483	154.079	43135480	0.0448114	0.1434	40146	2.90101e-13	9.2835e-13	2.59898e-07	39.8863	37.5066	120.024	33601696	0.0572	0.183045	51244.8	0.0331777	0.106171	29723.5	1.24411e-13	3.98126e-13	1.11458e-07	29.7696	10.6417	34.0544	9533782	0.0116338	0.037229	10422.5	4.55792e-13	1.45857e-12	4.08338e-07
JAPAN	392	Eastern Asia	163631	54689.4	57.5293	31.5109	94.2806	5.15615e+06	0.286868	0.858308	46940.3	1.21144e-12	3.62462e-12	1.98228e-07	83.8625	17.8387	53.3734	2.91896e+06	0.179555	0.537228	29380.7	0.19592	0.586192	32058.5	2.16036e-12	6.46379e-12	3.53501e-07	23.1711	13.6722	40.9072	2237190	0.0909478	0.272116	14881.8	2.62515e-13	7.85445e-13	4.29555e-08
KAZAKHSTAN	398	Central Asia	1698318	1.78637e+06	130.226	13.9205	13.2343	23641368	0.040789	0.0387784	69272.6	4.5698e-14	4.34454e-14	7.76097e-08	119.815	12.486	11.8705	21205128	0.102535	0.0974807	174137	0.0141365	0.0134396	24008.2	8.78022e-14	8.34743e-14	1.49116e-07	220.843	1.4345	1.36379	2.43624e+06	0.0266525	0.0253387	45264.4	3.5937e-15	3.41656e-15	6.10325e-09
JORDAN	400	Western Asia	13881.1	13836.2	12.1075	149.726	150.212	2.07836e+06	0.0126178	0.0126587	175.149	3.81435e-14	3.82673e-14	5.29474e-10	12.6441	118.316	118.7	1.64235e+06	0.00311572	0.00312583	43.2496	0.0108252	0.0108603	150.265	0	0	0	10.086	31.41	31.5119	436005	0.0017926	0.00179841	24.8832	7.6287e-14	7.65345e-14	1.05895e-09
KENYA	404	Eastern Africa	46190.3	21598.1	95.6109	18.9602	40.5487	875776	0.0128373	0.0274542	592.959	6.90829e-14	1.47742e-13	3.19096e-09	252.778	5.91823	12.6569	273364	0.0116302	0.0248727	537.204	0.00311026	0.00665167	143.664	3.53723e-14	7.56479e-14	1.63385e-09	24.2908	13.042	27.8918	602412	0.00972705	0.0208025	449.295	1.02793e-13	2.19836e-13	4.74806e-09
N. KOREA	408	Eastern Asia	63086	42926.2	56.9567	31.8277	46.7752	2007881	0.466148	0.68507	29407.5	7.6859e-12	1.12955e-11	4.84873e-07	63.8541	23.4284	34.4314	1.47801e+06	0.358085	0.526255	22590.1	0.317924	0.467233	20056.5	1.53233e-11	2.25197e-11	9.66685e-07	37.7177	8.39924	12.3439	529875	0.148225	0.217837	9350.91	4.85107e-14	7.12933e-14	3.06035e-09
S.KOREA	410	Eastern Asia	242864	73204.6	12.6665	143.118	474.808	34758076	1.24716	4.13759	302891	1.8248e-11	6.05395e-11	4.43176e-06	13.3013	112.47	373.13	27314808	0.428834	1.4227	104148	1.18522	3.93208	287846	3.62845e-11	1.20377e-10	8.81218e-06	10.3367	30.648	101.678	7.44327e+06	0.061945	0.205509	15044.2	2.11449e-13	7.01502e-13	5.13532e-08
KYRGYZSTAN	417	Central Asia	141304	77947.6	212.201	8.54285	15.4865	1.20714e+06	0.332141	0.602106	46932.7	9.64416e-15	1.74829e-14	1.36275e-09	196.042	7.63101	13.8335	1.07829e+06	1.08665	1.96988	153547	0	0	0	0	0	0	347.427	0.911845	1.65299	128847	0.332141	0.602106	46932.7	1.92883e-14	3.49659e-14	2.72551e-09
LATVIA	428	Northern Europe	230976	142780	125.806	14.4095	23.3102	3.32823e+06	0.0502675	0.0813179	11610.6	4.77497e-13	7.72448e-13	1.1029e-07	120.043	12.4622	20.1601	2.87846e+06	0.00612439	0.00990745	1414.58	0.0481403	0.0778767	11119.2	9.54642e-13	1.54433e-12	2.20499e-07	162.69	1.94726	3.15009	449769	0.00212718	0.00344115	491.327	3.51402e-16	5.68464e-16	8.11652e-11
LIBYA	434	Northern Africa	46028.2	135742	8.27128	219.168	74.317	10087911	0.0453431	0.0153753	2087.07	3.10535e-14	1.05298e-14	1.42934e-09	9.07565	164.837	55.894	7587140	0.0148285	0.00502814	682.529	0.0444937	0.0150872	2047.97	6.19205e-14	2.09964e-14	2.85009e-09	5.8309	54.3312	18.423	2.50077e+06	0.000849478	0.000288047	39.1	1.86409e-16	6.32089e-17	8.58008e-12
LITHUANIA	440	Northern Europe	816272	392827	74.9226	24.1956	50.2771	19750218	0.0471778	0.0980328	38509.9	8.68065e-13	1.80379e-12	7.08577e-07	72.8281	20.5415	42.6841	16767479	0.00556716	0.0115682	4544.32	0.0454831	0.0945113	37126.6	1.7361e-12	3.60751e-12	1.41713e-06	86.6972	3.6541	7.59301	2982739	0.00169471	0.00352152	1383.35	3.32572e-17	6.91066e-17	2.7147e-11
LUXEMBOURG	442	Western Europe	14418.9	5584.44	14.2227	127.458	329.094	1.8378e+06	0.935469	2.41535	13488.4	2.65238e-12	6.84836e-12	3.82442e-08	14.1757	105.533	272.483	1.52166e+06	0.238177	0.614966	3434.24	0.917558	2.36911	13230.1	5.30423e-12	1.36954e-11	7.64809e-08	14.4491	21.9253	56.6104	316137	0.0179115	0.0462469	258.263	5.26679e-16	1.35987e-15	7.59411e-12
MEXICO	484	Central America	546908	277414	29.2456	61.9855	122.201	33900348	0.152937	0.301508	83642.5	3.85868e-13	7.60718e-13	2.11034e-07	28.8536	51.8479	102.215	28356028	0.0257181	0.0507019	14065.4	0.144795	0.285455	79189.3	3.70774e-13	7.30961e-13	2.02779e-07	31.2501	10.1376	19.9857	5.54432e+06	0.00814252	0.0160526	4453.21	4.00962e-13	7.90475e-13	2.19289e-07
MOLDOVA	498	Eastern Europe	161532	103871	84.1161	21.5512	33.5148	3.48121e+06	0.100389	0.156117	16216	3.03496e-13	4.71975e-13	4.90244e-08	81.8669	18.2736	28.4177	2.95177e+06	0.0936999	0.145715	15135.6	0.0765126	0.118987	12359.3	6.04203e-13	9.39613e-13	9.75984e-08	96.6557	3.27761	5.0971	529441	0.0238763	0.0371306	3856.79	2.78861e-15	4.33665e-15	4.50451e-10
MONTENEGRO	499	Southern Europe	16692.3	12005.3	33.6932	53.8032	74.8081	898096	0.986926	1.37223	16474	3.81397e-13	5.30296e-13	6.36638e-09	30.4614	49.1113	68.2846	819779	1.56124	2.17075	26060.5	0.0803517	0.111721	1341.25	2.06986e-13	2.87794e-13	3.45506e-09	67.5215	4.69184	6.52355	78317.4	0.906574	1.2605	15132.8	5.55809e-13	7.72799e-13	9.27771e-09
MOROCCO	504	Northern Africa	1.21127e+06	1.93492e+06	22.1359	81.894	51.2661	99195816	0.171013	0.107055	207143	3.13935e-13	1.96525e-13	3.8026e-07	22.8592	65.4442	40.9685	79270688	0.375888	0.235308	455303	0.0411532	0.0257622	49847.8	4.45703e-13	2.79013e-13	5.39867e-07	19.2586	16.4498	10.2977	19925126	0.12986	0.0812932	157296	1.82167e-13	1.14037e-13	2.20653e-07
NEPAL	524	Southern Asia	27199.7	28945.5	41.1413	44.0628	41.4052	1.19849e+06	1.31669	1.23728	35813.6	3.53602e-12	3.32274e-12	9.61785e-08	46.1417	32.4218	30.4663	881864	0.644061	0.605215	17518.2	1.05489	0.991261	28692.6	2.55403e-12	2.39999e-12	6.94688e-08	27.2142	11.641	10.9389	316631	0.261806	0.246016	7121.05	4.518e-12	4.2455e-12	1.22888e-07
NETHERLANDS	528	Western Europe	226301	43268.2	34.5576	52.4574	274.362	11871153	0.0183877	0.0961712	4161.16	2.14944e-12	1.1242e-11	4.86421e-07	34.1721	43.7784	228.969	9907084	0.00162396	0.00849359	367.503	0.0178939	0.0935882	4049.4	4.29888e-12	2.2484e-11	9.72841e-07	36.5018	8.67902	45.3929	1964069	0.00049386	0.00258298	111.761	8.15359e-18	4.26448e-17	1.84516e-12
NEW ZEALAND	554	Australia and New Zealand	313463	64066.2	30.4111	59.6099	291.659	18685512	0.134797	0.659535	42253.9	2.61097e-12	1.2775e-11	8.18444e-07	36.9557	40.4809	198.065	12689266	0.00580075	0.0283819	1818.32	0.133035	0.650916	41701.7	5.22003e-12	2.55406e-11	1.63629e-06	16.5612	19.129	93.5945	5996247	0.00176161	0.00861922	552.201	1.90976e-15	9.34409e-15	5.9864e-10
NORWAY	578	Northern Europe	289739	95805.9	23.3051	77.7854	235.241	22537490	0.716662	2.16735	207645	1.26846e-11	3.83612e-11	3.67522e-06	22.8363	65.5096	198.116	18980716	0.17476	0.528515	50634.8	0.702703	2.12514	203601	2.5369e-11	7.67216e-11	7.35038e-06	25.8069	12.2758	37.1248	3.55677e+06	0.0139599	0.0422181	4044.74	2.2635e-16	6.84536e-16	6.55826e-11
PAKISTAN	586	Southern Asia	107429	128687	14.8081	122.419	102.197	13151417	0.135437	0.113064	14549.9	1.92089e-12	1.60358e-12	2.0636e-07	14.8588	100.681	84.0494	10816074	0.398883	0.332991	42851.7	0.0261819	0.0218569	2812.7	1.11669e-13	9.32223e-14	1.19965e-08	14.5733	21.7384	18.1474	2335343	0.109255	0.0912071	11737.2	3.73011e-12	3.11393e-12	4.00723e-07
PERU	604	South America	138720	135219	20.5793	88.0887	90.3693	12219653	1.23649	1.2685	171526	1.24772e-12	1.28003e-12	1.73084e-07	19.4909	76.7537	78.7409	10647270	0.768869	0.788775	106657	1.01213	1.03833	140402	1.71224e-12	1.75657e-12	2.37522e-07	27.9489	11.335	11.6284	1.57238e+06	0.224364	0.230173	31123.7	7.83208e-13	8.03486e-13	1.08647e-07
POLAND	616	Eastern Europe	2.84658e+06	1.08198e+06	39.532	45.8566	120.644	130534560	0.147864	0.389015	420906	2.08635e-12	5.48897e-12	5.93896e-06	38.8047	38.552	101.426	109741488	0.0241598	0.063562	68772.9	0.145367	0.382446	413799	4.17259e-12	1.09777e-11	1.18776e-05	43.3701	7.30457	19.2176	20793072	0.00249672	0.00656861	7107.11	1.00424e-16	2.64206e-16	2.85866e-10
PORTUGAL	620	Southern Europe	19046.4	18669.5	22.8052	79.4908	81.0955	1514012	0.336623	0.343418	6411.44	5.4192e-12	5.5286e-12	1.03216e-07	25.1366	59.5148	60.7163	1.13354e+06	0.126155	0.128701	2402.79	0.319238	0.325682	6080.33	1.08154e-11	1.10337e-11	2.05994e-07	15.859	19.976	20.3793	380470	0.0173848	0.0177357	331.117	2.30159e-14	2.34805e-14	4.38369e-10
ROMANIA	642	Eastern Europe	995438	473873	66.408	27.2979	57.3432	27173380	0.0390045	0.0819347	38826.6	2.47868e-13	5.20682e-13	2.46737e-07	62.7271	23.8493	50.099	23740538	0.020265	0.0425696	20172.6	0.0330625	0.0694527	32911.7	4.95192e-13	1.04022e-12	4.92933e-07	91.8641	3.44857	7.24423	3.43284e+06	0.005942	0.012482	5914.9	5.43536e-16	1.14178e-15	5.41056e-10
RUSSIA	643	Eastern Europe	13463797	8982126	79.1086	22.9153	34.349	308527296	0.0539768	0.0809088	726733	1.93592e-13	2.90186e-13	2.60649e-06	74.5874	20.057	30.0645	270043552	0.0691448	0.103645	930952	0.0336824	0.0504884	453493	3.85608e-13	5.78009e-13	5.19175e-06	110.835	2.85831	4.28448	38483752	0.0202944	0.0304204	273240	1.57657e-15	2.36321e-15	2.12266e-08
SAUDI ARABIA	682	Western Asia	174589	37854.4	17.355	104.454	481.753	18236438	0.000177417	0.000818267	30.975	1.67547e-15	7.72747e-15	2.92518e-10	18.6384	80.2642	370.188	14013216	6.0899e-05	0.000280873	10.6323	0.000162022	0.000747265	28.2872	3.33947e-15	1.5402e-14	5.83033e-10	13.0966	24.1896	111.565	4223222	1.53947e-05	7.10019e-05	2.68773	1.14798e-17	5.29463e-17	2.00425e-12
SERBIA	688	Southern Europe	260513	111479	51.4927	35.205	82.27	9171361	0.133945	0.313014	34894.4	3.53249e-13	8.25502e-13	9.2026e-08	47.4557	31.5241	73.6682	8212447	0.161273	0.376876	42013.7	0.0971053	0.226924	25297.2	6.82127e-13	1.59405e-12	1.77703e-07	86.0667	3.68087	8.60175	958914	0.0368399	0.0860904	9597.26	2.43715e-14	5.69534e-14	6.3491e-09
SLOVAKIA	703	Eastern Europe	619210	226158	59.0671	30.6905	84.0292	19003884	0.0697056	0.190851	43162.4	3.02531e-13	8.28315e-13	1.8733e-07	57.4874	26.0231	71.25	16113752	0.0560937	0.153582	34733.8	0.0523201	0.14325	32397.1	5.99181e-13	1.64053e-12	3.71019e-07	67.8743	4.66745	12.7793	2.89013e+06	0.0173855	0.0476006	10765.3	5.87969e-15	1.60983e-14	3.64076e-09
SLOVENIA	705	Southern Europe	37481.1	11982.2	26.701	67.8926	212.372	2.54469e+06	0.415033	1.29825	15555.9	1.62069e-12	5.06962e-12	6.07454e-08	26.5107	56.4301	176.517	2.11506e+06	0.233136	0.729263	8738.2	0.406126	1.27039	15222.1	3.24013e-12	1.01353e-11	1.21444e-07	27.6379	11.4625	35.8555	429628	0.00890684	0.0278611	333.838	1.25441e-15	3.92388e-15	4.70168e-11
SOUTH AFRICA	710	Southern Africa	140604	86028.9	71.7211	25.2757	41.3102	3.55387e+06	0.0211345	0.0345419	2971.6	4.87415e-13	7.96625e-13	6.85327e-08	71.1797	21.0172	34.3502	2955113	0.00644667	0.0105363	906.43	0.0185541	0.0303246	2608.79	3.53635e-14	5.77975e-14	4.97226e-09	74.393	4.25846	6.95997	598759	0.00258037	0.00421732	362.811	9.39467e-13	1.53545e-12	1.32093e-07
ZIMBABWE	716	Eastern Africa	26408	5567.55	553.188	3.277	15.5435	86539.1	0.0087064	0.0412962	229.918	4.26539e-14	2.02316e-13	1.1264e-09	655.943	2.28068	10.8177	60228.3	0.0089068	0.0422467	235.211	0.0025448	0.0120705	67.2031	3.0297e-14	1.43705e-13	8.00083e-10	317.97	0.99632	4.72574	26310.8	0.00616159	0.0292257	162.715	5.50108e-14	2.60927e-13	1.45272e-09
SPAIN	724	Southern Europe	7.67915e+06	3.25536e+06	28.6662	63.2382	149.174	485615488	0.170931	0.403214	1.3126e+06	5.35957e-13	1.26428e-12	4.11569e-06	29.5343	50.6529	119.487	388971200	0.32266	0.761132	2.47776e+06	0.135073	0.318627	1.03724e+06	9.53326e-13	2.24883e-12	7.32073e-06	25.1722	12.5853	29.6878	96644304	0.0358581	0.0845865	275359	1.18588e-13	2.79741e-13	9.10657e-07
SWEDEN	752	Northern Europe	1247836	338797	37.1754	48.7635	179.603	60848844	0.239805	0.883234	299237	3.60312e-12	1.32708e-11	4.4961e-06	33.7041	44.3862	163.481	55386744	0.0154883	0.0570455	19326.8	0.23495	0.865353	293179	7.20619e-12	2.65414e-11	8.99215e-06	72.3741	4.37726	16.122	5462100	0.00485495	0.0178815	6058.18	3.58655e-17	1.32098e-16	4.47543e-11
SWITZERLAND	756	Western Europe	235661	44261.5	45.426	39.9067	212.475	9404438	0.240534	1.28067	56684.5	6.89416e-13	3.67065e-12	1.62468e-07	42.7351	35.0064	186.384	8249628	0.179354	0.954934	42266.8	0.188112	1.00156	44330.7	1.37249e-12	7.30752e-12	3.23442e-07	64.6491	4.9003	26.0906	1.15481e+06	0.0524219	0.279109	12353.8	6.34454e-15	3.37801e-14	1.49516e-09
SYRIA	760	Western Asia	794788	1.3429e+06	14.2684	127.05	75.1937	100977816	0.143941	0.0851903	114402	5.38821e-13	3.18898e-13	4.28249e-07	14.2616	104.897	62.0827	83370960	0.257378	0.152327	204561	0.131637	0.0779085	104624	5.31279e-13	3.14434e-13	4.22254e-07	14.3006	22.1529	13.111	17606856	0.0123036	0.0072818	9778.74	5.46363e-13	3.23362e-13	4.34243e-07
TAJIKISTAN	762	Central Asia	24808.6	30979.8	68.4541	26.482	21.2068	656981	0.891573	0.713972	22118.7	3.91672e-13	3.13651e-13	9.71683e-09	66.1789	22.6054	18.1024	560808	3.15965	2.53025	78386.5	0.000564847	0.000452329	14.013	1.61048e-15	1.28967e-15	3.99538e-11	81.721	3.8766	3.10438	96173	0.891008	0.713519	22104.7	7.81734e-13	6.26012e-13	1.93937e-08
THAILAND	764	South-eastern Asia	15088.6	7688.87	52.2906	34.6678	68.0321	523090	0.0826938	0.162278	1247.74	5.74843e-13	1.12807e-12	8.6736e-09	49.1983	30.4076	59.6718	458809	0.0293847	0.0576646	443.376	0.0774324	0.151953	1168.35	1.032e-12	2.0252e-12	1.55715e-08	74.3623	4.26022	8.36026	64281	0.0052614	0.010325	79.3874	1.17685e-13	2.30945e-13	1.7757e-09
TUNISIA	788	Northern Africa	140696	185621	24.2887	74.6356	56.572	10500941	0.039863	0.0302152	5608.57	9.38661e-14	7.11481e-14	1.32066e-08	24.9245	60.0213	45.4946	8444761	0.0831615	0.0630343	11700.5	0.00425369	0.00322419	598.477	4.6992e-14	3.56188e-14	6.61159e-09	21.6773	14.6143	11.0773	2.05618e+06	0.0356094	0.026991	5010.1	1.4074e-13	1.06677e-13	1.98016e-08
TURKEY	792	Western Asia	6730765	3.42748e+06	36.9584	49.0497	96.3221	330141952	0.202864	0.398377	1.36543e+06	7.49659e-13	1.47215e-12	5.04578e-06	37.271	40.1384	78.8225	270162368	0.48887	0.960025	3.29047e+06	0.0756049	0.14847	508879	7.41989e-13	1.45709e-12	4.99415e-06	35.5505	8.91126	17.4996	59979584	0.127259	0.249906	856549	7.57329e-13	1.48722e-12	5.09741e-06
TURKMENISTAN	795	Central Asia	25164.9	58255	29.4761	61.5007	26.567	1.54766e+06	0.00125992	0.000544261	31.7059	4.94435e-16	2.13586e-16	1.24424e-11	25.4533	58.7744	25.3893	1.47905e+06	0.00470614	0.00203295	118.43	0	0	0	0	0	0	116.201	2.72631	1.17771	68607.2	0.00125992	0.000544261	31.7059	9.88871e-16	4.27171e-16	2.48848e-11
UKRAINE	804	Eastern Europe	6749166	3854658	85.9571	21.0896	36.926	142337200	0.0397728	0.0696386	268433	3.05553e-13	5.34996e-13	2.06223e-06	82.3719	18.1615	31.7993	122575240	0.0289895	0.0507581	195655	0.0329793	0.0577438	222583	6.0969e-13	1.06751e-12	4.1149e-06	108.194	2.92806	5.12677	19761964	0.00679349	0.0118948	45850.4	1.41565e-15	2.47868e-15	9.55447e-09
MACEDONIA	807	Southern Europe	100426	49868.8	44.1565	41.054	82.6748	4.12289e+06	0.151104	0.304294	15174.8	2.09559e-13	4.2201e-13	2.10451e-08	42.2138	35.4386	71.3665	3.55896e+06	0.370336	0.745784	37191.3	0.0470071	0.0946632	4720.74	1.49015e-13	3.00087e-13	1.4965e-08	56.4167	5.61535	11.3082	563928	0.104097	0.209631	10454	2.70102e-13	5.43934e-13	2.71253e-08
EGYPT	818	Northern Africa	92036.1	35546.5	22.2262	81.5613	211.176	7506584	0.00254539	0.00659047	234.268	2.0618e-14	5.33836e-14	1.8976e-09	19.8903	75.2124	194.738	6.92226e+06	0.000924095	0.00239264	85.0501	0.00174478	0.00451753	160.582	1.78441e-14	4.62016e-14	1.6423e-09	49.899	6.34882	16.4382	584321	0.000800618	0.00207294	73.6858	2.33919e-14	6.05657e-14	2.1529e-09
UK	826	Northern Europe	5584232	1.13531e+06	44.7309	40.5268	199.339	226311008	0.115548	0.568345	645247	8.71569e-13	4.28698e-12	4.86704e-06	42.9112	34.8627	171.479	194681344	0.00951684	0.0468104	53144.3	0.114155	0.561495	637469	1.74291e-12	8.57284e-12	9.73282e-06	55.9312	5.6641	27.86	31629672	0.00139279	0.00685071	7777.67	2.28168e-16	1.12229e-15	1.27414e-09
USA	840	Northern America	5.71683e+06	2.05937e+06	60.031	30.1977	83.8292	172635408	0.0321676	0.0892975	183897	1.92814e-13	5.35254e-13	1.10229e-06	55.1475	27.1272	75.3055	155081952	0.0665593	0.184769	380508	0.0212489	0.0589872	121477	3.68257e-13	1.02229e-12	2.10527e-06	103.176	3.07049	8.5237	17553458	0.0109187	0.0303103	62420.2	1.73716e-14	4.82237e-14	9.93105e-08
URUGUAY	858	South America	178690	97631.9	22.3578	81.0814	148.399	14488455	0.180937	0.331159	32331.7	1.20311e-12	2.20199e-12	2.14984e-07	24.902	60.0755	109.953	10734910	0.0227251	0.0415926	4060.76	0.177997	0.325779	31806.4	2.39433e-12	4.38222e-12	4.27844e-07	15.0815	21.0059	38.4459	3753545	0.00293952	0.00538005	525.264	1.18881e-14	2.17581e-14	2.12429e-09
UZBEKISTAN	860	Central Asia	113253	105487	25.8686	70.0772	75.2368	7936480	0.0389795	0.0418495	4414.57	4.6915e-15	5.03692e-15	5.31328e-10	24.3474	61.4439	65.968	6958738	0.237021	0.254473	26843.5	0	0	0	0	0	0	36.6955	8.63322	9.26887	977742	0.0389795	0.0418495	4414.57	9.38299e-15	1.00738e-14	1.06266e-09
YEMEN	887	Western Asia	41736.4	41631.2	53.0503	34.1714	34.2577	1.42619e+06	0.298371	0.299125	12452.9	9.00044e-13	9.02318e-13	3.75646e-08	50.8917	29.3957	29.47	1.22687e+06	0.00599969	0.00601485	250.406	0.292715	0.293455	12216.9	1.79094e-12	1.79547e-12	7.47475e-08	66.3367	4.77564	4.7877	199318	0.00565548	0.00566977	236.039	9.14483e-15	9.16794e-15	3.81672e-10

## Sheet: Cassava_Country_level
Country	Country	Sub Region	Dry Production	Crop Area	Nutrient Use Efficiency	Fertiliser Input N&P			Nutrient Loading (N&P) to Aquatic Receptors			Aquatic Species Richness Impact Freshwater and Marine Combined			Nutrient Use Efficiency	N Input			N Load Freshwater			N Load Marine			N Marine Demersal Species Richness impact			Nutrient Use Efficiency	P Input			P Load Freshwater			P Freshwater Fish Species Richness impact
Name	Code		per country	per country		Per Tonne Crop	Per Hectare	Total	Per Tonne Crop	Per Hectare	Total	Per Tonne Crop	Per Hectare	Total	Nitrogen	Per Tonne Crop	Per Hectare	Total	Per Tonne Crop	Per Hectare	Total	Per Tonne Crop	Per Hectare	Total	Per Tonne Crop	Per Hectare	Total	Phopshours	Per Tonne Crop	Per Hectare	Total	Per Tonne Crop	Per Hectare	Total	Per Tonne Crop	Per Hectare	Total
			Tonne	ha	%	kg/tonne crop	kg/ha	kg	kg/tonne crop	kg/ha	kg	PDF.yr/tonne crop	PDF.yr/ha	PDF.yr	%	kg/tonne crop	kg/ha	kg	kg/tonne crop	kg/ha	kg	kg/tonne crop	kg/ha	kg	PDF.yr/tonne crop	PDF.yr/ha	PDF.yr	%	kg/tonne crop	kg/ha	kg	kg/tonne crop	kg/ha	kg	PDF.yr/tonne crop	PDF.yr/ha	PDF.yr
ANGOLA	24	Middle Africa	1.40525e+06	566452	14.389	5.43747	13.4892	7640991	0.0159563	0.0395843	22422.6	5.86054e-14	1.45388e-13	8.23551e-08	13.0512	4.99571	12.3933	7.02021e+06	0.00450948	0.0111871	6336.93	0.0144359	0.0358124	20286	1.10348e-13	2.73749e-13	1.55066e-07	29.5182	0.441761	1.09592	620784	0.00152042	0.00377184	2136.57	6.86326e-15	1.70263e-14	9.64457e-09
ARGENTINA	32	South America	53468.6	15753.6	5.86988	13.3291	45.2397	712686	0.0506008	0.171743	2705.55	1.75378e-13	5.95245e-13	9.37723e-09	7.45015	8.7515	29.7032	467931	0.0180488	0.061259	965.047	0.042704	0.14494	2283.32	3.45445e-13	1.17246e-12	1.84704e-08	2.84868	4.57755	15.5365	244755	0.00789683	0.0268024	422.233	5.3119e-15	1.80289e-14	2.8402e-10
BOLIVIA	68	South America	125706	37105.8	11.6399	6.72173	22.7717	844961	0.0304908	0.103296	3832.87	5.2599e-14	1.78193e-13	6.612e-09	11.3988	5.7199	19.3777	719025	0.0303482	0.102813	3814.95	0.0221454	0.0750237	2783.81	7.19277e-14	2.43675e-13	9.04174e-09	13.0162	1.00183	3.39398	125936	0.00834537	0.0282722	1049.06	3.32702e-14	1.12712e-13	4.18226e-09
BRAZIL	76	South America	6.7495e+06	1.56206e+06	3.73078	20.9715	90.6158	141546944	0.0307683	0.132947	207671	2.89736e-13	1.25192e-12	1.95557e-06	4.46674	14.5968	63.0713	98520872	0.0159793	0.0690451	107852	0.0254138	0.109811	171530	1.65242e-13	7.13996e-13	1.1153e-06	2.04559	6.3747	27.5445	43026076	0.00535453	0.0231364	36140.4	4.14229e-13	1.78985e-12	2.79584e-06
MYANMAR	104	South-eastern Asia	30829.3	8580.81	38.4549	2.03459	7.30993	62725.1	0.0259489	0.0932299	799.989	1.37735e-13	4.94856e-13	4.24627e-09	32.7672	1.98979	7.14897	61344	0.00563139	0.0202326	173.612	0.0233762	0.0839864	720.671	2.44036e-13	8.76778e-13	7.52346e-09	291.074	0.0447996	0.160957	1381.14	0.00257279	0.00924357	79.3173	3.14335e-14	1.12935e-13	9.69075e-10
BURUNDI	108	Eastern Africa	199734	69219.9	13.0496	5.99558	17.3002	1.19752e+06	0.0262664	0.0757916	5246.29	4.59356e-14	1.32547e-13	9.17489e-09	12.5934	5.17731	14.9391	1.03408e+06	0.0126607	0.0365323	2528.76	0	0	0	0	0	0	15.936	0.818272	2.36112	163437	0.0262664	0.0757916	5246.29	9.18712e-14	2.65094e-13	1.83498e-08
CAMBODIA	116	South-eastern Asia	46944.2	14267.4	8.34482	9.37588	30.8495	440143	0.0201096	0.0661669	944.03	7.48024e-13	2.46123e-12	3.51154e-08	8.43492	7.72977	25.4333	362868	0.00189249	0.00622687	88.8413	0.0188503	0.0620232	884.911	1.49035e-12	4.90371e-12	6.99633e-08	7.92174	1.6461	5.41619	77275	0.00125936	0.00414368	59.1196	5.69685e-15	1.87444e-14	2.67434e-10
CAMEROON	120	Middle Africa	528675	132444	2.97567	26.2932	104.955	13900556	0.0516277	0.206082	27294.2	1.22536e-13	4.89126e-13	6.47815e-08	3.12966	20.8329	83.1587	11013838	0.00770247	0.030746	4072.1	0.0489932	0.195566	25901.5	2.25191e-13	8.98894e-13	1.19053e-07	2.38815	5.46029	21.7958	2.88672e+06	0.0026345	0.0105161	1392.79	1.98805e-14	7.93571e-14	1.05103e-08
CENTRAL AFRICAN REPUBLIC	140	Middle Africa	171341	180718	0.618522	126.495	119.932	21673804	0.104666	0.099235	17933.6	1.23815e-13	1.17391e-13	2.12146e-08	0.649637	100.364	95.1562	17196440	0.0361834	0.0343059	6199.7	0.0930887	0.0882585	15949.9	2.44772e-13	2.32072e-13	4.19395e-08	0.499019	26.1313	24.7754	4477363	0.0115771	0.0109764	1983.64	2.85821e-15	2.70991e-15	4.8973e-10
SRI LANKA	144	Southern Asia	77856	27899.8	2.83544	27.5936	77.0015	2148324	0.105163	0.293464	8187.57	8.96165e-12	2.5008e-11	6.97718e-07	3.08667	21.1231	58.9452	1644558	0.0661586	0.18462	5150.84	0.0773717	0.21591	6023.85	5.18567e-14	1.44709e-13	4.03735e-09	2.01531	6.47048	18.0563	503766	0.0277913	0.0775532	2163.72	1.78714e-11	4.98713e-11	1.3914e-06
CHAD	148	Middle Africa	60133.2	19351.9	24.1455	3.24036	10.069	194853	0.000816771	0.002538	49.1151	1.29521e-16	4.02469e-16	7.78854e-12	21.445	3.04033	9.4474	182825	0.00100147	0.00311192	60.2215	7.79159e-05	0.000242113	4.68534	2.44334e-16	7.59234e-16	1.46926e-11	65.1899	0.200031	0.621567	12028.5	0.000738855	0.00229589	44.4297	1.47085e-17	4.57047e-17	8.84472e-13
CHINA	156	Eastern Asia	1.20236e+06	235757	3.09401	25.2876	128.967	30404828	0.177754	0.906544	213724	1.23803e-12	6.31398e-12	1.48857e-06	2.93425	22.2204	113.324	26716944	0.196209	1.00067	235914	0.159359	0.812733	191608	1.49562e-12	7.62765e-12	1.79827e-06	4.25144	3.0672	15.6427	3.68788e+06	0.0183943	0.0938108	22116.6	9.80452e-13	5.00031e-12	1.17886e-06
COLOMBIA	170	South America	537088	168193	3.47559	22.5113	71.8847	12090532	0.144468	0.461325	77591.8	4.68113e-13	1.49481e-12	2.51418e-07	3.83995	16.9794	54.2199	9119434	0.0426363	0.13615	22899.5	0.128513	0.410377	69022.7	5.96751e-13	1.90559e-12	3.20508e-07	2.35725	5.53186	17.6648	2.9711e+06	0.0159547	0.0509477	8569.07	3.39475e-13	1.08404e-12	1.82328e-07
CONGO	178	Middle Africa	226385	81032.8	10.9174	7.16654	20.0215	1.6224e+06	0.0914372	0.255452	20700	2.68604e-13	7.50412e-13	6.0808e-08	10.2967	6.33213	17.6904	1.4335e+06	0.00503243	0.0140593	1139.27	0.0902008	0.251998	20420.1	3.33147e-13	9.30728e-13	7.54195e-08	15.6279	0.834407	2.33112	188897	0.00123634	0.00345403	279.89	2.04061e-13	5.70096e-13	4.61965e-08
CONGO D.C	180	Middle Africa	5.05447e+06	1.91572e+06	12.8531	6.08726	16.0607	30767862	0.034012	0.0897376	171912	6.75956e-14	1.78345e-13	3.4166e-07	12.1227	5.37833	14.1902	27184604	0.0103608	0.0273361	52368.5	0.0262683	0.0693067	132772	9.82967e-14	2.59347e-13	4.96838e-07	18.394	0.708929	1.87045	3.58326e+06	0.00774365	0.0204309	39140	3.68945e-14	9.73428e-14	1.86482e-07
COSTA RICA	188	Central America	21533.1	7354.63	3.18262	24.5835	71.9763	529360	0.124222	0.363701	2674.89	1.62131e-12	4.74692e-12	3.49119e-08	4.01965	16.2203	47.4903	349274	0.0157074	0.0459885	338.229	0.117318	0.343486	2526.21	1.57083e-13	4.59914e-13	3.3825e-09	1.55921	8.36321	24.486	180086	0.00690444	0.020215	148.674	3.08554e-12	9.03393e-12	6.64412e-08
CUBA	192	Caribbean	145308	95855.7	1.49524	52.3259	79.3208	7603349	0.0317463	0.0481242	4612.97	1.86221e-13	2.82292e-13	2.70593e-08	1.68482	38.6985	58.663	5623185	0.00152645	0.00231394	221.805	0.0300231	0.0455121	4362.59	3.48712e-14	5.28613e-14	5.06706e-09	0.956896	13.6274	20.6578	1.98016e+06	0.00172312	0.00261208	250.382	3.3757e-13	5.11723e-13	4.90515e-08
BENIN	204	Western Africa	534220	149225	9.4708	8.26119	29.5747	4.41329e+06	0.0209274	0.0749194	11179.8	2.7313e-14	9.77794e-14	1.45911e-08	9.49055	6.86999	24.5943	3.67008e+06	0.00131718	0.00471545	703.663	0.0198309	0.0709938	10594	5.03024e-14	1.80081e-13	2.68725e-08	9.37322	1.3912	4.98043	743205	0.00109656	0.00392563	585.802	4.32358e-15	1.54782e-14	2.30974e-09
DOMINICAN REPUBLIC	214	Caribbean	35602.6	17403.1	1.9481	40.1622	82.1626	1.42988e+06	0.11622	0.23776	4137.75	2.42299e-12	4.95688e-12	8.62649e-08	1.96701	33.1468	67.8106	1.18011e+06	0.103931	0.212619	3700.23	0.069044	0.141248	2458.15	4.89501e-14	1.0014e-13	1.74275e-09	1.85875	7.01547	14.352	249769	0.0471763	0.0965118	1679.6	4.79704e-12	9.81362e-12	1.70787e-07
ECUADOR	218	South America	31833.9	21090.1	2.22211	35.2098	53.1465	1.12087e+06	0.430549	0.649881	13706.1	2.68075e-13	4.04638e-13	8.53386e-09	2.29279	28.437	42.9234	905259	0.128771	0.19437	4099.28	0.365722	0.552029	11642.4	3.83077e-13	5.78225e-13	1.21948e-08	1.92532	6.77289	10.2231	215607	0.0648275	0.0978521	2063.71	1.53072e-13	2.31051e-13	4.87289e-09
EQUATORIAL GUINEA	226	Middle Africa	14047.4	16017	3.31047	23.6341	20.7278	331998	0.285116	0.250055	4005.13	1.70615e-13	1.49634e-13	2.39669e-09	3.16365	20.6091	18.0748	289504	0.00510891	0.00448066	71.7669	0.284361	0.249393	3994.53	3.35725e-13	2.9444e-13	4.71606e-09	4.31067	3.02505	2.65306	42494.1	0.000754552	0.000661764	10.5995	5.50456e-15	4.82765e-15	7.73246e-11
GABON	266	Middle Africa	77678	44300.7	4.11523	19.0123	33.3366	1476837	0.0993325	0.174172	7715.94	2.22683e-13	3.90457e-13	1.72975e-08	4.15832	15.6794	27.4927	1.21795e+06	0.00889259	0.0155925	690.758	0.0947675	0.166168	7361.35	1.883e-13	3.30171e-13	1.46268e-08	3.91252	3.33289	5.84397	258892	0.00456498	0.00800435	354.598	2.57065e-13	4.50744e-13	1.99683e-08
GHANA	288	Western Africa	2688053	678332	15.1833	5.15304	20.4202	13851639	0.00826143	0.0327379	22207.2	1.70455e-14	6.7547e-14	4.58193e-08	14.6259	4.45783	17.6652	11982886	0.00809005	0.0320588	21746.5	0.00443225	0.0175639	11914.1	8.73896e-15	3.46302e-14	2.34908e-08	18.757	0.695207	2.75493	1.86875e+06	0.00382918	0.015174	10293	2.53521e-14	1.00464e-13	6.81477e-08
GUINEA	324	Western Africa	286507	159925	5.87766	13.3114	23.8476	3.81382e+06	0.0908922	0.162834	26041.3	2.48633e-12	4.45429e-12	7.12352e-07	5.76307	11.3134	20.2681	3.24137e+06	0.017713	0.031733	5074.9	0.0795566	0.142526	22793.5	1.2442e-13	2.229e-13	3.56473e-08	6.52648	1.99801	3.57946	572446	0.0113356	0.0203078	3247.72	4.84824e-12	8.68567e-12	1.38906e-06
GUYANA	328	South America	10134.3	2734.97	17.4661	4.47954	16.5987	45397	0.0374293	0.138692	379.32	7.30571e-14	2.7071e-13	7.40383e-10	15.2768	4.26791	15.8145	43252.3	0.00833336	0.0308789	84.4529	0.0349595	0.129541	354.29	1.44139e-13	5.341e-13	1.46075e-09	61.6179	0.211627	0.784173	2144.69	0.00246982	0.00915182	25.03	1.97509e-15	7.3186e-15	2.00162e-11
HAITI	332	Caribbean	104879	74127.6	1.71749	45.5549	64.4528	4777734	0.0950388	0.134465	9967.55	4.2924e-14	6.07306e-14	4.50181e-09	1.80181	36.1859	51.1973	3.79513e+06	0.00334842	0.00473748	351.178	0.0915081	0.129469	9597.25	7.36985e-14	1.04272e-13	7.72941e-09	1.39183	9.36895	13.2556	982603	0.00353073	0.00499542	370.299	1.21494e-14	1.71895e-14	1.27422e-09
INDIA	356	Southern Asia	2021988	240003	9.90772	7.89687	66.5299	15967374	0.0208549	0.175699	42168.3	1.01821e-13	8.57823e-13	2.0588e-07	10.1932	6.39641	53.8887	12933463	0.00941144	0.0792899	19029.8	0.0171536	0.144516	34684.3	4.027e-14	3.39268e-13	8.14255e-08	8.69067	1.50046	12.6411	3.03391e+06	0.00370133	0.0311831	7484.04	1.63371e-13	1.37638e-12	3.30335e-07
INDONESIA	360	South-eastern Asia	4940607	1.17722e+06	4.58961	17.0472	71.5443	84223440	0.0966922	0.405801	477718	3.14141e-13	1.3184e-12	1.55205e-06	4.48735	14.5297	60.9789	71785696	0.00626137	0.0262779	30935	0.09518	0.399455	470247	2.53626e-13	1.06443e-12	1.25307e-06	5.17984	2.51745	10.5653	12437745	0.00151214	0.0063462	7470.88	3.74656e-13	1.57237e-12	1.85103e-06
COTE D'IVOIRE	384	Western Africa	533262	310609	8.2475	9.4865	16.2867	5058797	0.0343463	0.0589668	18315.6	8.40293e-14	1.44264e-13	4.48097e-08	7.7216	8.44385	14.4967	4502787	0.0130783	0.0224533	6974.19	0.0281041	0.0482501	14986.9	4.50363e-14	7.73197e-14	2.40162e-08	12.5065	1.04266	1.79007	556010	0.00624217	0.0107168	3328.72	1.23022e-13	2.11208e-13	6.56032e-08
KENYA	404	Eastern Africa	160826	62095.7	5.14026	15.221	39.422	2.44794e+06	0.0102103	0.0264444	1642.08	4.91326e-14	1.27252e-13	7.90179e-09	5.2207	12.4887	32.3454	2.00851e+06	0.0119084	0.0308425	1915.19	0.00290155	0.00751493	466.645	2.94657e-14	7.63152e-14	4.73885e-09	4.77256	2.73229	7.07654	439423	0.00730876	0.0189295	1175.44	6.87994e-14	1.78188e-13	1.10647e-08
LAO PEOPLEâ€™S DEMOCRATIC REPUBLIC	418	South-eastern Asia	27787.9	4977.82	13.346	5.86244	32.7262	162905	0.0747426	0.417239	2076.94	2.93323e-13	1.63743e-12	8.15082e-09	13.8473	4.70849	26.2844	130839	0.0137925	0.0769942	383.264	0.0691406	0.385966	1921.27	5.64411e-13	3.15074e-12	1.56838e-08	11.3003	1.15395	6.44176	32065.9	0.00560203	0.0312724	155.669	2.22345e-14	1.2412e-13	6.17849e-10
LIBERIA	430	Western Africa	111598	52177.2	6.01966	12.9974	27.7991	1450482	0.0639952	0.136874	7141.72	1.59133e-13	3.40356e-13	1.77588e-08	6.00018	10.8663	23.2411	1.21266e+06	0.00170213	0.00364055	189.953	0.0634451	0.135698	7080.33	9.42005e-14	2.01478e-13	1.05126e-08	6.11896	2.13108	4.558	237824	0.000550178	0.00117673	61.3986	2.24065e-13	4.79235e-13	2.50051e-08
MADAGASCAR	450	Eastern Africa	643154	303639	5.53966	14.1236	29.916	9083656	0.0850759	0.180204	54716.9	4.46589e-14	9.45945e-14	2.87225e-08	5.61709	11.6074	24.5864	7465370	0.00488435	0.0103458	3141.39	0.0831591	0.176144	53484.1	6.92895e-14	1.46766e-13	4.45638e-08	5.18248	2.51617	5.32965	1.61829e+06	0.00191682	0.00406012	1232.81	2.00283e-14	4.2423e-14	1.28812e-08
MALAWI	454	Eastern Africa	359369	89796.8	12.9836	6.02609	24.1166	2.16559e+06	0.00969321	0.0387925	3483.44	5.98879e-14	2.39673e-13	2.15219e-08	13.223	4.93082	19.7333	1.77199e+06	0.00157062	0.00628568	564.434	0.00319328	0.0127796	1147.57	8.29698e-14	3.32048e-13	2.98168e-08	11.9058	1.09527	4.38328	393605	0.00649993	0.0260129	2335.87	3.68059e-14	1.47298e-13	1.32269e-08
MALAYSIA	458	South-eastern Asia	123403	36584.1	4.5214	17.3044	58.3699	2.13541e+06	0.205862	0.694399	25403.9	2.94481e-13	9.93325e-13	3.63399e-08	4.44136	14.6802	49.5183	1.81158e+06	0.0121391	0.0409466	1497.99	0.203443	0.68624	25105.4	4.95675e-13	1.67198e-12	6.11678e-08	4.96919	2.62417	8.85167	323830	0.00241896	0.00815946	298.506	9.32876e-14	3.14672e-13	1.1512e-08
MEXICO	484	Central America	5695.77	1338.31	5.5368	14.1309	60.1401	80486.4	0.107702	0.458374	613.448	1.46231e-13	6.22349e-13	8.32898e-10	8.11762	8.03191	34.1833	45748	0.0275982	0.117456	157.193	0.0951153	0.404804	541.755	1.74103e-13	7.40969e-13	9.9165e-10	2.13806	6.09899	25.9569	34738.5	0.0125871	0.0535698	71.6933	1.18359e-13	5.03728e-13	6.74146e-10
MOZAMBIQUE	508	Eastern Africa	1.00811e+06	519840	19.3295	4.0477	7.84962	4080544	0.0201907	0.0391554	20354.5	8.98665e-14	1.74276e-13	9.05957e-08	16.7489	3.89279	7.5492	3.92437e+06	0.00245939	0.00476945	2479.35	0.018824	0.036505	18976.8	1.72898e-13	3.35298e-13	1.74301e-07	84.176	0.154914	0.30042	156170	0.00136669	0.0026504	1377.78	6.83489e-15	1.32548e-14	6.89035e-09
NICARAGUA	558	Central America	22669.2	6523.55	14.5496	5.37748	18.6867	121903	0.0310543	0.107913	703.977	1.95027e-14	6.77717e-14	4.42112e-10	13.4415	4.85064	16.8559	109960	0.00349846	0.0121571	79.3073	0.0267321	0.0928937	605.997	1.36263e-14	4.73511e-14	3.08897e-10	24.7512	0.526844	1.83077	11943.2	0.00432215	0.0150194	97.9799	2.53792e-14	8.81923e-14	5.75327e-10
NIGER	562	Western Africa	37818.2	6104.09	67.4124	1.16062	7.19067	43892.5	5.62696e-05	0.000348622	2.12802	4.23674e-17	2.62489e-16	1.60226e-12	57.3668	1.13655	7.04153	42982.1	2.96397e-05	0.000183634	1.12092	2.26668e-05	0.000140433	0.857217	8.43914e-17	5.22851e-16	3.19153e-12	541.723	0.0240713	0.149135	910.334	3.36029e-05	0.000208188	1.2708	3.43354e-19	2.12727e-18	1.2985e-14
NIGERIA	566	Western Africa	9135456	2.76565e+06	9.01146	8.68228	28.6792	79316568	0.0265859	0.0878184	242875	3.09005e-14	1.0207e-13	2.8229e-07	8.88548	7.33782	24.2382	67034296	0.00216183	0.00714093	19749.3	0.0254275	0.0839918	232292	5.12344e-14	1.69237e-13	4.68049e-07	9.69905	1.34446	4.44101	12282269	0.00115843	0.00382653	10582.8	1.05666e-14	3.49036e-14	9.65311e-08
PANAMA	591	Central America	9110.54	2379.54	4.43188	17.6539	67.5914	160837	0.132072	0.505662	1203.24	1.65891e-12	6.35147e-12	1.51136e-08	4.97793	13.0978	50.1475	119328	0.0181138	0.0693523	165.027	0.127444	0.487945	1161.09	7.09467e-14	2.71633e-13	6.46363e-10	2.8621	4.55609	17.4439	41508.4	0.00462758	0.0177176	42.1597	3.24688e-12	1.24313e-11	2.95808e-08
PAPUA NEW GUINEA	598	Melanesia	37021.1	11202.4	26.1009	2.9976	9.90635	110974	0.0145802	0.0481841	539.775	5.40436e-14	1.78602e-13	2.00076e-09	30.0815	2.16744	7.16289	80241.2	0.00651469	0.0215295	241.181	0.0117069	0.0386886	433.403	5.54027e-17	1.83093e-16	2.05107e-12	15.708	0.830153	2.74346	30733.2	0.00287328	0.00949552	106.372	1.08032e-13	3.5702e-13	3.99946e-09
PARAGUAY	600	South America	1.16663e+06	238787	17.3998	4.4966	21.9688	5245856	0.00866894	0.0423533	10113.4	1.72426e-14	8.42413e-14	2.01157e-08	17.2936	3.77018	18.4198	4398401	0.00529714	0.0258799	6179.8	0.00496596	0.0242619	5793.43	3.23478e-14	1.5804e-13	3.77378e-08	17.9512	0.726414	3.549	847455	0.00370298	0.0180914	4320	2.13746e-15	1.04429e-14	2.49362e-09
PERU	604	South America	249263	78457.2	3.74342	20.9007	66.4025	5.20975e+06	0.166644	0.529435	41538	1.79226e-13	5.69411e-13	4.46744e-08	3.96659	16.4373	52.2222	4.0972e+06	0.118001	0.374896	29413.3	0.130365	0.414176	32495.1	2.51163e-13	7.97957e-13	6.26055e-08	2.92156	4.46337	14.1803	1112550	0.0362788	0.115259	9042.93	1.0729e-13	3.40864e-13	2.67433e-08
PHILIPPINES	608	South-eastern Asia	512542	194184	5.99599	13.0487	34.4416	6688018	0.0404121	0.106666	20712.9	3.21966e-12	8.49817e-12	1.65021e-06	6.26769	10.4026	27.4571	5.33174e+06	0.00181195	0.00478256	928.698	0.0365512	0.0964755	18734	1.18044e-13	3.11572e-13	6.05023e-08	4.92786	2.64618	6.98448	1.35628e+06	0.00386091	0.0101907	1978.88	6.32128e-12	1.66848e-11	3.23992e-06
GUINEA-BISSAU	624	Western Africa	10685.3	2186.77	36.6067	2.13731	10.4436	22837.8	0.0277435	0.135564	296.447	1.62474e-13	7.93904e-13	1.73608e-09	32.9041	1.98151	9.68233	21173	0.00121821	0.00595258	13.0169	0.0271839	0.13283	290.467	3.17963e-13	1.55367e-12	3.39752e-09	83.6969	0.1558	0.761291	1664.77	0.000559597	0.00273438	5.97945	6.98583e-15	3.41351e-14	7.46455e-11
TIMOR-LESTE	626	South-eastern Asia	15225.6	10337.2	1.47053	53.2053	78.3661	810082	0.32419	0.477499	4935.98	1.0156e-13	1.49587e-13	1.54631e-09	1.51767	42.9606	63.2766	654101	0.00274081	0.00403694	41.7304	0.323431	0.476381	4924.42	1.98795e-13	2.92805e-13	3.02678e-09	1.27285	10.2447	15.0894	155982	0.000759174	0.00111819	11.5589	4.32404e-15	6.36888e-15	6.58361e-11
RWANDA	646	Eastern Africa	169223	102178	5.50142	14.2218	23.5534	2.40664e+06	0.0383334	0.0634859	6486.88	9.92369e-15	1.64351e-14	1.67931e-09	5.462	11.937	19.7695	2.02001e+06	0.0844238	0.139819	14286.4	0	0	0	0	0	0	5.70738	2.28476	3.78391	386633	0.0383334	0.0634859	6486.88	1.98474e-14	3.28702e-14	3.35862e-09
SENEGAL	686	Western Africa	19687.1	12689.7	2.78877	28.0554	43.526	552330	0.00867496	0.0134586	170.785	9.51975e-14	1.47692e-13	1.87416e-09	2.85929	22.8029	35.3771	448923	0.00134626	0.00208863	26.504	0.0083055	0.0128854	163.511	1.8978e-13	2.94431e-13	3.73623e-09	2.48261	5.25253	8.14894	103407	0.000369456	0.000573185	7.27352	6.14604e-16	9.53515e-16	1.20998e-11
SIERRA LEONE	694	Western Africa	68507.2	40192	2.76594	28.2869	48.2151	1.93786e+06	0.092707	0.158019	6351.1	1.54332e-13	2.63058e-13	1.05728e-08	2.81152	23.1903	39.528	1.58871e+06	0.00370015	0.00630691	253.487	0.0919074	0.156656	6296.33	3.06616e-13	5.22628e-13	2.10055e-08	2.55857	5.09659	8.68715	349154	0.000799613	0.00136294	54.7793	2.04672e-15	3.48864e-15	1.40215e-10
VIET NAM	704	South-eastern Asia	837572	253239	2.01055	38.9147	128.708	32593844	0.388324	1.28436	325250	2.48268e-12	8.21131e-12	2.07943e-06	2.22223	29.3399	97.0398	24574308	0.0569666	0.188413	47713.7	0.370985	1.22701	310727	4.79572e-12	1.58615e-11	4.01676e-06	1.36192	9.57474	31.6678	8019535	0.017339	0.0573476	14522.7	1.69647e-13	5.61097e-13	1.42092e-07
SOMALIA	706	Eastern Africa	24014.7	8939.88	36.3513	2.15233	5.78167	51687.5	0.00061098	0.00164124	14.6725	2.48236e-15	6.66822e-15	5.96131e-11	30.2928	2.15233	5.78167	51687.4	9.7009e-05	0.000260589	2.32964	0.000470634	0.00126424	11.3021	4.95795e-15	1.33182e-14	1.19063e-10	6.60048e+06	1.97562e-06	5.30697e-06	0.0474437	0.000140347	0.000377005	3.37038	6.7744e-18	1.81977e-17	1.62685e-13
ZIMBABWE	716	Eastern Africa	55728.6	36845.1	6.95927	11.2426	17.0045	626532	0.0304082	0.0459926	1694.6	1.37569e-13	2.08075e-13	7.66655e-09	6.70135	9.72938	14.7158	542205	0.0374387	0.0566264	2086.41	0.0114864	0.0173732	640.119	1.04341e-13	1.57817e-13	5.81477e-09	8.61762	1.51318	2.2887	84327.3	0.0189218	0.0286194	1054.49	1.70798e-13	2.58333e-13	9.51832e-09
THAILAND	764	South-eastern Asia	5.72782e+06	1.06102e+06	7.7135	10.1433	54.7577	58098724	0.0165293	0.0892321	94676.6	1.71247e-13	9.24462e-13	9.80869e-07	7.88984	8.26379	44.6115	47333500	0.00591823	0.0319491	33898.5	0.0148125	0.0799643	84843.3	3.1743e-13	1.71362e-12	1.81818e-06	6.93815	1.87946	10.1462	10765225	0.00171676	0.00926782	9833.3	2.5063e-14	1.35301e-13	1.43556e-07
TOGO	768	Western Africa	195023	99567.2	5.14389	15.2103	29.7925	2.96636e+06	0.0302785	0.0593068	5905.01	7.12786e-14	1.39614e-13	1.3901e-08	5.16941	12.6127	24.7046	2.45976e+06	0.00694267	0.0135987	1353.98	0.0269617	0.0528102	5258.16	9.47329e-14	1.85554e-13	1.84751e-08	5.01998	2.59762	5.08799	506597	0.00331679	0.00649663	646.851	4.78244e-14	9.36741e-14	9.32687e-09
UGANDA	800	Eastern Africa	1.2953e+06	350210	6.77078	11.5555	42.7399	14967934	0.00602529	0.0222855	7804.59	1.00321e-15	3.71051e-15	1.29946e-09	6.89343	9.45829	34.9829	12251361	0.00948149	0.0350688	12281.4	6.37532e-05	0.000235801	82.5798	1.44284e-16	5.33657e-16	1.86892e-10	6.21768	2.09725	7.75699	2.71657e+06	0.00596154	0.0220497	7722.01	1.86213e-15	6.88737e-15	2.41202e-09
TANZANIA	834	Eastern Africa	1.01025e+06	383282	11.2322	6.96567	18.3601	7.03708e+06	0.0122327	0.0322429	12358.1	7.69239e-14	2.02755e-13	7.77124e-08	10.9012	5.98098	15.7646	6.04229e+06	0.00446885	0.0117789	4514.66	0.00800296	0.0210941	8085.01	9.08621e-14	2.39493e-13	9.17935e-08	13.2427	0.984696	2.59545	994791	0.00422975	0.0111487	4273.12	6.29856e-14	1.66017e-13	6.36313e-08
VENEZUELA (BOLIVARIAN REPUBLIC OF)	862	South America	165188	43302.9	3.13181	24.9823	95.3	4.12677e+06	0.0409395	0.156172	6762.7	9.31724e-13	3.55424e-12	1.53909e-07	3.4813	18.7286	71.444	3.09374e+06	0.0350518	0.133712	5790.13	0.0302852	0.115529	5002.73	1.20114e-13	4.58199e-13	1.98414e-08	2.08516	6.2537	23.856	1.03303e+06	0.0106543	0.0406431	1759.97	1.74333e-12	6.65028e-12	2.87977e-07
ZAMBIA	894	Eastern Africa	208570	152738	6.98737	11.1973	15.2904	2.33543e+06	0.0110112	0.0150362	2296.6	1.83572e-14	2.50675e-14	3.82875e-09	6.49749	10.0346	13.7027	2.09292e+06	0.0288112	0.0393429	6009.16	0.00169956	0.00232082	354.477	5.8919e-15	8.04563e-15	1.22887e-09	11.2154	1.16269	1.5877	242502	0.00931161	0.0127154	1942.12	3.08225e-14	4.20893e-14	6.42864e-09

## Sheet: Cotton_Country_level
Country	Country	Sub Region	Dry Production	Crop Area	Nutrient Use Efficiency	Fertiliser Input N&P			Nutrient Loading (N&P) to Aquatic Receptors			Aquatic Species Richness Impact Freshwater and Marine Combined			Nutrient Use Efficiency	N Input			N Load Freshwater			N Load Marine			N Marine Demersal Species Richness impact			Nutrient Use Efficiency	P Input			P Load Freshwater			P Freshwater Fish Species Richness impact
Name	Code		per country	per country		Per Tonne Crop	Per Hectare	Total	Per Tonne Crop	Per Hectare	Total	Per Tonne Crop	Per Hectare	Total	Nitrogen	Per Tonne Crop	Per Hectare	Total	Per Tonne Crop	Per Hectare	Total	Per Tonne Crop	Per Hectare	Total	Per Tonne Crop	Per Hectare	Total	Phopshours	Per Tonne Crop	Per Hectare	Total	Per Tonne Crop	Per Hectare	Total	Per Tonne Crop	Per Hectare	Total
			Tonne	ha	%	kg/tonne crop	kg/ha	kg	kg/tonne crop	kg/ha	kg	PDF.yr/tonne crop	PDF.yr/ha	PDF.yr	%	kg/tonne crop	kg/ha	kg	kg/tonne crop	kg/ha	kg	kg/tonne crop	kg/ha	kg	PDF.yr/tonne crop	PDF.yr/ha	PDF.yr	%	kg/tonne crop	kg/ha	kg	kg/tonne crop	kg/ha	kg	PDF.yr/tonne crop	PDF.yr/ha	PDF.yr
ANGOLA	24	Middle Africa	8752.07	10197.4	286.293	11.0223	9.46004	96467.6	0.0397077	0.0340798	347.525	1.66642e-13	1.43023e-13	1.45846e-09	243.499	10.9569	9.40398	95896	0.0104823	0.00899661	91.7419	0.0354624	0.0304362	310.369	3.13199e-13	2.68808e-13	2.74114e-09	7465.38	0.0653149	0.0560575	571.64	0.0042453	0.0036436	37.1552	2.00841e-14	1.72375e-14	1.75778e-10
AZERBAIJAN	31	Western Asia	104078	113128	41.465	76.1027	70.0145	7.9206e+06	0.15908	0.146354	16556.7	2.85961e-15	2.63084e-15	2.97622e-10	40.6233	65.6766	60.4225	6.83548e+06	0.116843	0.107495	12160.7	0.101317	0.0932116	10544.9	0	0	0	46.7676	10.426	9.59194	1.08512e+06	0.057763	0.0531419	6011.85	5.71923e-15	5.26169e-15	5.95245e-10
ARGENTINA	32	South America	511075	464187	37.5246	84.0942	92.5887	42978432	0.015486	0.0170503	7914.53	5.30622e-14	5.84221e-14	2.71187e-08	37.544	71.0633	78.2415	36318644	0.00648337	0.00713826	3313.48	0.0124702	0.0137298	6373.19	1.0541e-13	1.16057e-13	5.38723e-08	37.4186	13.0309	14.3472	6.65979e+06	0.00301588	0.00332051	1541.34	7.14476e-16	7.86646e-16	3.65151e-10
AUSTRALIA	36	Australia and New Zealand	1.43133e+06	402480	79.0526	39.9177	141.959	57135620	0.0103407	0.0367745	14801	9.30721e-15	3.30991e-14	1.33217e-08	74.4274	35.847	127.482	51309096	0.00869214	0.0309118	12441.4	0.00679552	0.0241668	9726.66	1.65855e-14	5.89829e-14	2.37394e-08	119.783	4.07069	14.4766	5.82652e+06	0.00354519	0.0126077	5074.36	2.02891e-15	7.21539e-15	2.90405e-09
BANGLADESH	50	Southern Asia	28365.6	17715.1	50.2121	62.8454	100.629	1.78265e+06	0.11203	0.179384	3177.81	4.89457e-13	7.83725e-13	1.38838e-08	53.7753	49.6139	79.4424	1407329	0.0105308	0.0168621	298.714	0.110417	0.176801	3132.04	9.39417e-13	1.50421e-12	2.66471e-08	36.8514	13.2315	21.1865	375320	0.00161335	0.00258331	45.7635	3.94974e-14	6.32436e-14	1.12037e-09
BOLIVIA	68	South America	61320.8	68962.2	264.275	11.9406	10.6175	732207	0.0251402	0.0223545	1541.62	3.65054e-14	3.24604e-14	2.23854e-09	238.079	11.2064	9.96463	687182	0.0233952	0.0208029	1434.61	0.0145987	0.0129811	895.202	6.58394e-14	5.8544e-14	4.03733e-09	664.083	0.734245	0.652887	45024.5	0.0105415	0.00937346	646.414	7.17135e-15	6.37673e-15	4.39753e-10
BRAZIL	76	South America	1.5534e+06	729645	38.9296	81.0592	172.573	125917392	0.0297084	0.0632486	46149	4.81578e-14	1.02527e-13	7.48083e-08	51.1621	52.148	111.022	81006696	0.0695406	0.14805	108024	0.01409	0.0299973	21887.4	8.62025e-14	1.83523e-13	1.33907e-07	16.8654	28.9112	61.5514	44910700	0.0156184	0.0332513	24261.7	1.01131e-14	2.15307e-14	1.57097e-08
BULGARIA	100	Eastern Europe	7788.1	9121.22	11.3367	278.353	237.67	2.16784e+06	0.86149	0.735579	6709.37	6.82865e-13	5.8306e-13	5.31822e-09	12.4938	213.545	182.334	1.66311e+06	2.75783	2.35476	21478.3	0.581129	0.496193	4525.89	1.06208e-12	9.06847e-13	8.27155e-09	7.52374	64.8082	55.3361	504732	0.280362	0.239385	2183.49	3.03655e-13	2.59274e-13	2.36489e-09
MYANMAR	104	South-eastern Asia	173046	285898	49.5286	63.7126	38.5636	11025244	0.33582	0.203263	58112.5	3.36067e-12	2.03412e-12	5.81551e-07	50.5158	52.8152	31.9676	9139475	0.062447	0.0377976	10806.2	0.312494	0.189144	54075.9	1.51979e-12	9.1989e-13	2.62995e-07	44.7443	10.8975	6.59596	1.88577e+06	0.0233266	0.014119	4036.59	5.20154e-12	3.14836e-12	9.00108e-07
CAMEROON	120	Middle Africa	181488	185089	32.7935	96.2264	94.3546	17463966	0.0962324	0.0943604	17465	1.49567e-13	1.46657e-13	2.71446e-08	34.1528	78.1196	76.5999	14177780	0.0328675	0.0322282	5965.07	0.0814624	0.0798778	14784.5	2.8166e-13	2.76181e-13	5.1118e-08	26.929	18.1069	17.7547	3.28619e+06	0.01477	0.0144827	2680.58	1.74729e-14	1.71331e-14	3.17113e-09
CENTRAL AFRICAN REPUBLIC	140	Middle Africa	24453.9	39328.3	39.9823	78.9249	49.0747	1.93002e+06	0.0450724	0.0280255	1102.2	5.11291e-14	3.17915e-14	1.25031e-09	41.1824	64.785	40.2826	1584249	0.0323482	0.0201138	791.042	0.033124	0.0205962	810.013	1.01613e-13	6.31819e-14	2.48484e-09	34.484	14.1399	8.79203	345776	0.0119483	0.00742935	292.184	6.45098e-16	4.01115e-16	1.57752e-11
CHAD	148	Middle Africa	90556.5	155671	117.934	26.7573	15.5652	2.42305e+06	0.00672245	0.00391057	608.761	1.88728e-15	1.09787e-15	1.70906e-10	111.986	23.8244	13.8591	2157454	0.00744349	0.00433001	674.056	0.00147835	0.000859982	133.874	3.667e-15	2.13316e-15	3.32071e-10	166.25	2.93294	1.70614	265597	0.0052441	0.00305059	474.887	1.0756e-16	6.25695e-17	9.74024e-12
CHINA	156	Eastern Asia	12069844	4.30046e+06	31.6579	99.6782	279.761	1203099904	0.148233	0.416036	1.78915e+06	1.06045e-12	2.9763e-12	1.27995e-05	32.2849	82.6393	231.939	997443584	0.134842	0.378453	1.62752e+06	0.139267	0.390873	1.68093e+06	2.11003e-12	5.9221e-12	2.54678e-05	28.617	17.0389	47.8219	205656272	0.00896566	0.0251634	108214	1.08647e-14	3.04933e-14	1.31135e-07
COLOMBIA	170	South America	92900.7	49298.2	90.3956	34.9088	65.7843	3.24305e+06	0.275765	0.519668	25618.7	7.7338e-13	1.4574e-12	7.18475e-08	83.2744	32.0387	60.3756	2.97641e+06	0.0868261	0.16362	8066.2	0.24015	0.452553	22310.1	5.96604e-13	1.12428e-12	5.54249e-08	169.889	2.87012	5.40863	266636	0.0356151	0.0671153	3308.66	9.50155e-13	1.79053e-12	8.827e-08
CONGO D.C	180	Middle Africa	21769.7	67576.8	111.598	28.2764	9.10919	615570	0.183336	0.0590613	3991.18	3.99738e-13	1.28775e-13	8.70218e-09	96.2082	27.7315	8.93365	603708	0.073977	0.0238315	1610.46	0.13771	0.0443629	2997.91	4.63779e-13	1.49405e-13	1.00963e-08	894.854	0.544893	0.175536	11862.2	0.0456262	0.0146984	993.27	3.35697e-13	1.08144e-13	7.30802e-09
BENIN	204	Western Africa	305689	312652	47.0815	67.0242	65.5314	20488532	0.0368352	0.0360148	11260.1	4.11478e-14	4.02314e-14	1.25784e-08	49.006	54.4423	53.2298	16642402	0.00451034	0.00440989	1378.76	0.0319835	0.0312712	9777.01	7.66777e-14	7.49699e-14	2.34395e-08	38.7543	12.5818	12.3016	3846129	0.00485167	0.00474361	1483.1	5.61791e-15	5.49278e-15	1.71733e-09
ECUADOR	218	South America	6440.66	5248.99	78.736	40.0782	49.1771	258130	0.464379	0.569806	2990.91	4.87974e-13	5.98758e-13	3.14288e-09	73.0831	36.5064	44.7943	235125	0.0820439	0.10067	528.417	0.427734	0.524841	2754.89	4.18342e-13	5.13317e-13	2.6944e-09	136.512	3.57185	4.38276	23005.1	0.036645	0.0449645	236.018	5.57607e-13	6.84199e-13	3.59135e-09
ETHIOPIA	231	Eastern Africa	42093	43574.2	284.258	11.1012	10.7238	467282	0.102554	0.0990679	4316.8	1.73986e-13	1.68071e-13	7.32358e-09	278.963	9.564	9.2389	402578	0.075394	0.0728312	3173.56	0.0202026	0.0195158	850.386	1.2805e-13	1.23697e-13	5.39002e-09	317.205	1.53717	1.48492	64704.3	0.0823514	0.0795521	3466.42	2.19921e-13	2.12445e-13	9.25713e-09
PALESTINE, STATE OF	275	Western Asia	27631.1	7415.75	39.674	79.5382	296.359	2197725	0.0367362	0.136879	1015.06	3.58233e-14	1.33477e-13	9.89835e-10	40.8012	65.3902	243.644	1.8068e+06	0.0059176	0.022049	163.51	0.0359748	0.134042	994.021	2.13135e-15	7.94143e-15	5.88916e-11	34.4643	14.148	52.7154	390924	0.000761435	0.00283711	21.0393	6.95152e-14	2.59014e-13	1.92078e-09
GHANA	288	Western Africa	26508.1	37399.1	194.044	16.2623	11.5265	431082	0.037734	0.0267455	1000.26	5.73162e-14	4.06251e-14	1.51934e-09	173.609	15.3679	10.8926	407374	0.0523556	0.0371091	1387.85	0.0136371	0.00966586	361.494	3.17359e-14	2.2494e-14	8.41257e-10	545.188	0.89437	0.63392	23708	0.0240969	0.0170796	638.762	8.28965e-14	5.87562e-14	2.19743e-09
GREECE	300	Southern Europe	1.00898e+06	357782	55.0627	57.3092	161.617	57823636	0.115573	0.325926	116610	8.45239e-12	2.38365e-11	8.52826e-06	56.7237	47.035	132.643	47457248	0.193274	0.545051	195009	0.0452085	0.127492	45614.3	7.3328e-14	2.06791e-13	7.39863e-08	47.4588	10.2742	28.974	10366389	0.0703645	0.198434	70996.1	1.68315e-11	4.74662e-11	1.69825e-05
GUINEA	324	Western Africa	40924.4	35976.8	396.643	7.95578	9.04988	325586	0.0815517	0.092767	3337.46	9.41497e-13	1.07097e-12	3.85302e-08	349.894	7.62517	8.67381	312056	0.0165264	0.0187992	676.334	0.0690889	0.0785902	2827.42	2.42823e-13	2.76217e-13	9.9374e-09	1474.88	0.330604	0.376069	13529.8	0.0124629	0.0141768	510.035	1.64017e-12	1.86573e-12	6.7123e-08
INDIA	356	Southern Asia	4.22042e+06	7.00047e+06	17.47	180.629	108.897	762332800	0.137368	0.0828161	579752	3.63967e-13	2.19427e-13	1.53609e-06	18.0499	147.812	89.1126	623829824	0.0713677	0.043026	301202	0.127094	0.0766222	536391	5.14566e-13	3.1022e-13	2.17169e-06	14.858	32.8173	19.7848	138502944	0.0102739	0.00619391	43360.3	2.13368e-13	1.28635e-13	9.00503e-07
INDONESIA	360	South-eastern Asia	25470.4	21143.3	25.4556	123.965	149.336	3.15744e+06	1.15264	1.38854	29358.3	1.17593e-12	1.41659e-12	2.99514e-08	22.941	116.298	140.1	2962171	0.0583858	0.070335	1487.11	1.14703	1.38178	29215.3	1.19306e-12	1.43723e-12	3.03877e-08	63.5999	7.66668	9.23574	195274	0.00561113	0.0067595	142.918	1.1588e-12	1.39596e-12	2.95152e-08
IRAN	364	Southern Asia	375184	193167	40.605	77.7147	150.943	29157314	0.0244312	0.0474523	9166.22	3.6938e-13	7.17439e-13	1.38586e-07	41.7341	63.9285	124.167	23984976	0.0279212	0.0542307	10475.6	0.017113	0.0332383	6420.54	1.46733e-14	2.84995e-14	5.50517e-09	35.3689	13.7861	26.7765	5.17234e+06	0.00731822	0.014214	2745.68	7.24087e-13	1.40638e-12	2.71666e-07
ISRAEL	376	Western Asia	40760.3	10939.4	33.7869	93.3971	347.997	3.80689e+06	0.0374836	0.139664	1527.84	1.97778e-11	7.36922e-11	8.0615e-07	34.7205	76.8423	286.314	3132116	0.00678416	0.0252778	276.524	0.0304652	0.113513	1241.77	5.20875e-14	1.94078e-13	2.1231e-09	29.4537	16.5548	61.6831	674778	0.00701841	0.0261506	286.073	3.95036e-11	1.4719e-10	1.61018e-06
COTE D'IVOIRE	384	Western Africa	325320	289718	131.461	24.0041	26.9538	7808995	0.0376292	0.0422532	12241.5	1.22214e-13	1.37232e-13	3.97586e-08	128.318	20.7921	23.3471	6.76408e+06	0.0123479	0.0138653	4017.02	0.0278214	0.0312402	9050.85	5.06612e-14	5.68866e-14	1.64811e-08	151.807	3.21197	3.60667	1.04492e+06	0.0098078	0.011013	3190.67	1.93767e-13	2.17577e-13	6.3036e-08
KAZAKHSTAN	398	Central Asia	251107	142117	467.523	6.74961	11.9259	1.69487e+06	0.0225955	0.0399241	5673.87	3.67636e-14	6.49579e-14	9.2316e-09	441.806	6.03885	10.6701	1.5164e+06	0.0442061	0.078108	11100.4	0.0107762	0.0190405	2705.96	7.22329e-14	1.27629e-13	1.81382e-08	686.031	0.710755	1.25584	178475	0.0118193	0.0208836	2967.91	1.29438e-15	2.28706e-15	3.25029e-10
KENYA	404	Eastern Africa	21359	42346.1	78.4348	40.2321	20.2928	859320	0.047839	0.0241296	1021.8	2.54924e-13	1.28582e-13	5.44493e-09	73.5251	36.2869	18.3028	775054	0.0528165	0.0266402	1128.11	0.0132256	0.00667089	282.486	1.50051e-13	7.56847e-14	3.20496e-09	123.594	3.94518	1.98992	84265.4	0.0346134	0.0174587	739.309	3.59797e-13	1.81479e-13	7.68491e-09
N. KOREA	408	Eastern Asia	24425.3	18809.9	91.8836	34.3435	44.5962	838850	0.593105	0.770168	14486.8	9.28804e-12	1.20608e-11	2.26863e-07	87.8588	30.3669	39.4325	741722	0.471721	0.612546	11521.9	0.43292	0.562162	10574.2	1.85238e-11	2.40538e-11	4.5245e-07	122.619	3.97655	5.16368	97128.4	0.160185	0.208006	3912.57	5.22803e-14	6.78878e-14	1.27696e-09
KYRGYZSTAN	417	Central Asia	72815.9	30917.1	522.752	6.03652	14.2172	439555	0.274931	0.647518	20019.4	7.98874e-15	1.88151e-14	5.81708e-10	463.241	5.75943	13.5646	419378	0.909477	2.142	66224.4	0	0	0	0	0	0	1759.7	0.277092	0.652608	20176.7	0.274931	0.647518	20019.4	1.59775e-14	3.76302e-14	1.16342e-09
LAO PEOPLEâ€™S DEMOCRATIC REPUBLIC	418	South-eastern Asia	11420.7	4464.52	445.31	7.08629	18.1274	80930.2	0.219302	0.560995	2504.58	7.1475e-13	1.8284e-12	8.16293e-09	433.853	6.14955	15.7311	70232	0.0452261	0.115693	516.513	0.201637	0.515806	2302.83	1.30038e-12	3.32649e-12	1.48512e-08	520.528	0.936741	2.39627	10698.2	0.0176652	0.0451893	201.749	1.29122e-13	3.30307e-13	1.47467e-09
MADAGASCAR	450	Eastern Africa	22858.8	20037.5	531.917	5.9325	6.7678	135610	0.137571	0.156941	3144.71	8.054e-14	9.188e-14	1.84105e-09	478.076	5.5807	6.36646	127568	0.00737574	0.00841424	168.6	0.134098	0.152979	3065.32	1.30889e-13	1.49319e-13	2.99197e-09	1385.99	0.351806	0.40134	8041.84	0.0034734	0.00396246	79.3978	3.01906e-14	3.44414e-14	6.9012e-10
MALAWI	454	Eastern Africa	28773	34407.4	57.2923	55.0789	46.0594	1.58479e+06	0.0606173	0.0506909	1744.14	3.52537e-13	2.94807e-13	1.01436e-08	56.1481	47.5172	39.736	1.36721e+06	0.00992711	0.00830149	285.633	0.0382	0.0319445	1099.13	3.74572e-13	3.13234e-13	1.07776e-08	64.4824	7.56175	6.32347	217574	0.0224173	0.0187464	645.015	3.30502e-13	2.7638e-13	9.50953e-09
MALI	466	Western Africa	177869	193889	116.55	27.075	24.8379	4.81581e+06	0.004066	0.00373004	723.215	7.46923e-15	6.85208e-15	1.32855e-09	117.962	22.6174	20.7486	4022931	0.00356634	0.00327166	634.341	0.000247669	0.000227205	44.0527	2.69904e-15	2.47603e-15	4.80076e-10	109.385	4.45763	4.08932	792875	0.00381833	0.00350283	679.162	1.22394e-14	1.12281e-14	2.17702e-09
MEXICO	484	Central America	290265	112059	50.0858	63.0039	163.198	18287854	0.0155175	0.0401947	4504.18	1.20504e-13	3.12141e-13	3.49782e-08	46.8367	56.9639	147.553	16534642	0.00533465	0.0138183	1548.47	0.0141989	0.0367793	4121.45	1.76781e-13	4.57913e-13	5.13134e-08	80.7281	6.04003	15.6454	1.75321e+06	0.00131854	0.00341539	382.725	6.42277e-14	1.66368e-13	1.86431e-08
MOZAMBIQUE	508	Eastern Africa	44093.9	107686	157.507	20.0346	8.20355	883406	0.0941942	0.0385696	4153.4	1.14238e-13	4.67767e-14	5.03719e-09	137.964	19.3384	7.91845	852705	0.010085	0.00412947	444.685	0.0884301	0.0362093	3899.23	1.74108e-13	7.12916e-14	7.67709e-09	700.294	0.696279	0.285104	30701.7	0.00576411	0.00236022	254.162	5.43678e-14	2.22619e-14	2.39729e-09
NIGER	562	Western Africa	7123.12	2971.2	729.016	4.32858	10.3773	30833	9.21772e-05	0.000220984	0.656589	1.15419e-17	2.76705e-17	8.22146e-14	670.625	3.97838	9.53771	28338.5	4.10847e-05	9.8496e-05	0.292652	9.58245e-06	2.29728e-05	0.0682569	2.28268e-17	5.47247e-17	1.62598e-13	1392.35	0.350199	0.839562	2494.51	8.25947e-05	0.000198012	0.588332	2.57026e-19	6.16191e-19	1.83083e-15
NIGERIA	566	Western Africa	306029	459378	31.3551	100.641	67.045	30798988	0.183978	0.122563	56302.7	1.9818e-13	1.32024e-13	6.06489e-08	28.8382	92.5163	61.6326	28312660	0.0407526	0.0271486	12471.5	0.174689	0.116374	53459.8	3.86502e-13	2.5748e-13	1.18281e-07	60.0161	8.12449	5.41238	2486328	0.00928978	0.00618867	2842.94	9.85886e-15	6.56778e-15	3.0171e-09
PAKISTAN	586	Southern Asia	4671074	2.91698e+06	20.0498	157.388	252.032	735172800	0.00769023	0.0123147	35921.6	1.71157e-14	2.7408e-14	7.99487e-08	19.077	139.854	223.954	653268992	0.0459979	0.0736581	214859	0.00461898	0.00739656	21575.6	1.94614e-14	3.11643e-14	9.09056e-08	27.8084	17.5343	28.0783	81903824	0.00307124	0.0049181	14346	1.477e-14	2.36518e-14	6.89919e-08
PARAGUAY	600	South America	178211	181491	113.242	27.8659	27.3623	4.966e+06	0.0391797	0.0384716	6982.24	1.86641e-13	1.83268e-13	3.32614e-08	115.501	23.0993	22.6818	4116542	0.0252417	0.0247855	4498.33	0.0229318	0.0225173	4086.68	3.66953e-13	3.60321e-13	6.53949e-08	102.296	4.76658	4.68043	849454	0.016248	0.0159543	2895.56	6.3284e-15	6.21402e-15	1.12779e-09
PERU	604	South America	119259	76186.5	44.2517	71.3102	111.626	8504394	0.817798	1.28015	97529.9	7.82372e-13	1.22469e-12	9.33049e-08	42.5698	62.6736	98.1066	7474396	0.369843	0.578937	44107.1	0.719229	1.12585	85774.6	8.81343e-13	1.37962e-12	1.05108e-07	56.4571	8.63664	13.5194	1.03e+06	0.098569	0.154296	11755.3	6.834e-13	1.06977e-12	8.15017e-08
SENEGAL	686	Western Africa	21590	27540.2	47.3535	66.6392	52.2416	1.43874e+06	0.0257758	0.0202068	556.5	2.35235e-12	1.84412e-12	5.07873e-08	48.2776	55.2637	43.3238	1.19314e+06	0.00512152	0.00401499	110.574	0.0235114	0.0184317	507.612	4.70425e-12	3.68787e-12	1.01565e-07	42.864	11.3755	8.91778	245597	0.00226437	0.00177515	48.8879	4.56218e-16	3.5765e-16	9.84974e-12
VIET NAM	704	South-eastern Asia	19535.1	22600.4	12.9758	243.192	210.207	4.75078e+06	3.32677	2.87555	64988.8	8.84586e-12	7.64607e-12	1.72805e-07	11.951	223.244	192.965	4.36109e+06	0.327566	0.283137	6399.02	3.30057	2.85291	64476.9	1.72876e-11	1.49428e-11	3.37715e-07	24.4435	19.948	17.2424	389686	0.0262017	0.0226479	511.852	4.04119e-13	3.49307e-13	7.89449e-09
SOUTH AFRICA	710	Southern Africa	78873.5	60914.2	127.738	24.7037	31.9871	1.94847e+06	0.0325214	0.0421097	2565.08	5.27731e-14	6.83321e-14	4.1624e-09	130.401	20.4599	26.4921	1.61375e+06	0.0158736	0.0205536	1252.01	0.0218188	0.0282517	1720.93	7.88194e-14	1.02058e-13	6.21676e-09	114.897	4.2438	5.495	334723	0.0107026	0.013858	844.152	2.67268e-14	3.46066e-14	2.10803e-09
ZIMBABWE	716	Eastern Africa	180764	242055	71.7085	44.0059	32.8631	7954681	0.103427	0.0772381	18695.9	2.85588e-13	2.13274e-13	5.16241e-08	71.4729	37.3288	27.8767	6747704	0.113332	0.0846345	20486.2	0.0421101	0.0314473	7611.99	1.72121e-13	1.28538e-13	3.11133e-08	73.0258	6.67709	4.98637	1206977	0.0613171	0.0457908	11083.9	3.99056e-13	2.98009e-13	7.21348e-08
SPAIN	724	Southern Europe	301535	97552.6	143.886	21.9312	67.7892	6.61301e+06	0.0297508	0.0919597	8970.91	4.89881e-13	1.51422e-12	1.47716e-07	149.165	17.8862	55.2862	5.39332e+06	0.0555977	0.171852	16764.6	0.00530736	0.016405	1600.35	8.95455e-13	2.76785e-12	2.70011e-07	120.545	4.04497	12.503	1219697	0.0244435	0.0755547	7370.55	8.43067e-14	2.60592e-13	2.54214e-08
SUDAN	736	Northern Africa	183497	170500	189.343	16.6661	17.9364	3058168	0.00218994	0.00235687	401.847	2.39279e-16	2.57517e-16	4.39068e-11	166.611	16.0133	17.2339	2938395	0.00547691	0.00589438	1004.99	0.000153062	0.000164729	28.0864	3.42858e-16	3.68992e-16	6.29133e-11	747.021	0.652726	0.702479	119773	0.00203688	0.00219214	373.76	1.357e-16	1.46043e-16	2.49004e-11
SWAZILAND	748	Southern Africa	13626.2	25536.9	36.4517	86.5693	46.1925	1.17961e+06	0.356196	0.190063	4853.62	1.93986e-13	1.03509e-13	2.6433e-09	38.7141	68.9155	36.7726	939058	0.0336731	0.0179677	458.838	0.340534	0.181706	4640.19	2.92179e-13	1.55904e-13	3.9813e-09	27.6201	17.6538	9.41991	240555	0.0156625	0.00835738	213.421	9.57925e-14	5.1114e-14	1.30529e-09
SYRIA	760	Western Asia	845577	234093	105.431	29.9305	108.114	25308596	0.00623872	0.0225352	5275.32	6.81099e-14	2.46023e-13	5.75922e-08	108.36	24.6216	88.9369	20819476	0.00430144	0.0155374	3637.2	0.00413141	0.0149233	3493.43	4.44035e-14	1.60392e-13	3.75466e-08	91.8451	5.30894	19.1767	4489121	0.00210731	0.00761192	1781.89	9.18162e-14	3.31654e-13	7.76377e-08
TAJIKISTAN	762	Central Asia	378985	254284	141.907	22.237	33.1421	8427502	0.491613	0.7327	186314	2.26931e-13	3.38218e-13	8.60035e-08	140.041	19.0515	28.3944	7220247	1.7691	2.63667	670462	0.00030596	0.000456003	115.954	8.72349e-16	1.30015e-15	3.30607e-10	153.069	3.1855	4.74766	1.20725e+06	0.491307	0.732244	186198	4.5299e-13	6.75136e-13	1.71676e-07
THAILAND	764	South-eastern Asia	32149.7	24873.5	22.8418	138.15	178.563	4441483	0.458764	0.592966	14749.1	1.72941e-12	2.23531e-12	5.56e-08	21.3527	124.949	161.5	4.01707e+06	0.256988	0.332164	8262.09	0.44027	0.569061	14154.5	2.79537e-12	3.61309e-12	8.98702e-08	36.936	13.2012	17.063	424416	0.0184946	0.0239048	594.596	6.63452e-13	8.57531e-13	2.13298e-08
TOGO	768	Western Africa	145022	169764	58.6655	53.7897	45.95	7800660	0.0286702	0.0244916	4157.8	6.57202e-13	5.61417e-13	9.53085e-08	61.7466	43.2089	36.9113	6266214	0.0220647	0.0188488	3199.86	0.012417	0.0106073	1800.74	6.71531e-14	5.73657e-14	9.73864e-09	46.0834	10.5808	9.03869	1.53445e+06	0.0162532	0.0138843	2357.06	1.24725e-12	1.06547e-12	1.80878e-07
TURKEY	792	Western Asia	1.95951e+06	654332	44.2025	71.3896	213.788	139888256	0.110006	0.329432	215558	6.39083e-13	1.91384e-12	1.25229e-06	42.7447	62.417	186.918	122306544	0.520671	1.55924	1.02026e+06	0.0291962	0.087433	57210.2	4.63494e-14	1.38801e-13	9.08219e-08	54.3437	8.97253	26.8697	17581720	0.08081	0.241999	158348	1.23182e-12	3.68888e-12	2.41375e-06
TURKMENISTAN	795	Central Asia	839347	584409	76.264	41.3774	59.4275	34729968	0.000383611	0.000550954	321.983	1.49538e-16	2.14772e-16	1.25515e-10	66.8582	39.9054	57.3134	33494452	0.00122587	0.00176063	1028.93	0	0	0	0	0	0	331.25	1.472	2.11413	1235518	0.000383611	0.000550954	321.983	2.99077e-16	4.29544e-16	2.51029e-10
UGANDA	800	Eastern Africa	52394.5	219313	16.6517	189.506	45.2735	9929094	0.0898202	0.0214583	4706.08	7.61096e-15	1.81828e-15	3.98773e-10	17.195	155.162	37.0685	8.12962e+06	0.137749	0.0329085	7217.28	0.00078818	0.000188298	41.2963	1.68347e-15	4.02186e-16	8.82048e-11	14.1972	34.3448	8.20505	1.79948e+06	0.089032	0.02127	4664.79	1.35385e-14	3.23437e-15	7.09341e-10
EGYPT	818	Northern Africa	625684	281029	49.4568	63.8052	142.056	39921900	0.00139465	0.00310504	872.607	1.57505e-14	3.50669e-14	9.85482e-09	49.915	53.4509	119.003	33443352	0.000609053	0.001356	381.075	0.000907217	0.00201983	567.631	2.38428e-14	5.30836e-14	1.49181e-08	47.0913	10.3543	23.0529	6.47855e+06	0.000487429	0.00108521	304.976	7.65816e-15	1.70501e-14	4.79159e-09
TANZANIA	834	Eastern Africa	123481	284561	76.948	41.0095	17.7954	5.06388e+06	0.0768076	0.0333295	9484.26	9.91873e-13	4.30408e-13	1.22477e-07	75.1231	35.515	15.4112	4385422	0.0254012	0.0110225	3136.56	0.0328102	0.0142375	4051.43	5.7817e-13	2.50888e-13	7.13928e-08	88.7437	5.49447	2.38424	678462	0.0439974	0.019092	5432.84	1.40558e-12	6.09928e-13	1.73562e-07
USA	840	Northern America	8880392	5.13505e+06	35.1933	89.6649	155.064	796259200	0.154182	0.266637	1.36919e+06	6.6478e-13	1.14965e-12	5.9035e-06	34.4218	77.5091	134.042	688311296	0.0778895	0.1347	691690	0.151202	0.261483	1.34273e+06	1.16614e-12	2.01669e-12	1.03558e-05	40.1127	12.1558	21.0218	107947904	0.00298006	0.00515363	26464.1	1.63416e-13	2.82607e-13	1.4512e-06
BURKINA FASO	854	Western Africa	171123	168661	70.6756	44.649	45.3008	7.64049e+06	0.00216541	0.00219702	370.552	2.0957e-16	2.12628e-16	3.58622e-11	74.3002	35.9084	36.4325	6144756	0.00208392	0.00211433	356.606	0.000122193	0.000123977	20.9101	2.60444e-16	2.64245e-16	4.4568e-11	55.7852	8.74067	8.86825	1.49573e+06	0.00204322	0.00207304	349.642	1.58695e-16	1.61012e-16	2.71564e-11
UZBEKISTAN	860	Central Asia	2.97856e+06	1471824	38.8945	81.1324	164.189	241657920	0.0215574	0.0436261	64210	2.46734e-15	4.99321e-15	7.34913e-09	35.8876	74.3432	150.45	221436032	0.195225	0.395082	581491	0	0	0	0	0	0	71.8206	6.78914	13.7393	20221880	0.0215574	0.0436261	64210	4.93468e-15	9.98642e-15	1.46983e-08
VENEZUELA (BOLIVARIAN REPUBLIC OF)	862	South America	25616.7	24003.7	40.0423	78.8067	84.1025	2018768	0.143925	0.153597	3686.88	1.90947e-12	2.03779e-12	4.89143e-08	38.5833	69.1492	73.796	1.77137e+06	0.130483	0.139252	3342.55	0.124694	0.133073	3194.24	5.41585e-13	5.77979e-13	1.38736e-08	50.489	9.65755	10.3065	247394	0.0192311	0.0205235	492.638	3.27736e-12	3.49759e-12	8.39551e-08
YEMEN	887	Western Asia	23759.1	25318.8	64.4861	48.9346	45.9202	1.16264e+06	0.329577	0.309275	7830.47	9.84014e-13	9.23399e-13	2.33793e-08	60.9633	43.764	41.0681	1039794	0.00662853	0.00622021	157.488	0.323556	0.303625	7687.4	1.95829e-12	1.83766e-12	4.65273e-08	94.3026	5.17059	4.85208	122849	0.0060217	0.00565076	143.07	9.7362e-15	9.13645e-15	2.31324e-10
ZAMBIA	894	Eastern Africa	59089.7	53343.2	165.083	19.1153	21.1745	1.12952e+06	0.0351078	0.0388899	2074.51	5.87566e-14	6.50862e-14	3.47191e-09	163.781	16.29	18.0449	962572	0.0775451	0.0858987	4582.11	0.00788372	0.008733	465.846	5.79537e-14	6.41968e-14	3.42446e-09	172.586	2.82525	3.1296	166943	0.0272241	0.0301569	1608.67	5.95594e-14	6.59755e-14	3.51935e-09

## Sheet: Groundnut_Country_Level
Country	Country	Sub Region	Dry Production	Crop Area	Nutrient Use Efficiency	Fertiliser Input N&P			Nutrient Loading (N&P) to Aquatic Receptors			Aquatic Species Richness Impact Freshwater and Marine Combined			Nutrient Use Efficiency	N Input			N Load Freshwater			N Load Marine			N Marine Demersal Species Richness impact			Nutrient Use Efficiency	P Input			P Load Freshwater			P Freshwater Fish Species Richness impact
Name	Code		per country	per country		Per Tonne Crop	Per Hectare	Total	Per Tonne Crop	Per Hectare	Total	Per Tonne Crop	Per Hectare	Total	Nitrogen	Per Tonne Crop	Per Hectare	Total	Per Tonne Crop	Per Hectare	Total	Per Tonne Crop	Per Hectare	Total	Per Tonne Crop	Per Hectare	Total	Phopshours	Per Tonne Crop	Per Hectare	Total	Per Tonne Crop	Per Hectare	Total	Per Tonne Crop	Per Hectare	Total
			Tonne	ha	%	kg/tonne crop	kg/ha	kg	kg/tonne crop	kg/ha	kg	PDF.yr/tonne crop	PDF.yr/ha	PDF.yr	%	kg/tonne crop	kg/ha	kg	kg/tonne crop	kg/ha	kg	kg/tonne crop	kg/ha	kg	PDF.yr/tonne crop	PDF.yr/ha	PDF.yr	%	kg/tonne crop	kg/ha	kg	kg/tonne crop	kg/ha	kg	PDF.yr/tonne crop	PDF.yr/ha	PDF.yr
ALGERIA	12	Northern Africa	3307.37	3154.85	71.365	80.7824	84.6876	267177	0.0680005	0.0712878	224.903	8.21671e-15	8.61393e-15	2.71757e-11	82.4398	65.1312	68.2798	215413	0.0544656	0.0570986	180.138	0.0108971	0.0114239	36.0407	1.20426e-14	1.26248e-14	3.98294e-11	25.2785	15.6512	16.4078	51764.4	0.0571034	0.0598639	188.862	4.3908e-15	4.60306e-15	1.4522e-11
ANGOLA	24	Middle Africa	26320.8	66929.3	232.117	24.8368	9.76738	653724	0.0916607	0.0360467	2412.58	3.5108e-13	1.38066e-13	9.24069e-09	222.096	24.1761	9.50753	636332	0.0230984	0.00908372	607.967	0.0814205	0.0320196	2143.05	6.60627e-13	2.598e-13	1.73882e-08	598.778	0.660746	0.259846	17391.3	0.0102402	0.0040271	269.531	4.15323e-14	1.63331e-14	1.09316e-09
ARGENTINA	32	South America	514764	265440	243.319	23.6933	45.9481	12196467	0.0123191	0.0238903	6341.43	4.91656e-14	9.53462e-14	2.53087e-08	264.184	20.3245	39.415	10462305	0.00212418	0.00411939	1093.45	0.011772	0.0228293	6059.81	9.54727e-14	1.85149e-13	4.91459e-08	117.441	3.36885	6.53316	1734162	0.000547084	0.00106095	281.619	2.85859e-15	5.54363e-15	1.4715e-09
AUSTRALIA	36	Australia and New Zealand	35944.6	22061.4	56.7147	101.65	165.618	3653762	0.0108311	0.0176471	389.321	6.14352e-14	1.00096e-13	2.20826e-09	68.8449	77.9927	127.073	2.80341e+06	0.00372019	0.00606128	133.721	0.00708333	0.0115408	254.607	1.01252e-13	1.6497e-13	3.63948e-09	16.7239	23.6572	38.5445	850348	0.0037478	0.00610628	134.713	2.16179e-14	3.52219e-14	7.77046e-10
BANGLADESH	50	Southern Asia	31568	28640.3	71.3604	80.7876	89.046	2.5503e+06	0.0513628	0.0566133	1621.42	7.68008e-13	8.46516e-13	2.42445e-08	76.9573	69.7711	76.9034	2.20254e+06	0.00817011	0.00900528	257.914	0.0484983	0.053456	1531	1.3731e-12	1.51347e-12	4.33461e-08	35.9134	11.0165	12.1427	347769	0.0028645	0.00315732	90.4266	1.62912e-13	1.79565e-13	5.1428e-09
BOLIVIA	68	South America	13084.4	11583.8	651.705	8.84609	9.99203	115746	0.0781537	0.0882779	1022.59	1.40752e-13	1.58985e-13	1.84165e-09	668.923	8.02693	9.06676	105027	0.0728587	0.082297	953.311	0.0558055	0.0630347	730.181	2.33752e-13	2.64033e-13	3.0585e-09	482.981	0.819162	0.925278	10718.2	0.0223482	0.0252432	292.412	4.77515e-14	5.39373e-14	6.24798e-10
BRAZIL	76	South America	170359	96540.2	139.803	41.2369	72.7686	7025087	0.0216243	0.0381593	3683.91	1.08664e-13	1.91754e-13	1.8512e-08	194.149	27.6561	48.8033	4711482	0.0214144	0.0377889	3648.15	0.00855389	0.0150946	1457.23	1.04941e-13	1.85184e-13	1.78776e-08	29.1325	13.5807	23.9652	2.31361e+06	0.0130704	0.0230647	2226.67	1.12388e-13	1.98325e-13	1.91464e-08
BULGARIA	100	Eastern Europe	7764.02	10302.6	383.085	15.049	11.3409	116840	0.161696	0.121854	1255.41	8.26168e-13	6.22601e-13	6.41439e-09	356.88	15.0454	11.3382	116813	0.140009	0.105511	1087.03	0.109124	0.0822362	847.244	1.58373e-12	1.1935e-12	1.22961e-08	110800	0.00357077	0.00269093	27.7235	0.0525713	0.0396177	408.164	6.86111e-14	5.17054e-14	5.32698e-10
MYANMAR	104	South-eastern Asia	637807	538404	144.655	39.8537	47.2116	25418946	0.177765	0.210585	113380	1.849e-12	2.19038e-12	1.17931e-06	169.635	31.6527	37.4966	20188348	0.0322157	0.0381635	20547.4	0.164588	0.194975	104975	7.89114e-13	9.34804e-13	5.03302e-07	48.2434	8.20091	9.715	5.2306e+06	0.0131776	0.0156105	8404.75	2.90889e-12	3.44595e-12	1.85531e-06
BURUNDI	108	Eastern Africa	7611.12	11613.2	216.236	26.6609	17.4731	202919	0.111112	0.0728213	845.69	2.04329e-13	1.33914e-13	1.55517e-09	233.719	22.9737	15.0566	174856	0.0541269	0.035474	411.967	0	0	0	0	0	0	107.301	3.6872	2.41654	28063.8	0.111112	0.0728213	845.69	4.08657e-13	2.67828e-13	3.11034e-09
CAMBODIA	116	South-eastern Asia	7500.79	10088.3	160.555	35.907	26.6973	269331	0.0836882	0.0622232	627.728	4.74892e-12	3.53088e-12	3.56207e-08	180.934	29.676	22.0645	222593	0.00819721	0.00609473	61.4856	0.0772681	0.0574498	579.572	9.48179e-12	7.04983e-12	7.11209e-08	63.4949	6.23105	4.63286	46737.8	0.00642013	0.00477345	48.1561	1.60589e-14	1.194e-14	1.20454e-10
CAMEROON	120	Middle Africa	164432	229282	61.7835	93.3104	66.9186	15343246	0.145524	0.104364	23928.8	3.19876e-13	2.29403e-13	5.2598e-08	71.6968	74.8904	53.7084	12314396	0.023265	0.0166847	3825.52	0.135391	0.0970974	22262.7	6.04271e-13	4.3336e-13	9.93617e-08	21.4788	18.42	13.2101	3.02885e+06	0.0101323	0.00726649	1666.08	3.54814e-14	2.54458e-14	5.83428e-09
CENTRAL AFRICAN REPUBLIC	140	Middle Africa	104973	104377	54.1524	106.46	107.067	11175377	0.060865	0.0612125	6389.18	7.24944e-14	7.29084e-14	7.60995e-09	63.3739	84.7257	85.2095	8893908	0.0269787	0.0271327	2832.03	0.050596	0.0508849	5311.22	1.42987e-13	1.43804e-13	1.50098e-08	18.2038	21.7339	21.858	2.28147e+06	0.010269	0.0103276	1077.96	2.00167e-15	2.0131e-15	2.10121e-10
SRI LANKA	144	Southern Asia	6841.8	9908.61	66.0366	87.3007	60.2803	597293	0.249011	0.17194	1703.68	3.61515e-11	2.49622e-11	2.47341e-07	79.7241	67.3498	46.5044	460794	0.173395	0.119728	1186.34	0.136989	0.0945898	937.253	1.41412e-13	9.76436e-14	9.67512e-10	19.8307	19.9509	13.7759	136500	0.112022	0.0773499	766.43	7.21615e-11	4.98268e-11	4.93714e-07
CHAD	148	Middle Africa	184939	226457	301.395	19.1279	15.6211	3.5375e+06	0.0060935	0.00497635	1126.93	3.40722e-15	2.78256e-15	6.30129e-10	317.328	16.9206	13.8185	3129293	0.00534039	0.00436131	987.647	0.00286557	0.00234021	529.956	6.7477e-15	5.51061e-15	1.24792e-09	179.247	2.20723	1.80257	408203	0.00322793	0.00263614	596.971	6.67371e-17	5.45018e-17	1.23423e-11
CHINA	156	Eastern Asia	12001306	4.45496e+06	74.1451	77.7535	209.462	933143744	0.108057	0.291096	1.29682e+06	1.41594e-12	3.81443e-12	1.69931e-05	88.0031	61.0138	164.366	732245184	0.0804703	0.216781	965749	0.0841058	0.226574	1.00938e+06	2.3553e-12	6.34498e-12	2.82666e-05	23.6348	16.7397	45.0955	200898576	0.0239507	0.0645214	287440	4.76583e-13	1.28388e-12	5.71961e-06
TAIWAN	158		69753.5	27518.7	130.481	44.1831	111.994	3.08193e+06	0.380607	0.964752	26548.7	2.13031e-11	5.39984e-11	1.48596e-06	168.026	31.9557	81.0003	2229020	0.0772387	0.195782	5387.67	0.352401	0.893255	24581.2	1.52659e-12	3.86955e-12	1.06485e-07	32.3568	12.2274	30.9937	852906	0.0282066	0.0714973	1967.51	4.10796e-11	1.04127e-10	2.86544e-06
COLOMBIA	170	South America	3459.28	2464.61	291.153	19.8007	27.7919	68496.3	0.324497	0.455458	1122.53	1.00791e-12	1.41468e-12	3.48663e-09	316.461	16.967	23.8146	58693.8	0.103027	0.144607	356.401	0.27723	0.389115	959.018	7.57404e-13	1.06308e-12	2.62007e-09	139.62	2.83368	3.9773	9802.51	0.0472671	0.0663432	163.51	1.25841e-12	1.76628e-12	4.35319e-09
CONGO	178	Middle Africa	16418.6	24679.7	183.522	31.4133	20.8982	515762	0.288427	0.191881	4735.56	6.76011e-13	4.49728e-13	1.10991e-08	197.858	27.1377	18.0538	445562	0.0199297	0.0132586	327.218	0.283332	0.188492	4651.92	1.06858e-12	7.1089e-13	1.75446e-08	92.5341	4.27562	2.84443	70199.6	0.00509465	0.00338931	83.647	2.83443e-13	1.88565e-13	4.65374e-09
CONGO D.C	180	Middle Africa	349145	480350	296.732	19.4285	14.1217	6783350	0.103402	0.0751587	36102.5	2.135e-13	1.55184e-13	7.45424e-08	306.899	17.4957	12.7168	6108524	0.032021	0.0232747	11180	0.0823966	0.0598905	28768.4	3.11402e-13	2.26344e-13	1.08724e-07	204.698	1.9328	1.40487	674826	0.0210058	0.0152682	7334.08	1.15598e-13	8.40232e-14	4.03605e-08
CUBA	192	Caribbean	10650	11305.7	486.251	11.8561	11.1684	126267	0.0340373	0.0320631	362.495	2.56878e-13	2.4198e-13	2.73574e-09	576.82	9.30863	8.76873	99136.5	0.0015467	0.00145699	16.4723	0.0316409	0.0298058	336.975	5.06102e-14	4.76749e-14	5.38997e-10	155.307	2.54747	2.39972	27130.5	0.00239633	0.00225734	25.5208	4.63147e-13	4.36284e-13	4.93249e-09
BENIN	204	Western Africa	82874.4	103926	121.51	47.4449	37.8341	3.93197e+06	0.084456	0.0673481	6999.25	1.03244e-13	8.23306e-14	8.55632e-09	138.173	38.8601	30.9884	3.22051e+06	0.00654161	0.0052165	542.132	0.0790699	0.063053	6552.87	1.98416e-13	1.58223e-13	1.64436e-08	46.0864	8.58475	6.84577	711456	0.00538612	0.00429508	446.372	8.07319e-15	6.43784e-15	6.69061e-10
DOMINICAN REPUBLIC	214	Caribbean	3007.49	2825.37	168.675	34.1785	36.3816	102792	0.149715	0.159365	450.266	4.26951e-12	4.54472e-12	1.28405e-08	181.891	29.5198	31.4227	88780.7	0.150281	0.159968	451.968	0.0662595	0.0705307	199.275	7.21384e-14	7.67885e-14	2.16956e-10	84.9257	4.65866	4.95896	14010.9	0.0834552	0.0888347	250.991	8.46688e-12	9.01265e-12	2.54641e-08
ECUADOR	218	South America	8345.72	11656.3	98.4985	58.5292	41.9058	488468	0.773324	0.553686	6453.95	7.007e-13	5.01688e-13	5.84784e-09	105.053	51.1114	36.5948	426561	0.198906	0.142413	1660.02	0.675861	0.483904	5640.55	8.37675e-13	5.9976e-13	6.991e-09	53.3364	7.41782	5.31102	61907.1	0.0974627	0.0697815	813.397	5.63724e-13	4.03616e-13	4.70468e-09
ETHIOPIA	231	Eastern Africa	8824.2	13006.9	451.851	12.7587	8.65584	112586	0.144953	0.0983399	1279.1	2.46016e-13	1.66904e-13	2.1709e-09	456.303	11.7672	7.98316	103836	0.106394	0.0721801	938.838	0.0283822	0.0192552	250.45	1.81055e-13	1.22832e-13	1.59767e-09	399.016	0.991538	0.672685	8749.53	0.116571	0.0790847	1028.65	3.10978e-13	2.10975e-13	2.74413e-09
GABON	266	Middle Africa	16522.8	17207	266.466	21.6352	20.7749	357474	0.123243	0.118343	2036.32	3.44518e-13	3.3082e-13	5.69241e-09	286.116	18.7665	18.0203	310075	0.00947056	0.009094	156.48	0.115593	0.110996	1909.91	2.28537e-13	2.1945e-13	3.77607e-09	137.916	2.8687	2.75464	47399.1	0.00765066	0.00734646	126.41	4.60499e-13	4.42189e-13	7.60874e-09
GAMBIA	270	Western Africa	82997.9	86221.8	142.719	40.3943	38.884	3.35264e+06	0.0410279	0.0394939	3405.23	9.21708e-13	8.87245e-13	7.64998e-08	161.83	33.1793	31.9387	2753814	0.00404682	0.0038955	335.877	0.0391766	0.0377118	3251.58	1.84266e-12	1.77377e-12	1.52937e-07	54.8357	7.21501	6.94524	598830	0.00185133	0.00178211	153.657	7.5267e-16	7.24527e-16	6.247e-11
PALESTINE, STATE OF	275	Western Asia	3560.75	782.605	208.202	27.6896	125.984	98595.8	0.00781127	0.0355402	27.8139	2.48023e-14	1.12847e-13	8.83145e-11	278.226	19.2987	87.8064	68717.8	0.00115983	0.00527705	4.12985	0.00727867	0.0331169	25.9175	1.68441e-15	7.66385e-15	5.99777e-12	47.1509	8.39094	38.1776	29878	0.0005326	0.00242326	1.89645	4.79201e-14	2.1803e-13	1.70631e-10
GHANA	288	Western Africa	214265	220016	272.973	21.1195	20.5673	4.52515e+06	0.013232	0.0128861	2835.14	9.47804e-15	9.23026e-15	2.03081e-09	295.204	18.1888	17.7133	3897213	0.0232256	0.0226184	4976.43	0.0012463	0.00121372	267.038	8.97364e-15	8.73905e-15	1.92273e-09	135	2.93067	2.85405	627938	0.0119857	0.0116723	2568.11	9.98244e-15	9.72148e-15	2.13888e-09
GUINEA	324	Western Africa	172100	164819	245.651	23.4684	24.505	4.0389e+06	0.156786	0.163711	26982.8	1.81178e-12	1.89181e-12	3.11806e-07	270.733	19.8328	20.7089	3.41322e+06	0.0226139	0.0236128	3891.84	0.138782	0.144913	23884.4	3.6305e-13	3.79086e-13	6.24807e-08	108.824	3.63559	3.79618	625683	0.0180034	0.0187986	3098.38	3.26051e-12	3.40453e-12	5.61132e-07
HAITI	332	Caribbean	20143.5	26077.7	67.9339	84.8625	65.5512	1.70943e+06	0.174494	0.134786	3514.92	7.86943e-14	6.07867e-14	1.58518e-09	79.5524	67.4951	52.1359	1359586	0.00614243	0.00474466	123.73	0.168024	0.129788	3384.59	1.35126e-13	1.04377e-13	2.72192e-09	22.7806	17.3674	13.4153	349840	0.0064701	0.00499776	130.33	2.22623e-14	1.71963e-14	4.4844e-10
INDIA	356	Southern Asia	5.80818e+06	6.34739e+06	58.9883	97.732	89.4297	567645056	0.0297321	0.0272064	172689	1.88157e-13	1.72173e-13	1.09285e-06	75.2107	71.3914	65.3267	414654112	0.0140336	0.0128415	81509.7	0.0192288	0.0175953	111684	1.06899e-13	9.78181e-14	6.20889e-07	15.0202	26.3406	24.103	152990944	0.0105033	0.00961103	61004.9	2.69414e-13	2.46528e-13	1.56481e-06
INDONESIA	360	South-eastern Asia	1.15059e+06	639888	220.118	26.1907	47.0939	30134788	0.178932	0.321739	205877	5.55226e-13	9.98359e-13	6.38837e-07	246.425	21.7892	39.1794	25070380	0.00875834	0.0157485	10077.3	0.175172	0.314979	201551	2.95183e-13	5.30773e-13	3.39635e-07	89.886	4.40158	7.91453	5.06441e+06	0.00375971	0.00676039	4325.89	8.15268e-13	1.46594e-12	9.38039e-07
ISRAEL	376	Western Asia	5252.67	1154.47	208.273	27.6803	125.941	145395	0.0105831	0.0481514	55.5894	1.46552e-11	6.66789e-11	7.69788e-08	278.361	19.2893	87.7637	101320	0.00117556	0.00534863	6.17483	0.00534034	0.0242978	28.0511	3.05238e-14	1.38879e-13	1.60331e-10	47.1508	8.39094	38.1776	44074.9	0.00524272	0.0238536	27.5383	2.92798e-11	1.33219e-10	1.53797e-07
COTE D'IVOIRE	384	Western Africa	137084	148454	269.707	21.3752	19.7381	2930199	0.0442162	0.0408296	6061.32	1.46215e-13	1.35017e-13	2.00437e-08	300.602	17.8622	16.4941	2.44861e+06	0.0143355	0.0132375	1965.16	0.0322606	0.0297898	4422.41	5.97589e-14	5.5182e-14	8.19198e-09	112.619	3.51308	3.24401	481586	0.0119556	0.0110399	1638.91	2.32671e-13	2.14851e-13	3.18955e-08
JAMAICA	388	Caribbean	3170.79	2828.59	248.97	23.1556	25.9569	73421.5	0.089119	0.0999006	282.578	4.44826e-13	4.98641e-13	1.41045e-09	294.745	18.2171	20.421	57762.7	0.00190294	0.00213316	6.03384	0.0882588	0.0989364	279.851	7.78332e-14	8.72494e-14	2.46793e-10	80.1142	4.93845	5.5359	15658.8	0.000860194	0.00096426	2.7275	8.11819e-13	9.10032e-13	2.57411e-09
JAPAN	392	Eastern Asia	22444.5	10204.2	83.8912	68.7204	151.153	1.5424e+06	0.170928	0.375962	3836.4	1.42197e-12	3.12767e-12	3.19155e-08	122.715	43.7549	96.2404	982058	0.0418233	0.0919917	938.703	0.152742	0.33596	3428.21	2.76733e-12	6.08683e-12	6.21114e-08	15.8474	24.9655	54.9125	560340	0.0181864	0.0400016	408.185	7.66149e-14	1.68517e-13	1.71959e-09
KENYA	404	Eastern Africa	18898.6	14716	267.207	21.5752	27.7074	407740	0.0198509	0.025493	375.154	1.03488e-13	1.32902e-13	1.95578e-09	431.55	12.4421	15.9785	235139	0.0202654	0.0260254	382.989	0.00508772	0.00653378	96.1508	5.8046e-14	7.45441e-14	1.09699e-09	43.3197	9.13303	11.7289	172602	0.0147632	0.0189592	279.003	1.4893e-13	1.9126e-13	2.81457e-09
S.KOREA	410	Eastern Asia	9729.81	5351.06	151.886	37.9565	69.0162	369309	0.277729	0.504994	2702.25	1.59563e-11	2.90132e-11	1.55251e-07	200.594	26.7675	48.6713	260443	0.143147	0.260284	1392.79	0.213476	0.388163	2077.08	3.17018e-11	5.76432e-11	3.08452e-07	35.3598	11.189	20.3449	108866	0.0642526	0.11683	625.165	2.10762e-13	3.83228e-13	2.05067e-09
LAO PEOPLEâ€™S DEMOCRATIC REPUBLIC	418	South-eastern Asia	13172.9	12898.2	197.707	29.1595	29.7807	384115	0.459651	0.469442	6054.93	1.90584e-12	1.94644e-12	2.51055e-08	230.333	23.3115	23.808	307080	0.104788	0.10702	1380.36	0.414359	0.423185	5458.3	3.50084e-12	3.57541e-12	4.61162e-08	67.6532	5.84806	5.97262	77035.8	0.0452925	0.0462572	596.633	3.10848e-13	3.17469e-13	4.09477e-09
LEBANON	422	Western Asia	6540.96	2624.7	78.9527	73.0189	181.969	477614	0.0828767	0.206535	542.093	1.71146e-10	4.2651e-10	1.11946e-06	91.3074	58.8057	146.549	384646	0.0951712	0.237174	622.511	0.0288749	0.0719585	188.869	4.76387e-14	1.18719e-13	3.11602e-10	27.8362	14.2132	35.4203	92967.6	0.0540018	0.134577	353.224	3.42245e-10	8.52901e-10	2.23861e-06
LIBERIA	430	Western Africa	3178.59	5672.53	94.2756	61.1509	34.2658	194374	0.282118	0.158084	896.737	4.41063e-13	2.47149e-13	1.40196e-09	104.943	51.1648	28.67	162632	0.0110241	0.00617731	35.041	0.279138	0.156414	887.265	5.83534e-13	3.26982e-13	1.85481e-09	39.6188	9.98618	5.59572	31741.9	0.00297974	0.00166969	9.47136	2.98592e-13	1.67315e-13	9.49102e-10
LIBYA	434	Northern Africa	16585.9	10512	195.082	29.5518	46.627	490143	0.00156919	0.00247588	26.0264	3.01009e-15	4.74934e-15	4.9925e-11	250.474	21.4369	33.8233	355550	0.000221547	0.000349557	3.67454	0.00139258	0.00219723	23.0972	5.98115e-15	9.4371e-15	9.92027e-11	48.7549	8.11488	12.8037	134592	0.000176608	0.000278653	2.9292	3.9024e-17	6.15723e-17	6.47247e-13
MADAGASCAR	450	Eastern Africa	24923.4	35711.9	239.934	24.0276	16.7689	598851	0.148414	0.103579	3699	1.14132e-13	7.96527e-14	2.84455e-09	260.621	20.6024	14.3784	513482	0.0174222	0.012159	434.222	0.139324	0.0972345	3472.43	1.53823e-13	1.07353e-13	3.8338e-09	115.507	3.42524	2.39048	85368.8	0.00909045	0.00634424	226.565	7.44404e-14	5.19521e-14	1.85531e-09
MALAWI	454	Eastern Africa	54834.3	82535.4	90.6483	63.5979	42.2528	3.48735e+06	0.0544578	0.0361803	2986.16	4.86505e-13	3.23221e-13	2.66772e-08	109.772	48.9139	32.4971	2682162	0.00799324	0.0053105	438.304	0.0265445	0.0176355	1455.55	6.71808e-13	4.46332e-13	3.68381e-08	26.9437	14.684	9.75564	805185	0.0279133	0.0185448	1530.61	3.01201e-13	2.0011e-13	1.65162e-08
MALI	466	Western Africa	131952	160687	172.228	33.4734	27.4875	4.41687e+06	0.00535269	0.00439549	706.298	2.95165e-14	2.42382e-14	3.89476e-09	193.282	27.7802	22.8124	3665648	0.00405542	0.0033302	535.12	0.000864102	0.000709578	114.02	7.75826e-15	6.37088e-15	1.02372e-09	69.4938	5.69317	4.67508	751224	0.00448859	0.00368591	592.278	5.12748e-14	4.21055e-14	6.76581e-09
MEXICO	484	Central America	105651	81305.3	64.7533	89.0308	115.69	9406230	0.245713	0.31929	25959.9	1.041e-12	1.35272e-12	1.09983e-07	74.1516	72.4111	94.094	7.65034e+06	0.0995056	0.129302	10512.9	0.175574	0.228147	18549.6	1.02105e-12	1.32679e-12	1.07875e-07	23.8056	16.6196	21.5962	1.75589e+06	0.0701396	0.0911423	7410.35	1.06095e-12	1.37865e-12	1.12091e-07
MOROCCO	504	Northern Africa	37985.6	24145.6	173.902	33.151	52.1528	1.25926e+06	0.0622536	0.0979365	2364.74	2.29443e-13	3.60957e-13	8.71553e-09	205.693	26.104	41.0665	991576	0.209889	0.330194	7972.75	0.0126454	0.0198936	480.343	2.07098e-13	3.25804e-13	7.86676e-09	56.1428	7.04703	11.0863	267686	0.0496082	0.0780429	1884.4	2.51788e-13	3.96109e-13	9.56431e-09
MOZAMBIQUE	508	Eastern Africa	80085.4	233275	208.037	27.7116	9.51363	2219292	0.102913	0.0353311	8241.86	3.20086e-13	1.09889e-13	2.56343e-08	205.976	26.0681	8.94942	2.08768e+06	0.0210429	0.00722423	1685.23	0.0869911	0.0298648	6966.72	3.10295e-13	1.06527e-13	2.48501e-08	240.738	1.64345	0.564211	131616	0.0159223	0.00546626	1275.14	3.29878e-13	1.1325e-13	2.64184e-08
NICARAGUA	558	Central America	57294.9	19126.6	198.864	28.9898	86.8407	1.66097e+06	0.0363983	0.109033	2085.44	2.46602e-14	7.38713e-14	1.4129e-09	231.315	23.2125	69.5345	1329958	0.00402686	0.0120627	230.718	0.0306568	0.0918344	1756.48	1.57069e-14	4.70511e-14	8.99926e-10	68.4821	5.77728	17.3062	331008	0.00574152	0.0171991	328.959	3.36135e-14	1.00691e-13	1.92588e-09
NIGER	562	Western Africa	97695.5	185041	185.281	31.1151	16.4278	3.03981e+06	0.00105701	0.00055807	103.266	6.43896e-16	3.39957e-16	6.29058e-11	198.703	27.0223	14.2669	2639954	0.000922511	0.000487056	90.1252	0.000399872	0.00021112	39.0657	1.28316e-15	6.77468e-16	1.25359e-10	96.6659	4.09286	2.1609	399854	0.000657142	0.00034695	64.1998	4.63264e-18	2.44589e-18	4.52589e-13
NIGERIA	566	Western Africa	2135572	2206770	152.509	37.8013	36.5817	80727320	0.0313083	0.0302982	66861.1	3.96892e-14	3.84087e-14	8.47591e-08	172.704	31.0902	30.0871	66395388	0.00639379	0.0061875	13654.4	0.025811	0.0249782	55121.2	7.54709e-14	7.3036e-14	1.61174e-07	58.9535	6.71105	6.49453	14331934	0.00549729	0.00531993	11739.9	3.90744e-15	3.78137e-15	8.34462e-09
PAKISTAN	586	Southern Asia	93729	93811.5	48.1596	119.707	119.602	11220013	0.0454042	0.0453643	4255.69	5.50795e-13	5.50311e-13	5.16255e-08	59.1575	90.7644	90.6845	8507256	0.118268	0.118164	11085.2	0.00717024	0.00716393	672.059	3.87963e-14	3.87622e-14	3.63634e-09	13.6698	28.9426	28.9171	2.71276e+06	0.038234	0.0382003	3583.63	1.06279e-12	1.06186e-12	9.96146e-08
PARAGUAY	600	South America	26626.4	29269.6	270.752	21.2927	19.3699	566948	0.0461926	0.0420211	1229.94	9.22088e-14	8.38817e-14	2.45519e-09	309.201	17.3654	15.7972	462378	0.0280053	0.0254762	745.68	0.0262849	0.0239112	699.872	1.72984e-13	1.57362e-13	4.60593e-09	100.74	3.92733	3.57267	104571	0.0199078	0.01811	530.072	1.1434e-14	1.04014e-14	3.04446e-10
PERU	604	South America	6896.48	4350.08	339.499	16.981	26.9212	117109	0.612476	0.971001	4223.93	6.20201e-13	9.83248e-13	4.2772e-09	354.723	15.1369	23.9976	104391	0.245413	0.389071	1692.49	0.521809	0.827261	3598.65	6.19725e-13	9.82493e-13	4.27392e-09	214.54	1.84413	2.92363	12718	0.0906664	0.14374	625.279	6.20677e-13	9.84003e-13	4.28049e-09
PHILIPPINES	608	South-eastern Asia	23053.7	25430.6	184.976	31.1665	28.2535	718504	0.240117	0.217675	5535.6	1.01794e-12	9.22798e-13	2.34673e-08	216.692	24.7789	22.463	571247	0.00695465	0.00630463	160.331	0.235662	0.213636	5432.89	5.28126e-13	4.78764e-13	1.21753e-08	61.9393	6.38755	5.79053	147257	0.00445512	0.00403872	102.707	1.50775e-12	1.36683e-12	3.47594e-08
GUINEA-BISSAU	624	Western Africa	15066.1	13183.7	207.029	27.8466	31.8225	419539	0.0750519	0.0857677	1130.74	5.98975e-13	6.84496e-13	9.02422e-09	233.197	23.0252	26.3127	346900	0.0033115	0.00378432	49.8915	0.0732366	0.0836933	1103.39	1.18418e-12	1.35326e-12	1.7841e-08	82.0598	4.82136	5.50975	72639.2	0.00181522	0.00207439	27.3483	1.37699e-14	1.57359e-14	2.07458e-10
TIMOR-LESTE	626	South-eastern Asia	3692.52	3901.45	106.736	54.0124	51.1199	199442	0.34792	0.329288	1284.7	1.20788e-13	1.1432e-13	4.46013e-10	127.368	42.1567	39.8991	155664	0.00300408	0.0028432	11.0926	0.346807	0.328235	1280.59	2.35161e-13	2.22567e-13	8.68336e-10	33.3713	11.8557	11.2208	43777.3	0.0011129	0.00105331	4.10942	6.41562e-15	6.07205e-15	2.36898e-11
RWANDA	646	Eastern Africa	6660.46	11580.7	137.549	41.9126	24.1054	279157	0.0698146	0.0401528	464.997	1.53786e-15	8.84478e-16	1.02429e-11	152.645	35.1757	20.2307	234286	0.208074	0.119671	1385.87	0	0	0	0	0	0	58.7265	6.73699	3.87467	44871.4	0.0698146	0.0401528	464.997	3.07573e-15	1.76896e-15	2.04858e-11
SAUDI ARABIA	682	Western Asia	3733.05	990.726	589.87	9.7734	36.8262	36484.6	0.000474055	0.00178624	1.76967	6.9082e-15	2.60301e-14	2.57887e-11	873.568	6.14651	23.1601	22945.3	0.000119982	0.000452092	0.4479	0.000410104	0.00154527	1.53094	1.37466e-14	5.17973e-14	5.13169e-11	109.085	3.62689	13.6661	13539.4	6.39511e-05	0.000240968	0.238733	6.97549e-17	2.62836e-16	2.60399e-13
SENEGAL	686	Western Africa	517742	635913	92.4722	62.3435	50.7583	32277830	0.0164715	0.0134107	8528.01	4.84728e-13	3.94652e-13	2.50964e-07	110.141	48.7501	39.6909	25239960	0.00186914	0.0015218	967.73	0.0152684	0.0124311	7905.09	9.6881e-13	7.88777e-13	5.01593e-07	29.1053	13.5934	11.0674	7.03787e+06	0.00120314	0.000979563	622.917	6.46792e-16	5.26599e-16	3.34871e-10
SIERRA LEONE	694	Western Africa	20738.7	26380.8	102.784	56.0886	44.0929	1163206	0.234815	0.184595	4869.76	1.48531e-13	1.16764e-13	3.08033e-09	116.313	46.1635	36.2905	957371	0.011027	0.00866863	228.685	0.232859	0.183057	4829.2	2.91415e-13	2.2909e-13	6.04357e-09	39.8624	9.92515	7.80245	205835	0.00195602	0.00153769	40.5654	5.64652e-15	4.43889e-15	1.17101e-10
VIET NAM	704	South-eastern Asia	310910	228655	67.2274	85.7544	116.603	26661908	0.311743	0.423889	96924.1	5.18214e-12	7.04635e-12	1.61118e-06	84.3261	63.6742	86.5802	19796972	0.0314658	0.0427853	9783.05	0.298418	0.40577	92781.3	1.01436e-11	1.37927e-11	3.15376e-06	17.9184	22.0801	30.0232	6864937	0.0133249	0.0181184	4142.86	2.20636e-13	3.00007e-13	6.85979e-08
SOUTH AFRICA	710	Southern Africa	124462	81884.5	213.214	27.0388	41.0982	3.36531e+06	0.00971199	0.014762	1208.77	5.10827e-14	7.76443e-14	6.35786e-09	254.287	21.1155	32.095	2.62808e+06	0.0122086	0.0185567	1519.5	0.00417076	0.00633944	519.101	8.34427e-14	1.26831e-13	1.03855e-08	66.794	5.92329	9.00323	737225	0.00554123	0.00842252	689.673	1.87227e-14	2.8458e-14	2.33027e-09
ZIMBABWE	716	Eastern Africa	96127.6	188214	107.401	53.6776	27.415	5159894	0.0849224	0.0433728	8163.38	3.99867e-13	2.04226e-13	3.84383e-08	120.979	44.383	22.6679	4.26643e+06	0.0573558	0.0292936	5513.47	0.0458787	0.0234318	4410.21	3.81156e-13	1.94669e-13	3.66396e-08	42.5668	9.29457	4.74706	893464	0.0390437	0.019941	3753.18	4.18579e-13	2.13783e-13	4.02369e-08
SUDAN	736	Northern Africa	993470	1.46128e+06	77.5753	74.3154	50.5243	73830136	0.00400488	0.00272277	3978.73	4.06246e-16	2.76192e-16	4.03593e-10	88.1589	60.906	41.4077	60508268	0.00991205	0.00673884	9847.33	0.000267764	0.000182043	266.016	5.88308e-16	3.99969e-16	5.84466e-10	29.5046	13.4094	9.11658	13321870	0.00373711	0.00254073	3712.71	2.24184e-16	1.52414e-16	2.2272e-10
SWAZILAND	748	Southern Africa	5777.16	6111.28	134.873	42.7442	40.4072	246940	0.314433	0.297242	1816.53	1.85949e-13	1.75783e-13	1.07426e-09	161.376	33.2725	31.4534	192221	0.0371678	0.0351358	214.724	0.302682	0.286134	1748.64	3.07954e-13	2.91118e-13	1.7791e-09	41.771	9.47165	8.95382	54719.3	0.0117512	0.0111087	67.8885	6.39445e-14	6.04485e-14	3.69418e-10
SYRIA	760	Western Asia	25903.3	10922.6	205.11	28.1071	66.6571	728066	0.00838976	0.0198967	217.322	1.00726e-13	2.38875e-13	2.60912e-09	226.268	23.7302	56.2772	614691	0.00550515	0.0130557	142.601	0.00541676	0.0128461	140.312	6.77056e-14	1.60566e-13	1.7538e-09	90.3938	4.37685	10.3799	113375	0.002973	0.0070506	77.0106	1.33745e-13	3.17183e-13	3.46445e-09
THAILAND	764	South-eastern Asia	114468	76291.2	188.513	30.5816	45.8851	3500625	0.0439631	0.0659629	5032.39	4.985e-13	7.47956e-13	5.70625e-08	239.603	22.4096	33.6237	2.56519e+06	0.0203408	0.0305196	2328.38	0.031289	0.0469464	3581.6	7.46842e-13	1.12057e-12	8.54897e-08	48.4141	8.172	12.2614	935436	0.0126741	0.0190165	1450.79	2.50159e-13	3.75341e-13	2.86352e-08
TOGO	768	Western Africa	26497.7	53757.7	76.3908	75.4677	37.1988	1.99972e+06	0.0524892	0.0258725	1390.84	1.72145e-13	8.4852e-14	4.56144e-09	89.1272	60.2443	29.695	1.59634e+06	0.0578291	0.0285045	1532.34	0.0311553	0.0153568	825.545	1.20012e-13	5.91551e-14	3.18004e-09	25.9888	15.2235	7.50381	403387	0.0213339	0.0105157	565.299	2.24278e-13	1.10549e-13	5.94285e-09
TURKEY	792	Western Asia	72192.4	28518.6	179.994	32.0291	81.0788	2.31225e+06	0.105404	0.266821	7609.35	9.99056e-13	2.52903e-12	7.21243e-08	211.488	25.3887	64.2693	1.83287e+06	0.150444	0.380836	10860.9	0.018508	0.0468514	1336.14	6.47664e-14	1.63951e-13	4.67564e-09	59.5808	6.64039	16.8096	479386	0.0868958	0.219969	6273.22	1.93335e-12	4.8941e-12	1.39573e-07
UGANDA	800	Eastern Africa	124444	193931	88.5178	65.1286	41.7926	8104875	0.0312594	0.0200589	3890.05	5.15808e-15	3.3099e-15	6.41893e-10	100.453	53.4517	34.2996	6651750	0.0550718	0.0353392	6853.37	0.000503751	0.000323254	62.6889	1.12333e-15	7.20834e-16	1.39792e-10	33.8822	11.6769	7.493	1453125	0.0307557	0.0197357	3827.36	9.19283e-15	5.89897e-15	1.14399e-09
EGYPT	818	Northern Africa	135363	46700.3	99.4347	57.9781	168.052	7848071	0.00188027	0.00545005	254.519	3.80019e-14	1.1015e-13	5.14403e-09	104.206	51.5266	149.352	6974780	0.000322661	0.000935247	43.6763	0.000379859	0.00110104	51.4186	1.30882e-14	3.79368e-14	1.77166e-09	61.3253	6.4515	18.6999	873291	0.00150042	0.00434901	203.1	6.29155e-14	1.82363e-13	8.51641e-09
TANZANIA	834	Eastern Africa	62044.9	107460	209.647	27.4989	15.8772	1.70616e+06	0.0571643	0.0330054	3546.75	7.44377e-13	4.29787e-13	4.61848e-08	223.271	24.0488	13.8852	1.4921e+06	0.0192821	0.011133	1196.35	0.0241093	0.0139202	1495.86	4.33206e-13	2.50123e-13	2.68782e-08	114.676	3.45005	1.99199	214058	0.033055	0.0190852	2050.9	1.05555e-12	6.0945e-13	6.54913e-08
USA	840	Northern America	1.60257e+06	557914	190.593	30.2479	86.8848	48474268	0.00828949	0.023811	13284.5	8.17176e-13	2.34728e-12	1.30958e-06	228.363	23.5126	67.5381	37680480	0.00331233	0.00951442	5308.23	0.00705652	0.0202693	11308.6	5.89739e-13	1.69398e-12	9.45097e-07	58.7412	6.7353	19.3467	10793787	0.00123297	0.00354161	1975.91	1.04461e-12	3.00058e-12	1.67406e-06
BURKINA FASO	854	Western Africa	185428	228381	98.4799	58.5403	47.5302	10854990	0.00406965	0.00330424	754.626	1.32529e-15	1.07603e-15	2.45745e-10	114.115	47.0524	38.2029	8724821	0.00525403	0.00426586	974.243	0.000311662	0.000253045	57.7907	6.83888e-16	5.55264e-16	1.26812e-10	34.4398	11.4879	9.32725	2130169	0.00375799	0.00305119	696.835	1.96668e-15	1.59679e-15	3.64678e-10
UZBEKISTAN	860	Central Asia	9843.46	7307.63	125.651	45.8814	61.8027	451631	0.0314223	0.0423261	309.304	3.59356e-15	4.84056e-15	3.5373e-11	134.463	39.9322	53.7892	393071	0.0992924	0.133748	977.381	0	0	0	0	0	0	66.5038	5.94913	8.01355	58560.1	0.0314223	0.0423261	309.304	7.18712e-15	9.68112e-15	7.07461e-11
ZAMBIA	894	Eastern Africa	41398.7	115714	108.324	53.2202	19.0405	2.20325e+06	0.0929423	0.0332518	3847.69	1.45017e-13	5.18825e-14	6.00353e-09	116.427	46.1182	16.4996	1.90924e+06	0.137646	0.0492453	5698.37	0.0297316	0.010637	1230.85	1.49102e-13	5.33439e-14	6.17263e-09	55.7083	7.10199	2.54087	294014	0.0632106	0.0226147	2616.84	1.40933e-13	5.04212e-14	5.83443e-09

## Sheet: Maize_Country_Level
Country	Country	Sub Region	Dry Production	Crop Area	Nutrient Use Efficiency	Fertiliser Input N&P			Nutrient Loading (N&P) to Aquatic Receptors			Aquatic Species Richness Impact Freshwater and Marine Combined			Nutrient Use Efficiency	N Input			N Load Freshwater			N Load Marine			N Marine Demersal Species Richness impact			Nutrient Use Efficiency	P Input			P Load Freshwater			P Freshwater Fish Species Richness impact
Name	Code		per country	per country		Per Tonne Crop	Per Hectare	Total	Per Tonne Crop	Per Hectare	Total	Per Tonne Crop	Per Hectare	Total	Nitrogen	Per Tonne Crop	Per Hectare	Total	Per Tonne Crop	Per Hectare	Total	Per Tonne Crop	Per Hectare	Total	Per Tonne Crop	Per Hectare	Total	Phopshours	Per Tonne Crop	Per Hectare	Total	Per Tonne Crop	Per Hectare	Total	Per Tonne Crop	Per Hectare	Total
			Tonne	ha	%	kg/tonne crop	kg/ha	kg	kg/tonne crop	kg/ha	kg	PDF.yr/tonne crop	PDF.yr/ha	PDF.yr	%	kg/tonne crop	kg/ha	kg	kg/tonne crop	kg/ha	kg	kg/tonne crop	kg/ha	kg	PDF.yr/tonne crop	PDF.yr/ha	PDF.yr	%	kg/tonne crop	kg/ha	kg	kg/tonne crop	kg/ha	kg	PDF.yr/tonne crop	PDF.yr/ha	PDF.yr
AFGHANISTAN	4	Southern Asia	100873	96317.2	148.588	10.0089	10.4822	1.00962e+06	0.0635061	0.0665097	6406.03	2.19574e-13	2.29959e-13	2.2149e-08	131.872	9.34241	9.78427	942393	0.18145	0.190032	18303.4	0.00618913	0.00648186	624.314	2.64336e-14	2.76838e-14	2.66642e-09	382.921	0.666456	0.697977	67227.2	0.057317	0.0600278	5781.71	4.12715e-13	4.32235e-13	4.16316e-08
ALBANIA	8	Southern Europe	166060	52691.7	37.0745	40.1138	126.42	6.6613e+06	0.182938	0.576539	30378.8	5.45825e-13	1.72019e-12	9.06399e-08	38.1126	32.3253	101.875	5367942	0.215221	0.678278	35739.6	0.0229221	0.07224	3806.45	1.47997e-13	4.66419e-13	2.45764e-08	32.7662	7.78851	24.5458	1.29336e+06	0.160016	0.504299	26572.3	9.43653e-13	2.97397e-12	1.56703e-07
ANGOLA	24	Middle Africa	382831	724227	74.3849	19.9933	10.5686	7.65406e+06	0.121288	0.0641136	46432.8	3.4626e-13	1.83035e-13	1.32559e-07	64.5195	19.095	10.0937	7.31016e+06	0.0245039	0.0129529	9380.86	0.114406	0.0604755	43798	5.59415e-13	2.95711e-13	2.14162e-07	284.093	0.898297	0.474845	343896	0.00688232	0.00363804	2634.77	1.33105e-13	7.03599e-14	5.09565e-08
AZERBAIJAN	31	Western Asia	72545.2	24034.3	216.412	6.87209	20.7427	498537	0.0421062	0.127094	3054.61	7.9823e-16	2.40938e-15	5.79077e-11	185.614	6.63742	20.0344	481513	0.0299918	0.0905275	2175.76	0.0254623	0.0768554	1847.17	0	0	0	1087.47	0.234672	0.708335	17024.3	0.016644	0.0502382	1207.44	1.59646e-15	4.81876e-15	1.15815e-10
ARGENTINA	32	South America	13791249	2780444	119.49	12.4462	61.7343	171648816	0.00632942	0.0313945	87290.7	3.76726e-14	1.86859e-13	5.19552e-07	126.263	9.7574	48.3976	134566720	0.00148748	0.00737803	20514.2	0.00585117	0.0290223	80695	7.43118e-14	3.68593e-13	1.02485e-06	94.9117	2.68881	13.3368	37082096	0.000478253	0.00237218	6595.71	1.03341e-15	5.1258e-15	1.4252e-08
AUSTRALIA	36	Australia and New Zealand	318863	68498.7	101.883	14.5971	67.9499	4654480	0.00343078	0.0159704	1093.95	1.63117e-14	7.59313e-14	5.20119e-09	110.454	11.154	51.9219	3556585	0.00239829	0.0111641	764.725	0.0018732	0.00871977	597.293	2.69386e-14	1.254e-13	8.58972e-09	74.118	3.44316	16.028	1097895	0.00155758	0.00725058	496.655	5.68477e-15	2.64627e-14	1.81266e-09
AUSTRIA	40	Western Europe	1.49288e+06	179807	52.6911	28.2249	234.342	42136276	0.12943	1.07461	193223	3.63534e-13	3.0183e-12	5.42711e-07	51.6168	23.8682	198.17	35632272	0.0848619	0.704581	126689	0.118487	0.983755	176886	7.24621e-13	6.01629e-12	1.08177e-06	58.5766	4.35669	36.1722	6504004	0.0109434	0.0908594	16337.2	2.44683e-15	2.03152e-14	3.65281e-09
BELGIUM	56	Western Europe	144135	25481.4	20.1466	73.8191	417.558	10639940	0.0407149	0.230304	5868.46	1.6845e-12	9.5284e-12	2.42797e-07	21.2978	57.8463	327.208	8337706	0.0029139	0.0164825	419.996	0.0402409	0.227623	5800.14	3.369e-12	1.90568e-11	4.85592e-07	15.9772	15.9727	90.3498	2.30223e+06	0.000473998	0.00268117	68.3199	8.56491e-18	4.84475e-17	1.23451e-12
BHUTAN	64	Southern Asia	53687	38589.6	24.8669	59.8064	83.2044	3.21082e+06	1.50556	2.09458	80828.9	2.16956e-12	3.01836e-12	1.16477e-07	25.9401	47.4939	66.075	2549807	0.226261	0.314781	12147.3	1.42066	1.97647	76271.2	3.25397e-12	4.52703e-12	1.74696e-07	20.727	12.3124	17.1294	661017	0.0848944	0.118108	4557.73	1.08516e-12	1.5097e-12	5.82587e-08
BOLIVIA	68	South America	499911	285320	116.611	12.7535	22.3455	6.37562e+06	0.0943206	0.16526	47151.9	1.964e-13	3.44114e-13	9.81825e-08	113.348	10.8692	19.0439	5433621	0.0886191	0.15527	44301.7	0.0684782	0.119981	34233	3.36876e-13	5.90243e-13	1.68408e-07	135.433	1.88433	3.30154	941996	0.0258424	0.0452786	12918.9	5.59236e-14	9.79841e-14	2.79568e-08
BOSNIA AND HERZEGOVINA	70	Southern Europe	667130	205474	82.5365	18.0187	58.5028	12020810	0.13389	0.434714	89322.3	3.85035e-12	1.25013e-11	2.56868e-06	78.8292	15.6287	50.7431	10426388	0.140021	0.454617	93411.9	0.0624184	0.202659	41641.2	4.75103e-13	1.54256e-12	3.16955e-07	106.78	2.38997	7.75973	1.59442e+06	0.071472	0.232054	47681.1	7.22559e-12	2.346e-11	4.82041e-06
BRAZIL	76	South America	30272082	11190628	37.0659	40.1231	108.538	1214610048	0.0713246	0.192942	2.15914e+06	3.28812e-13	8.89478e-13	9.95382e-06	40.0399	30.7693	83.2348	931450048	0.0593457	0.160538	1.79652e+06	0.0493372	0.133463	1.49354e+06	3.90749e-13	1.05703e-12	1.18288e-05	27.2829	9.35383	25.3033	283160032	0.0219874	0.0594787	665604	2.66875e-13	7.21931e-13	8.07886e-06
BULGARIA	100	Eastern Europe	1.0935e+06	409136	144.863	10.2662	27.4386	11226132	0.0531352	0.142015	58103.5	3.0883e-13	8.25412e-13	3.37706e-07	140.381	8.77614	23.456	9596718	0.0347573	0.0928961	38007.2	0.0417392	0.111557	45641.9	6.09316e-13	1.62852e-12	6.66288e-07	171.265	1.49009	3.98257	1.62941e+06	0.011396	0.0304581	12461.5	8.34416e-15	2.23015e-14	9.12435e-09
MYANMAR	104	South-eastern Asia	386878	223737	62.9534	23.6238	40.8494	9139537	0.260405	0.450282	100745	3.14883e-12	5.44483e-12	1.21821e-06	63.9687	19.2594	33.3027	7.45105e+06	0.0506405	0.0875656	19591.7	0.240414	0.415715	93010.8	6.43261e-13	1.1123e-12	2.48863e-07	58.4731	4.3644	7.54676	1.68849e+06	0.0199906	0.0345671	7733.94	5.65439e-12	9.77736e-12	2.18756e-06
BURUNDI	108	Eastern Africa	110003	111446	79.2446	18.7672	18.5243	2.06445e+06	0.073058	0.0721122	8036.6	1.36265e-13	1.34501e-13	1.49896e-08	76.0919	16.1909	15.9813	1.78105e+06	0.0358753	0.0354109	3946.39	0	0	0	0	0	0	99.0585	2.57626	2.5429	283396	0.073058	0.0721122	8036.6	2.7253e-13	2.69002e-13	2.99792e-08
CAMBODIA	116	South-eastern Asia	112211	58669.6	72.9639	20.3827	38.9836	2287151	0.0271971	0.0520167	3051.8	6.68999e-13	1.27952e-12	7.50688e-08	73.0838	16.8574	32.2411	1891573	0.00390582	0.00747021	438.274	0.0226949	0.0434059	2546.61	1.32774e-12	2.53942e-12	1.48987e-07	72.3906	3.52532	6.74247	395578	0.00450218	0.00861079	505.192	1.02543e-14	1.96122e-14	1.15064e-09
CAMEROON	120	Middle Africa	648470	314053	56.5057	26.3195	54.3454	17067370	0.0881598	0.182036	57169	1.88836e-13	3.89916e-13	1.22454e-07	55.9933	22.0026	45.4318	14268028	0.0133568	0.0275797	8661.49	0.0838289	0.173093	54360.5	3.52741e-13	7.28354e-13	2.28742e-07	59.1173	4.31684	8.91359	2.79934e+06	0.00433092	0.00894266	2808.47	2.49305e-14	5.14774e-14	1.61666e-08
CANADA	124	Northern America	7353143	1153914	42.822	34.7298	221.311	255373520	0.0925073	0.589489	680220	3.1519e-13	2.0085e-12	2.31764e-06	39.1574	31.4628	200.492	231350288	0.0402439	0.256448	295919	0.0898986	0.572866	661038	6.30346e-13	4.01679e-12	4.63503e-06	78.1128	3.26707	20.8189	24023234	0.0026087	0.0166235	19182.1	3.34102e-17	2.12901e-16	2.4567e-10
CENTRAL AFRICAN REPUBLIC	140	Middle Africa	82949.9	93792.7	29.9113	49.7204	43.9725	4.1243e+06	0.0997896	0.0882535	8277.54	1.29912e-13	1.14894e-13	1.07762e-08	30.2201	40.7675	36.0546	3.38166e+06	0.0280611	0.0248172	2327.67	0.0893382	0.0790103	7410.59	2.57506e-13	2.27737e-13	2.13601e-08	28.5047	8.9529	7.91791	742642	0.0104514	0.00924318	866.943	2.3189e-15	2.05082e-15	1.92352e-10
CHAD	148	Middle Africa	71758.4	93686	55.2994	26.8936	20.599	1.92984e+06	0.00339108	0.00259738	243.338	2.19417e-15	1.68061e-15	1.5745e-10	53.2617	23.1311	17.7171	1.65985e+06	0.00259246	0.00198568	186.031	0.00190706	0.00146071	136.848	4.36014e-15	3.33963e-15	3.12877e-10	67.8262	3.76256	2.88191	269995	0.00148402	0.00113668	106.491	2.81945e-17	2.15954e-17	2.02319e-12
CHILE	152	South America	738125	90445.9	30.5166	48.7341	397.718	35971912	0.454924	3.71262	335791	1.86012e-13	1.51804e-12	1.373e-07	30.9371	39.8227	324.992	29394146	0.0787934	0.64303	58159.4	0.437008	3.5664	322566	2.62407e-13	2.14149e-12	1.93689e-07	28.6373	8.91145	72.726	6577766	0.0179167	0.146217	13224.7	1.09616e-13	8.94576e-13	8.09107e-08
CHINA	156	Eastern Asia	102666520	24306342	25.3069	58.7665	248.221	6033351680	0.210153	0.887657	21575696	1.61125e-12	6.80569e-12	0.000165421	23.8154	51.7313	218.505	5311067648	0.291601	1.23168	29937704	0.181231	0.765495	18606378	2.11493e-12	8.93314e-12	0.000217132	36.2745	7.03525	29.7159	722284224	0.028922	0.122162	2.96932e+06	1.10757e-12	4.67823e-12	0.000113711
TAIWAN	158		184812	38061	27.8701	53.3618	259.108	9861904	0.482006	2.34047	89080.6	1.25052e-11	6.07211e-11	2.31111e-06	27.5917	44.651	216.811	8252056	0.0793971	0.385527	14673.6	0.465797	2.26176	86085	1.36456e-12	6.62586e-12	2.52187e-07	29.2972	8.71072	42.2965	1609848	0.0162089	0.0787052	2995.6	2.36458e-11	1.14816e-10	4.37002e-06
COLOMBIA	170	South America	876702	503583	26.9682	55.1464	96.0059	48346960	0.456341	0.794458	400075	1.17615e-12	2.04759e-12	1.03113e-06	27.0314	45.5766	79.3456	39957128	0.148169	0.257951	129900	0.413299	0.719524	362340	8.30376e-13	1.44562e-12	7.27992e-07	26.6673	9.56977	16.6603	8389834	0.0430422	0.0749333	37735.1	1.52192e-12	2.64955e-12	1.33427e-06
CONGO D.C	180	Middle Africa	1.02011e+06	1.45024e+06	73.441	20.2503	14.2443	20657584	0.108328	0.076199	110507	2.35109e-13	1.65378e-13	2.39838e-07	67.4189	18.2738	12.854	18641364	0.0345973	0.0243361	35293.1	0.0876334	0.0616425	89396.1	3.51659e-13	2.47361e-13	3.58732e-07	129.119	1.97647	1.39027	2.01622e+06	0.0206942	0.0145566	21110.5	1.18558e-13	8.33952e-14	1.20943e-07
CROATIA	191	Southern Europe	1.7436e+06	385339	46.8844	31.7206	143.531	55308120	0.124257	0.562243	216654	4.33384e-13	1.961e-12	7.5565e-07	44.9749	27.3931	123.95	47762656	0.0791576	0.358177	138019	0.116812	0.528556	203674	7.5242e-13	3.40459e-12	1.31192e-06	58.9715	4.32751	19.5814	7545465	0.0074447	0.0336862	12980.6	1.14349e-13	5.1741e-13	1.99379e-07
CUBA	192	Caribbean	233869	130274	33.2941	44.6686	80.189	10446585	0.0221576	0.0397773	5181.97	1.5422e-13	2.76856e-13	3.60673e-08	35.9307	34.2882	61.5542	8.01894e+06	0.00102167	0.00183411	238.937	0.0207255	0.0372065	4847.06	2.79182e-14	5.01187e-14	6.52919e-09	24.5849	10.3804	18.6348	2.42764e+06	0.00143206	0.00257083	334.913	2.80522e-13	5.03593e-13	6.56054e-08
CZECHIA	203	Eastern Europe	250637	42628.3	60.9483	24.401	143.468	6115802	0.106903	0.628548	26793.9	3.82918e-13	2.2514e-12	9.59735e-08	55.9149	22.0335	129.548	5.52241e+06	0.0812601	0.477777	20366.8	0.096391	0.566741	24159.2	7.65019e-13	4.498e-12	1.91742e-07	107.792	2.36751	13.92	593387	0.0105121	0.0618071	2634.73	8.16414e-16	4.80019e-15	2.04624e-10
BENIN	204	Western Africa	423006	419064	33.4409	44.4725	44.8909	18812122	0.11152	0.112569	47173.7	1.23568e-13	1.2473e-13	5.22699e-08	32.6281	37.7588	38.114	15972195	0.00689816	0.00696305	2917.96	0.10853	0.109551	45909	2.27183e-13	2.2932e-13	9.60998e-08	38.0119	6.71369	6.77684	2.83993e+06	0.00298984	0.00301797	1264.72	1.99523e-14	2.014e-14	8.43995e-09
ECUADOR	218	South America	461791	443639	12.4153	119.788	124.689	55316856	0.905484	0.942533	418144	6.45222e-13	6.71622e-13	2.97958e-07	12.429	99.1231	103.179	45774120	0.246902	0.257004	114017	0.828773	0.862683	382720	8.57856e-13	8.92956e-13	3.9615e-07	12.3496	20.6646	21.5102	9542738	0.0767109	0.0798496	35424.4	4.32588e-13	4.50288e-13	1.99765e-07
EL SALVADOR	222	Central America	527628	273173	21.9976	67.6074	130.582	35671564	0.803679	1.55229	424044	6.32104e-13	1.2209e-12	3.33516e-07	20.4236	60.3225	116.512	31827822	0.0375172	0.0724637	19795.1	0.797394	1.54015	420727	3.1239e-13	6.03374e-13	1.64826e-07	35.0311	7.28495	14.0707	3.84374e+06	0.00628558	0.0121405	3316.45	9.51818e-13	1.83842e-12	5.02206e-07
ETHIOPIA	231	Eastern Africa	1.98197e+06	1.17466e+06	24.4145	60.9146	102.78	120731000	0.0926889	0.156392	183707	1.72334e-13	2.90775e-13	3.4156e-07	25.3175	48.662	82.1062	96446560	0.085345	0.144001	169151	0.0181563	0.0306348	35985.3	8.50072e-14	1.43431e-13	1.68482e-07	20.8281	12.2527	20.6737	24284440	0.0745325	0.125757	147721	2.5966e-13	4.38119e-13	5.14639e-07
FRANCE	250	Western Europe	13240833	1753300	40.7114	36.5303	275.875	483691392	0.128096	0.967371	1.69609e+06	7.68346e-13	5.80251e-12	1.01735e-05	37.4895	32.8625	248.176	435127200	0.0292666	0.22102	387514	0.126045	0.951889	1.66895e+06	1.53096e-12	1.15617e-11	2.02712e-05	69.5793	3.66776	27.6987	48564188	0.00205014	0.0154825	27145.5	5.73352e-15	4.32993e-14	7.59167e-08
GEORGIA	268	Western Asia	368185	197341	35.1768	42.2778	78.8788	15566042	0.328116	0.612176	120807	1.29443e-12	2.41506e-12	4.76591e-07	32.7436	37.6257	70.1992	13853199	0.629637	1.17473	231823	0.126255	0.235557	46485.1	2.55437e-12	4.76576e-12	9.40482e-07	54.8566	4.65213	8.6796	1.71284e+06	0.201862	0.376619	74322.4	3.44921e-14	6.43528e-14	1.26995e-08
GERMANY	276	Western Europe	2.62224e+06	346828	46.7687	31.799	240.42	83384584	0.0819213	0.619376	214817	5.8172e-13	4.39817e-12	1.52541e-06	44.9508	27.4077	207.219	71869544	0.0274562	0.207586	71996.6	0.0797737	0.603139	209186	1.16317e-12	8.79432e-12	3.05012e-06	58.1149	4.3913	33.201	11515041	0.00214757	0.0162369	5631.43	2.66718e-16	2.01656e-15	6.99399e-10
GHANA	288	Western Africa	918563	698924	84.1969	17.6634	23.2141	16224916	0.0220149	0.0289331	20222	5.11699e-14	6.72503e-14	4.70028e-08	80.6132	15.2829	20.0856	14038274	0.0232322	0.030533	21340.3	0.0110985	0.0145862	10194.7	2.4137e-14	3.17222e-14	2.21714e-08	107.204	2.3805	3.12858	2.18664e+06	0.0109164	0.0143469	10027.4	7.82029e-14	1.02778e-13	7.18343e-08
GREECE	300	Southern Europe	1.72788e+06	200626	52.3734	28.3961	244.56	49065012	0.0570282	0.491151	98537.8	1.1622e-12	1.00094e-11	2.00814e-06	48.5298	25.3864	218.639	43864684	0.109904	0.946542	189901	0.0303336	0.261246	52412.8	4.02551e-14	3.46694e-13	6.95558e-08	84.7936	3.00966	25.9205	5.20033e+06	0.0266946	0.229905	46125	2.28415e-12	1.96721e-11	3.94673e-06
GUATEMALA	320	Central America	906086	599582	15.355	96.8547	146.366	87758736	0.652262	0.985695	591005	5.06743e-13	7.65787e-13	4.59153e-07	15.1633	81.249	122.783	73618568	0.129299	0.195396	117156	0.610785	0.923016	553424	5.50242e-13	8.31523e-13	4.98567e-07	16.3529	15.6058	23.5834	14140167	0.0414762	0.0626786	37581	4.63243e-13	7.00051e-13	4.19738e-07
GUINEA	324	Western Africa	72260.4	75920.9	105.498	14.097	13.4173	1.01865e+06	0.117243	0.11159	8472	1.64416e-12	1.56488e-12	1.18808e-07	97.6579	12.6155	12.0072	911599	0.0272413	0.0259278	1968.46	0.0933639	0.0888624	6746.51	1.87826e-13	1.7877e-13	1.35724e-08	172.255	1.48153	1.41009	107056	0.0238788	0.0227275	1725.49	3.10049e-12	2.951e-12	2.24043e-07
HAITI	332	Caribbean	180986	270614	13.9268	106.787	71.4192	19327004	0.207704	0.138913	37591.6	9.19268e-14	6.14807e-14	1.66375e-08	14.281	86.2684	57.6963	15613415	0.00732882	0.00490152	1326.42	0.200217	0.133905	36236.5	1.58099e-13	1.05736e-13	2.86137e-08	12.4375	20.5186	13.7228	3.71359e+06	0.00748759	0.0050077	1355.15	2.57551e-14	1.7225e-14	4.66132e-09
HONDURAS	340	Central America	446350	364528	13.9427	106.665	130.607	47609876	0.660002	0.808146	294592	1.20012e-12	1.4695e-12	5.35674e-07	13.397	91.961	112.603	41046780	0.278096	0.340518	124128	0.571564	0.699857	255117	4.40261e-13	5.39082e-13	1.9651e-07	17.3559	14.7039	18.0044	6563097	0.0884385	0.108289	39474.5	1.95998e-12	2.39992e-12	8.74838e-07
HUNGARY	348	Eastern Europe	5315284	1103397	52.5409	28.3056	136.354	150452064	0.0622066	0.299662	330646	2.53907e-13	1.22312e-12	1.34959e-06	47.3022	26.0453	125.465	138438176	0.0334438	0.161105	177763	0.0602465	0.29022	320227	5.07281e-13	2.44368e-12	2.69634e-06	112.908	2.26025	10.8881	12013886	0.00196009	0.00944215	10418.4	5.33652e-16	2.57071e-15	2.83651e-09
INDIA	356	Southern Asia	8635219	6.38875e+06	23.7486	62.6225	84.6424	540759296	0.0782681	0.105789	675862	2.46108e-13	3.32647e-13	2.1252e-06	24.8613	49.555	66.98	427918304	0.0904283	0.122225	780868	0.0431839	0.0583686	372902	2.82811e-13	3.82255e-13	2.44213e-06	19.5293	13.0675	17.6625	112840960	0.0350843	0.0474209	302960	2.09405e-13	2.83038e-13	1.80826e-06
INDONESIA	360	South-eastern Asia	7.92504e+06	3160843	34.6241	42.9527	107.693	340402240	0.208445	0.522624	1.65193e+06	3.69098e-13	9.25424e-13	2.92512e-06	31.8011	38.7408	97.1332	307022688	0.00955746	0.023963	75743.3	0.206766	0.518414	1.63863e+06	4.32316e-13	1.08393e-12	3.42613e-06	60.5901	4.21191	10.5603	33379544	0.00167912	0.00420998	13307.1	3.05881e-13	7.66921e-13	2.42412e-06
IRAN	364	Southern Asia	966282	173626	112.254	13.2485	73.732	12801782	0.0326896	0.181928	31587.4	6.97197e-14	3.88012e-13	6.73689e-08	106.315	11.5882	64.492	11197470	0.0439284	0.244475	42447.2	0.00928132	0.0516535	8968.37	2.91476e-14	1.62216e-13	2.81648e-08	153.708	1.66029	9.24006	1.60431e+06	0.0234083	0.130275	22619	1.10292e-13	6.13809e-13	1.06573e-07
IRAQ	368	Western Asia	128279	75033.4	12.2179	121.723	208.099	15614408	0.100471	0.171768	12888.3	6.8259e-14	1.16697e-13	8.75617e-09	11.466	107.448	183.695	13783282	0.537537	0.918983	68954.5	0.0319734	0.0546623	4101.5	1.22719e-13	2.09803e-13	1.57422e-08	17.8779	14.2746	24.4041	1.83113e+06	0.0684979	0.117105	8786.81	1.37991e-14	2.35912e-14	1.77013e-09
ITALY	380	Southern Europe	8414661	1.02961e+06	39.0555	38.0792	311.209	320423456	0.0485151	0.396498	408238	7.1575e-14	5.84959e-13	6.02279e-07	38.6446	31.8802	260.547	268261424	0.0354426	0.28966	298237	0.0445991	0.364494	375286	1.15349e-13	9.42707e-13	9.7062e-07	41.1683	6.19895	50.662	52162036	0.00391595	0.0320038	32951.4	2.78012e-14	2.2721e-13	2.33938e-07
COTE D'IVOIRE	384	Western Africa	603430	753829	46.5628	31.9396	25.5673	19273340	0.09	0.0720439	54308.7	1.88895e-13	1.51208e-13	1.13985e-07	43.6336	28.2351	22.6018	17037918	0.0284154	0.0227461	17146.7	0.0763535	0.06112	46074.1	1.09067e-13	8.73063e-14	6.5814e-08	68.8887	3.70452	2.96542	2.23542e+06	0.0136465	0.0109238	8234.69	2.68724e-13	2.1511e-13	1.62156e-07
KAZAKHSTAN	398	Central Asia	228353	79126.1	331.155	4.49095	12.9606	1.02552e+06	0.0162636	0.0469358	3713.85	1.72017e-15	4.96432e-15	3.92808e-10	306.945	4.01375	11.5835	916554	0.0617195	0.178119	14093.8	0.000364855	0.00105295	83.3159	2.61276e-15	7.54028e-15	5.96633e-10	534.79	0.477197	1.37716	108969	0.0158987	0.0458829	3630.53	8.27589e-16	2.38837e-15	1.88983e-10
KENYA	404	Eastern Africa	2.11548e+06	1.55339e+06	33.7498	44.0655	60.0103	93219680	0.0205335	0.0279634	43438.1	1.02832e-13	1.40042e-13	2.1754e-07	36.4029	33.8435	46.0896	71595232	0.0236364	0.0321891	50002.4	0.00596215	0.00811952	12612.8	5.76279e-14	7.84802e-14	1.21911e-07	24.9658	10.222	13.9208	21624450	0.0145713	0.0198439	30825.3	1.48037e-13	2.01603e-13	3.13169e-07
N. KOREA	408	Eastern Asia	1.29113e+06	537006	27.2008	54.6749	131.456	70592640	0.626543	1.50641	808951	7.00457e-12	1.68412e-11	9.04384e-06	25.3103	48.6759	117.032	62847092	0.470754	1.13184	607806	0.523911	1.25965	676439	1.39757e-11	3.3602e-11	1.80445e-05	42.5402	5.99903	14.4236	7745546	0.102632	0.24676	132512	3.34798e-14	8.04962e-14	4.32269e-08
S.KOREA	410	Eastern Asia	59940.9	16777	14.3547	103.604	370.156	6210098	1.16667	4.16827	69931.1	1.70811e-11	6.10272e-11	1.02385e-06	15.0327	81.9549	292.809	4.91245e+06	0.401635	1.43496	24074.4	1.11681	3.99015	66942.7	3.39894e-11	1.21437e-10	2.03736e-06	11.7882	21.6488	77.347	1.29765e+06	0.049855	0.178122	2988.35	1.72672e-13	6.16923e-13	1.03501e-08
KYRGYZSTAN	417	Central Asia	282128	58503.7	554.538	2.68187	12.9331	756632	0.134623	0.649205	37980.9	3.90914e-15	1.88514e-14	1.10288e-09	463.072	2.66049	12.83	750600	0.446868	2.15498	126074	0	0	0	0	0	0	11935.6	0.0213813	0.103109	6032.27	0.134623	0.649205	37980.9	7.81828e-15	3.77029e-14	2.20576e-09
LAO PEOPLEâ€™S DEMOCRATIC REPUBLIC	418	South-eastern Asia	94968	44150.8	79.0607	18.8109	40.4621	1786431	0.27328	0.587824	25952.9	5.97752e-13	1.28576e-12	5.67673e-08	83.8873	14.6864	31.5903	1.39474e+06	0.0613548	0.131974	5826.75	0.249	0.535596	23647	1.04443e-12	2.24657e-12	9.91878e-08	61.8742	4.1245	8.87177	391695	0.0242806	0.0522275	2305.88	1.5107e-13	3.24951e-13	1.43469e-08
LESOTHO	426	Southern Africa	93661.9	115411	19.1952	77.4779	62.8771	7.25672e+06	1.59247	1.29237	149153	9.34305e-11	7.58235e-11	8.75088e-06	19.4288	63.4111	51.4612	5939200	2.90186	2.355	271793	0.0291144	0.0236278	2726.91	1.44196e-13	1.17022e-13	1.35057e-08	18.142	14.0668	11.4159	1.31752e+06	1.56335	1.26874	146427	1.86717e-10	1.5153e-10	1.74883e-05
MADAGASCAR	450	Eastern Africa	103259	121236	74.5104	19.9596	17.0001	2.06101e+06	0.164186	0.139841	16953.7	1.08101e-13	9.20721e-14	1.11624e-08	71.9671	17.1189	14.5806	1.76769e+06	0.0135072	0.0115044	1394.74	0.158574	0.135061	16374.2	1.55419e-13	1.32373e-13	1.60484e-08	89.8376	2.84068	2.41947	293326	0.0056112	0.00477919	579.408	6.07836e-14	5.17707e-14	6.27646e-09
MALAWI	454	Eastern Africa	740235	644195	43.6433	34.0762	39.1565	25224436	0.0529215	0.0608113	39174.3	3.66363e-13	4.20982e-13	2.71195e-07	41.1748	29.9212	34.3821	22148758	0.00780833	0.00897243	5780	0.036941	0.0424484	27345	4.92763e-13	5.66227e-13	3.64761e-07	61.4199	4.155	4.77445	3075679	0.0159805	0.0183629	11829.3	2.39962e-13	2.75737e-13	1.77628e-07
MALI	466	Western Africa	183183	162757	86.9455	17.105	19.2516	3.13334e+06	0.00492187	0.00553956	901.604	3.2751e-14	3.68612e-14	5.99943e-09	83.9217	14.6803	16.5227	2.68919e+06	0.00455199	0.00512326	833.848	0.000381285	0.000429135	69.8449	4.24139e-15	4.77368e-15	7.76951e-10	105.253	2.42463	2.72892	444151	0.00454058	0.00511042	831.759	6.12605e-14	6.89487e-14	1.12219e-08
MEXICO	484	Central America	15154452	7211933	18.6909	79.5679	167.196	1205808512	0.259706	0.54572	3.9357e+06	5.72298e-13	1.20257e-12	8.67287e-06	17.9783	68.5269	143.996	1038487744	0.135877	0.285519	2059143	0.218188	0.458478	3306516	4.50547e-13	9.46735e-13	6.82779e-06	23.1138	11.041	23.2005	167320800	0.041518	0.0872419	629183	6.9405e-13	1.45841e-12	1.05179e-05
MOLDOVA	498	Eastern Europe	1.12952e+06	453493	109.376	13.5972	33.8667	15358304	0.0589326	0.146784	66565.7	1.79686e-13	4.47546e-13	2.02959e-07	106.692	11.5473	28.761	13042899	0.0543875	0.135464	61431.8	0.0453584	0.112975	51233.3	3.57719e-13	8.90976e-13	4.04051e-07	124.494	2.0499	5.10572	2.31541e+06	0.0135742	0.0338096	15332.4	1.65234e-15	4.11552e-15	1.86636e-09
MONTENEGRO	499	Southern Europe	331744	123345	51.0012	29.1601	78.4276	9673675	0.5083	1.3671	168625	1.95563e-13	5.25977e-13	6.48768e-08	46.3428	26.5845	71.5004	8819239	0.720863	1.9388	239142	0.0389763	0.104829	12930.1	1.03261e-13	2.77725e-13	3.42561e-08	99.084	2.57559	6.92719	854436	0.469324	1.26227	155695	2.87865e-13	7.74229e-13	9.54975e-08
MOROCCO	504	Northern Africa	122913	257282	13.6391	109.04	52.0924	13402425	0.131605	0.0628729	16176	4.00414e-13	1.91293e-13	4.92162e-08	14.141	87.1226	41.6218	10708521	0.0681956	0.0325796	8382.14	0.107807	0.0515035	13250.9	7.68934e-13	3.67349e-13	9.45121e-08	11.6439	21.9171	10.4706	2.6939e+06	0.0237985	0.0113695	2925.15	3.1894e-14	1.5237e-14	3.9202e-09
MOZAMBIQUE	508	Eastern Africa	732129	903129	109.837	13.5401	10.9764	9913094	0.0477042	0.0386718	34925.6	2.56127e-13	2.07631e-13	1.87518e-07	97.5482	12.6296	10.2383	9246527	0.011074	0.00897719	8107.56	0.0423496	0.0343311	31005.4	2.94482e-13	2.38724e-13	2.15599e-07	280.301	0.910451	0.738064	666567	0.00535459	0.00434074	3920.25	2.17772e-13	1.76539e-13	1.59437e-07
NEPAL	524	Southern Asia	1.24936e+06	783271	31.1691	47.714	76.1061	59611728	0.653053	1.04165	815895	1.77268e-12	2.82751e-12	2.2147e-06	33.4835	36.7942	58.6886	45969104	0.262965	0.419442	328537	0.554689	0.884755	693004	1.43844e-12	2.29438e-12	1.79712e-06	23.3706	10.9197	17.4175	13642624	0.0983638	0.156895	122891	2.10691e-12	3.36063e-12	2.63228e-06
NETHERLANDS	528	Western Europe	133166	18131.3	43.0462	34.5489	253.746	4.60075e+06	0.0102387	0.0751982	1363.44	5.65153e-12	4.15078e-11	7.52592e-07	46.1983	26.6677	195.862	3.55123e+06	0.000862554	0.00633506	114.863	0.00973928	0.0715305	1296.94	1.1303e-11	8.30156e-11	1.50518e-06	32.3805	7.88128	57.8843	1049519	0.000499373	0.00366766	66.4995	1.52412e-17	1.1194e-16	2.02961e-12
NEW ZEALAND	554	Australia and New Zealand	151998	16851.2	32.3657	45.9499	414.468	6984273	0.128689	1.16077	19560.4	1.49656e-12	1.3499e-11	2.27473e-07	42.877	28.7333	259.175	4367399	0.00564983	0.0509615	858.76	0.12746	1.14969	19373.7	2.99189e-12	2.69869e-11	4.54761e-07	14.8229	17.2166	155.293	2.61687e+06	0.00122839	0.0110801	186.713	1.22331e-15	1.10342e-14	1.8594e-10
NICARAGUA	558	Central America	339140	303700	22.4156	66.3467	74.089	22500796	0.118172	0.131962	40076.8	6.11548e-14	6.82912e-14	2.074e-08	22.0614	55.8442	62.3609	18938984	0.0141542	0.0158059	4800.23	0.103664	0.115761	35156.7	5.04257e-14	5.63101e-14	1.71013e-08	24.299	10.5025	11.7281	3.56181e+06	0.0145076	0.0162006	4920.11	7.18839e-14	8.02723e-14	2.43787e-08
NIGERIA	566	Western Africa	3.72324e+06	3.63462e+06	40.7965	36.4541	37.3429	135727360	0.0569612	0.05835	212080	7.50229e-14	7.68521e-14	2.79328e-07	39.95	30.8386	31.5905	114819408	0.00722685	0.00740306	26907.3	0.0512461	0.0524956	190801	1.31219e-13	1.34418e-13	4.88558e-07	45.4454	5.61553	5.75245	20907954	0.00571513	0.00585448	21278.8	1.88271e-14	1.92862e-14	7.00979e-08
PAKISTAN	586	Southern Asia	1.43854e+06	938354	17.5156	84.9072	130.166	122141992	0.13553	0.207773	194965	1.45295e-12	2.22743e-12	2.09012e-06	17.397	70.8167	108.565	101872272	0.402357	0.616829	578804	0.0208571	0.0319748	30003.7	8.73008e-14	1.33836e-13	1.25585e-07	18.1115	14.0905	21.6013	20269720	0.114673	0.175798	164961	2.8186e-12	4.32102e-12	4.05465e-06
PANAMA	591	Central America	70178.7	55341.3	11.1161	133.788	169.658	9389084	0.604769	0.766912	42441.9	9.85161e-13	1.24929e-12	6.91373e-08	11.2747	109.271	138.568	7.66853e+06	0.0184793	0.0234338	1296.85	0.600686	0.761734	42155.3	2.46652e-13	3.12781e-13	1.73097e-08	10.4092	24.5168	31.09	1720558	0.00408372	0.0051786	286.59	1.72367e-12	2.1858e-12	1.20965e-07
PARAGUAY	600	South America	735482	358016	87.2671	17.0419	35.0097	12534043	0.0234266	0.048126	17229.9	9.91187e-14	2.03623e-13	7.29001e-08	91.5862	13.4518	27.6344	9893565	0.0143634	0.0295073	10564.1	0.0133917	0.0275109	9849.35	1.88558e-13	3.87361e-13	1.38681e-07	71.0838	3.59013	7.37531	2.64048e+06	0.0100349	0.020615	7380.51	9.67916e-15	1.98842e-14	7.11885e-09
PERU	604	South America	769428	443815	24.8716	59.7951	103.665	46008068	0.708612	1.2285	545226	7.28899e-13	1.26367e-12	5.60835e-07	23.8963	51.5562	89.3813	39668760	0.463727	0.803949	356804	0.583037	1.01079	448605	1.05607e-12	1.83088e-12	8.12571e-07	30.9747	8.23899	14.2837	6339308	0.125575	0.217706	96621.2	4.01727e-13	6.96461e-13	3.091e-07
PHILIPPINES	608	South-eastern Asia	3.72858e+06	2.40089e+06	27.7245	53.6422	83.3062	200009216	0.261691	0.406406	975737	2.65285e-12	4.11988e-12	9.89138e-06	27.0603	45.5279	70.7048	169754656	0.00962234	0.0149435	35877.7	0.256467	0.398292	956257	4.82886e-13	7.49921e-13	1.80048e-06	31.4509	8.11422	12.6014	30254554	0.00522431	0.00811334	19479.3	4.82282e-12	7.48983e-12	1.79823e-05
POLAND	616	Eastern Europe	908165	178614	52.7446	28.1963	143.364	25606860	0.117841	0.599163	107019	1.24973e-12	6.35424e-12	1.13496e-06	50.4431	24.4236	124.182	22180626	0.022738	0.115611	20649.8	0.115826	0.58892	105189	2.49937e-12	1.27081e-11	2.26984e-06	67.6439	3.7727	19.1823	3426233	0.00201445	0.0102425	1829.45	7.98966e-17	4.06235e-16	7.25593e-11
PORTUGAL	620	Southern Europe	767228	152500	40.2412	36.9571	185.931	28354528	0.283935	1.42847	217843	1.68019e-12	8.45303e-12	1.28909e-06	40.1383	30.6939	154.421	23549210	0.070873	0.356562	54375.7	0.273409	1.37552	209767	3.34964e-12	1.6852e-11	2.56994e-06	40.7458	6.26322	31.5102	4805319	0.0105254	0.0529531	8075.36	1.07398e-14	5.4032e-14	8.23989e-09
TIMOR-LESTE	626	South-eastern Asia	72392.2	50253.8	17.605	84.4761	121.69	6115407	0.455387	0.656	32966.5	1.33951e-13	1.92961e-13	9.69703e-09	16.8703	73.0276	105.199	5286627	0.00372334	0.00536359	269.541	0.454599	0.654865	32909.4	2.63436e-13	3.79488e-13	1.90707e-08	22.2912	11.4485	16.4919	828780	0.000787854	0.00113493	57.0345	4.46697e-15	6.43482e-15	3.23374e-10
ROMANIA	642	Eastern Europe	7.92883e+06	2964473	63.3276	23.4842	62.8114	186202592	0.0409375	0.109492	324586	2.31627e-13	6.19514e-13	1.83653e-06	60.4879	20.3677	54.4758	161492000	0.024603	0.0658036	195073	0.034334	0.0918304	272229	4.62585e-13	1.23724e-12	3.66776e-06	81.8854	3.11655	8.33558	24710598	0.00660343	0.0176616	52357.4	6.68948e-16	1.78918e-15	5.30398e-09
RUSSIA	643	Eastern Europe	1.32722e+06	609394	136.376	10.9051	23.7507	14473552	0.0367439	0.0800259	48767.3	1.25802e-13	2.73988e-13	1.66967e-07	122.711	10.0399	21.8662	13325128	0.0552561	0.120344	73337.2	0.0204502	0.0445392	27142	2.50139e-13	5.44787e-13	3.3199e-07	294.932	0.865284	1.88453	1.14842e+06	0.0162937	0.0354866	21625.4	1.46427e-15	3.18908e-15	1.94341e-09
SENEGAL	686	Western Africa	74658.1	72668	29.1445	51.0285	52.426	3809691	0.0306981	0.0315388	2291.86	8.56107e-13	8.79552e-13	6.39153e-08	28.6754	42.9636	44.1402	3.20758e+06	0.0055011	0.00565176	410.702	0.0292477	0.0300486	2183.57	1.7116e-12	1.75847e-12	1.27785e-07	31.6432	8.06492	8.28579	602112	0.00145048	0.0014902	108.29	6.1529e-16	6.32141e-16	4.59364e-11
SERBIA	688	Southern Europe	4262767	1.14292e+06	64.2083	23.1621	86.3882	98734736	0.0747491	0.278793	318638	1.9999e-13	7.45905e-13	8.5251e-07	59.4749	20.7146	77.2596	88301552	0.100002	0.372981	426287	0.0513962	0.191693	219090	3.84625e-13	1.43454e-12	1.63957e-06	104.269	2.44751	9.12854	10433184	0.023353	0.0871	99548.3	1.53541e-14	5.72666e-14	6.54512e-08
SLOVAKIA	703	Eastern Europe	594187	134320	60.3937	24.6251	108.933	14631914	0.0497353	0.220012	29552	2.28444e-13	1.01056e-12	1.35739e-07	55.0977	22.3603	98.9143	13286196	0.0329099	0.145582	19554.7	0.044648	0.197508	26529.3	4.55467e-13	2.01483e-12	2.70632e-07	112.681	2.26481	10.0187	1345718	0.00508723	0.0225042	3022.77	1.42227e-15	6.29162e-15	8.45093e-10
VIET NAM	704	South-eastern Asia	1579730	651432	19.0382	78.1167	189.434	123403312	0.706392	1.71301	1.11591e+06	3.81859e-12	9.26012e-12	6.03234e-06	20.0831	61.3451	148.762	96908632	0.114979	0.278824	181635	0.680901	1.65119	1075639	7.40429e-12	1.79555e-11	1.16968e-05	15.2162	16.7717	40.6714	26494682	0.0254918	0.0618179	40270.1	2.32886e-13	5.64751e-13	3.67897e-07
SLOVENIA	705	Southern Europe	267274	45915.8	24.3924	60.9699	354.904	16295688	0.415331	2.41763	111007	1.29808e-12	7.55607e-12	3.46943e-07	24.24	50.825	295.851	13584230	0.236666	1.37763	63254.8	0.409644	2.38453	109487	2.5954e-12	1.51078e-11	6.93685e-07	25.1556	10.1448	59.0528	2.71146e+06	0.00568636	0.0331001	1519.82	7.53538e-16	4.38632e-15	2.01401e-10
SOMALIA	706	Eastern Africa	199035	176447	59.1627	25.1375	28.3555	5003237	0.00153269	0.0017289	305.059	5.97256e-15	6.73716e-15	1.18875e-09	59.5091	20.7027	23.353	4.12057e+06	0.000245825	0.000277295	48.9277	0.00119263	0.00134531	237.376	1.19287e-14	1.34558e-14	2.37424e-09	57.5458	4.43472	5.00245	882666	0.000340059	0.000383593	67.6837	1.63866e-17	1.84844e-17	3.26151e-12
SOUTH AFRICA	710	Southern Africa	6761777	3.02404e+06	31.2462	47.5963	106.426	321835264	0.0416983	0.0932378	281954	1.23778e-13	2.76769e-13	8.36959e-07	30.0898	40.9441	91.5515	276855104	0.0624689	0.139681	422401	0.0346753	0.0775344	234467	2.17354e-13	4.86005e-13	1.4697e-06	38.3637	6.65212	14.8742	44980156	0.00702295	0.0157034	47487.6	3.02022e-14	6.75324e-14	2.04221e-07
ZIMBABWE	716	Eastern Africa	910620	1.0527e+06	18.9203	78.6035	67.9946	71577880	0.176581	0.152749	160798	3.70395e-13	3.20404e-13	3.37289e-07	18.2797	67.3973	58.3009	61373284	0.169055	0.146238	153945	0.147632	0.127707	134437	4.97595e-13	4.30437e-13	4.5312e-07	22.7731	11.2062	9.69375	10204594	0.028949	0.0250418	26361.5	2.43194e-13	2.10371e-13	2.21457e-07
SPAIN	724	Southern Europe	3.79941e+06	457947	39.2614	37.8794	314.271	143919616	0.102596	0.8512	389805	6.94878e-13	5.76514e-12	2.64013e-06	39.8084	30.9482	256.765	117585080	0.171314	1.42132	650892	0.0882588	0.732249	335331	1.32903e-12	1.10264e-11	5.04953e-06	36.819	6.93121	57.5056	26334530	0.0143374	0.118951	54473.5	6.07284e-14	5.0384e-13	2.30732e-07
SWAZILAND	748	Southern Africa	89410.8	71587	37.6188	39.5334	49.3765	3534712	0.251965	0.3147	22528.4	1.40353e-13	1.75299e-13	1.25491e-08	38.3602	32.1166	40.113	2.87157e+06	0.0294163	0.0367404	2630.13	0.242982	0.303481	21725.3	2.38379e-13	2.97732e-13	2.13137e-08	34.4084	7.41679	9.26344	663141	0.00898246	0.0112189	803.129	4.23275e-14	5.28662e-14	3.78453e-09
SWITZERLAND	756	Western Europe	160895	20950.3	48.954	30.3795	233.31	4887922	0.208147	1.59853	33489.8	5.58719e-13	4.29087e-12	8.98952e-08	46.8342	26.3056	202.023	4232442	0.150338	1.15458	24188.7	0.172654	1.32596	27779.2	1.11312e-12	8.54861e-12	1.79096e-07	62.6418	4.07395	31.2874	655480	0.0354928	0.272579	5710.62	4.31523e-15	3.31403e-14	6.94299e-10
SYRIA	760	Western Asia	198410	60233.3	75.0141	19.8256	65.306	3933598	0.016203	0.0533731	3214.84	8.43415e-14	2.77823e-13	1.67342e-08	72.654	16.9571	55.8571	3364456	0.0288634	0.0950768	5726.79	0.0140798	0.0463791	2793.57	7.40041e-14	2.43771e-13	1.46831e-08	88.9659	2.86851	9.44896	569142	0.00212322	0.00699394	421.268	9.4679e-14	3.11875e-13	1.87852e-08
THAILAND	764	South-eastern Asia	3.74634e+06	1189345	55.1513	26.9658	84.9402	101023248	0.0255511	0.080484	95723.3	2.45142e-13	7.72177e-13	9.18385e-07	55.1896	22.323	70.3158	83629808	0.0138951	0.0437686	52056	0.0195577	0.0616051	73269.8	3.92607e-13	1.23668e-12	1.47084e-06	54.9671	4.64278	14.6244	17393442	0.00599344	0.0188789	22453.5	9.7676e-14	3.07672e-13	3.65928e-07
TOGO	768	Western Africa	381607	380750	49.2976	30.1678	30.2356	11512234	0.0395909	0.0396799	15108.1	2.41304e-13	2.41847e-13	9.20832e-08	48.7575	25.2679	25.3247	9642401	0.0125475	0.0125757	4788.21	0.0324023	0.0324752	12364.9	1.50002e-13	1.5034e-13	5.72419e-08	52.0827	4.8999	4.91092	1.86983e+06	0.00718854	0.0072047	2743.19	3.32606e-13	3.33354e-13	1.26925e-07
TURKEY	792	Western Asia	1.92263e+06	514304	24.9056	59.7134	223.227	114806448	0.389385	1.45564	748642	1.16068e-12	4.33896e-12	2.23154e-06	23.2424	53.0065	198.154	101911576	0.314531	1.17581	604725	0.330776	1.23654	635958	1.60913e-12	6.0154e-12	3.09375e-06	38.0503	6.70691	25.0724	12894870	0.0586097	0.219101	112684	7.12224e-13	2.66251e-12	1.36934e-06
UGANDA	800	Eastern Africa	861042	594381	52.0892	28.551	41.36	24583602	0.0135771	0.0196683	11690.5	1.62286e-15	2.35094e-15	1.39735e-09	52.5044	23.4647	33.9918	20204084	0.0225951	0.032732	19455.3	0.000134066	0.000194213	115.437	2.96605e-16	4.29673e-16	2.5539e-10	50.174	5.0863	7.3682	4.37952e+06	0.0134431	0.0194741	11575	2.94912e-15	4.2722e-15	2.53931e-09
UKRAINE	804	Eastern Europe	3390188	1.25295e+06	89.9487	16.5339	44.7366	56052920	0.0308706	0.0835282	104657	1.86296e-13	5.04072e-13	6.31579e-07	83.2323	14.8019	40.0505	50181388	0.0245582	0.0664485	83256.9	0.0246878	0.0667993	83696.4	3.72234e-13	1.00718e-12	1.26194e-06	147.351	1.73192	4.68615	5871533	0.00618272	0.016729	20960.6	3.57984e-16	9.68619e-16	1.21363e-09
MACEDONIA	807	Southern Europe	120320	34039.7	60.8477	24.4414	86.3924	2.94077e+06	0.0901956	0.318812	10852.3	1.2824e-13	4.53286e-13	1.54297e-08	58.5156	21.0542	74.4199	2.53323e+06	0.207299	0.732734	24942.1	0.0307109	0.108553	3695.12	1.02436e-13	3.62079e-13	1.23251e-08	75.3436	3.38715	11.9725	407540	0.0594847	0.210259	7157.17	1.54043e-13	5.44492e-13	1.85344e-08
EGYPT	818	Northern Africa	5.27873e+06	804526	23.6806	62.8025	412.065	331517408	0.000991824	0.00650765	5235.57	6.21461e-15	4.07759e-14	3.28052e-08	20.5496	59.9525	393.366	316473056	0.000498161	0.00326858	2629.66	0.000828283	0.00543461	4372.28	9.28986e-15	6.09535e-14	4.90386e-08	89.544	2.84999	18.6996	15044354	0.00016354	0.00107304	863.286	3.13936e-15	2.05983e-14	1.65718e-08
TANZANIA	834	Eastern Africa	1.8685e+06	1.3819e+06	96.687	15.3816	20.7978	28740496	0.0256799	0.0347224	47982.8	3.63281e-13	4.91201e-13	6.78791e-07	93.896	13.1209	17.7411	24516404	0.00677542	0.00916122	12659.9	0.0102247	0.0138251	19104.9	1.84745e-13	2.49798e-13	3.45196e-07	112.886	2.26069	3.05673	4224093	0.0154551	0.0208973	28877.9	5.41817e-13	7.32604e-13	1.01239e-06
USA	840	Northern America	215503216	29005134	51.3635	28.9544	215.126	6239767552	0.0678356	0.504007	14618781	1.75942e-13	1.30722e-12	3.79161e-05	47.9605	25.6878	190.856	5535810048	0.0562568	0.417978	12123513	0.0662464	0.492199	14276308	3.48282e-13	2.58767e-12	7.50558e-05	78.1246	3.26658	24.2701	703957696	0.00158918	0.0118073	342473	3.60249e-15	2.67659e-14	7.76349e-07
BURKINA FASO	854	Western Africa	313135	223858	53.9117	27.5858	38.5874	8638088	0.00309269	0.0043261	968.43	8.44294e-16	1.18101e-15	2.64378e-10	54.2916	22.6923	31.7423	7105749	0.00332045	0.00464468	1039.75	0.000354223	0.000495491	110.919	7.60953e-16	1.06443e-15	2.38281e-10	52.1504	4.89354	6.84515	1.53234e+06	0.00273847	0.00383061	857.51	9.27635e-16	1.29759e-15	2.90475e-10
URUGUAY	858	South America	159154	52454.2	54.1636	27.4576	83.3102	4369974	0.0307957	0.0934385	4901.25	5.12491e-13	1.55497e-12	8.15649e-08	59.9374	20.5548	62.3661	3.27137e+06	0.00453184	0.0137503	721.26	0.0284502	0.0863219	4527.95	1.01933e-12	3.09279e-12	1.6223e-07	36.9705	6.9028	20.9441	1.09861e+06	0.00234551	0.00711662	373.297	5.65367e-15	1.71541e-14	8.99803e-10
UZBEKISTAN	860	Central Asia	123917	41760.4	33.1048	44.924	133.304	5566837	0.0145364	0.0431344	1801.31	1.64286e-15	4.87493e-15	2.03579e-10	29.0159	42.4594	125.991	5261436	0.148251	0.439909	18370.7	0	0	0	0	0	0	103.548	2.46457	7.31319	305401	0.0145364	0.0431344	1801.31	3.28573e-15	9.74985e-15	4.07157e-10
VENEZUELA (BOLIVARIAN REPUBLIC OF)	862	South America	1.01634e+06	445198	20.6831	71.9041	164.149	73078760	0.0933603	0.213131	94885.6	9.92617e-13	2.26603e-12	1.00883e-06	19.8379	62.1034	141.775	63117948	0.0892021	0.203638	90659.4	0.0825174	0.188378	83865.5	3.02734e-13	6.91108e-13	3.0768e-07	26.0389	9.8007	22.3739	9960815	0.0108429	0.0247532	11020.1	1.6825e-12	3.84095e-12	1.70999e-06
ZAMBIA	894	Eastern Africa	661568	521253	48.2987	30.7917	39.0804	20370788	0.0307515	0.0390293	20344.2	5.08178e-14	6.44973e-14	3.36194e-08	46.1115	26.7179	33.9099	17675666	0.0606165	0.0769336	40101.9	0.0117778	0.0149483	7791.84	5.49773e-14	6.97764e-14	3.63712e-08	62.6436	4.07384	5.17046	2695121	0.0189736	0.024081	12552.3	4.66583e-14	5.92181e-14	3.08676e-08

## Sheet: Millet_Country_Level
Country	Country	Sub Region	Dry Production	Crop Area	Nutrient Use Efficiency	Fertiliser Input N&P			Nutrient Loading (N&P) to Aquatic Receptors			Aquatic Species Richness Impact Freshwater and Marine Combined			Nutrient Use Efficiency	N Input			N Load Freshwater			N Load Marine			N Marine Demersal Species Richness impact			Nutrient Use Efficiency	P Input			P Load Freshwater			P Freshwater Fish Species Richness impact
Name	Code		per country	per country		Per Tonne Crop	Per Hectare	Total	Per Tonne Crop	Per Hectare	Total	Per Tonne Crop	Per Hectare	Total	Nitrogen	Per Tonne Crop	Per Hectare	Total	Per Tonne Crop	Per Hectare	Total	Per Tonne Crop	Per Hectare	Total	Per Tonne Crop	Per Hectare	Total	Phopshours	Per Tonne Crop	Per Hectare	Total	Per Tonne Crop	Per Hectare	Total	Per Tonne Crop	Per Hectare	Total
			Tonne	ha	%	kg/tonne crop	kg/ha	kg	kg/tonne crop	kg/ha	kg	PDF.yr/tonne crop	PDF.yr/ha	PDF.yr	%	kg/tonne crop	kg/ha	kg	kg/tonne crop	kg/ha	kg	kg/tonne crop	kg/ha	kg	PDF.yr/tonne crop	PDF.yr/ha	PDF.yr	%	kg/tonne crop	kg/ha	kg	kg/tonne crop	kg/ha	kg	PDF.yr/tonne crop	PDF.yr/ha	PDF.yr
AFGHANISTAN	4	Southern Asia	18654.1	27094	162.92	9.39111	6.46575	175183	0.0955035	0.0657538	1781.53	3.16011e-13	2.17573e-13	5.89492e-09	135.877	9.38351	6.46051	175041	0.273158	0.188068	5095.52	0.00887654	0.00611147	165.584	3.86786e-14	2.66301e-14	7.21516e-10	33552.7	0.00759998	0.00523256	141.771	0.0866269	0.0596423	1615.95	5.93344e-13	4.08515e-13	1.10683e-08
ANGOLA	24	Middle Africa	91509.9	219536	64.793	23.6137	9.84297	2.16089e+06	0.0824797	0.0343803	7547.71	3.45046e-13	1.43827e-13	3.15752e-08	55.5791	22.9403	9.56228	2.09926e+06	0.0213099	0.0088827	1950.07	0.0737778	0.0307531	6751.4	6.48584e-13	2.70352e-13	5.93519e-08	378.678	0.673395	0.280694	61622.4	0.00870186	0.00362723	796.307	4.15087e-14	1.73022e-14	3.79846e-09
ARGENTINA	32	South America	35397.6	26482	48.9315	31.2682	41.7952	1.10682e+06	0.059779	0.0799046	2116.03	2.14357e-13	2.86524e-13	7.58774e-09	50.1544	25.4215	33.9801	899861	0.0139666	0.0186687	494.385	0.0577372	0.0771753	2043.76	4.25462e-13	5.68701e-13	1.50603e-08	43.6143	5.84671	7.81511	206960	0.00204183	0.00272924	72.2758	3.25252e-15	4.34754e-15	1.15132e-10
AUSTRALIA	36	Australia and New Zealand	38961.1	34033.8	29.0333	52.6981	60.3276	2.05318e+06	0.0246796	0.0282526	961.544	5.74536e-14	6.57716e-14	2.23846e-09	31.3989	40.6065	46.4854	1.58207e+06	0.0187076	0.021416	728.868	0.0206833	0.0236778	805.846	9.98009e-14	1.1425e-13	3.88836e-09	21.0891	12.0916	13.8422	471101	0.00399622	0.00457479	155.697	1.51063e-14	1.72933e-14	5.88557e-10
BANGLADESH	50	Southern Asia	29699	50439.4	59.4312	25.7441	15.1582	764573	0.0880134	0.0518228	2613.91	1.13343e-12	6.67373e-13	3.36619e-08	53.4149	23.8697	14.0546	708907	0.00935354	0.00550742	277.791	0.0842923	0.0496318	2503.4	2.1968e-12	1.29349e-12	6.52428e-08	136.048	1.87433	1.10362	55665.9	0.00372108	0.00219099	110.512	7.00688e-14	4.12569e-14	2.08097e-09
BHUTAN	64	Southern Asia	3982.41	6269.3	15.9961	95.6486	60.7583	380912	2.3866	1.51602	9504.4	3.44183e-12	2.18633e-12	1.37068e-08	16.7086	76.3081	48.4727	303890	0.351622	0.223359	1400.3	2.24935	1.42884	8957.84	5.37171e-12	3.41224e-12	2.13923e-08	13.1848	19.3405	12.2855	77021.7	0.137243	0.0871801	546.558	1.51195e-12	9.60426e-13	6.02119e-09
BULGARIA	100	Eastern Europe	3237.56	3808.89	7.90419	193.568	164.533	626688	1.10455	0.938867	3576.04	2.61678e-12	2.22426e-12	8.47196e-09	7.65505	166.557	141.573	539237	0.884643	0.751947	2864.08	1.04346	0.886942	3378.26	5.15217e-12	4.37934e-12	1.66804e-08	9.44043	27.0115	22.9598	87451.2	0.0610877	0.0519246	197.775	8.13846e-14	6.91769e-14	2.63487e-10
MYANMAR	104	South-eastern Asia	141571	239092	30.582	50.0294	29.6233	7082685	0.318145	0.188379	45040	3.37195e-12	1.99659e-12	4.77369e-07	30.9897	41.1427	24.3613	5824593	0.0574	0.0339876	8126.15	0.294875	0.174601	41745.6	1.50265e-12	8.89744e-13	2.1273e-07	28.6946	8.88668	5.26196	1.25809e+06	0.0232702	0.0137787	3294.37	5.24125e-12	3.10344e-12	7.42007e-07
BURUNDI	108	Eastern Africa	9293.52	9286.03	113.479	13.4827	13.4935	125301	0.0720236	0.0720817	669.353	1.29733e-13	1.29838e-13	1.20568e-09	106.283	11.9963	12.006	111488	0.0355321	0.0355608	330.219	0	0	0	0	0	0	171.559	1.48637	1.48756	13813.6	0.0720236	0.0720817	669.353	2.59467e-13	2.59676e-13	2.41136e-09
CAMEROON	120	Middle Africa	46293.9	54292.6	64.9251	23.5656	20.0938	1090944	0.106445	0.0907627	4927.75	1.69296e-13	1.44355e-13	7.83739e-09	61.2797	20.8062	17.7409	963202	0.0315993	0.0269439	1462.86	0.0915655	0.0780755	4238.92	3.21132e-13	2.73821e-13	1.48665e-08	92.4124	2.75937	2.35284	127742	0.0148794	0.0126872	688.823	1.74602e-14	1.48879e-14	8.08301e-10
CENTRAL AFRICAN REPUBLIC	140	Middle Africa	8529.77	10955.2	72.1784	21.1975	16.5045	180809	0.0127295	0.00991125	108.58	9.66554e-15	7.52565e-15	8.24448e-11	67.2883	18.9483	14.7533	161625	0.0154963	0.0120655	132.18	0.00541608	0.00421699	46.1979	1.9001e-14	1.47943e-14	1.62074e-10	113.377	2.24913	1.75119	19184.6	0.0073134	0.00569426	62.3816	3.30077e-16	2.57e-16	2.81548e-12
SRI LANKA	144	Southern Asia	4301.46	6244.01	19.1645	79.8353	54.9981	343409	0.387463	0.266921	1666.66	3.43197e-11	2.36426e-11	1.47625e-07	20.6967	61.6041	42.4387	264988	0.24536	0.169027	1055.41	0.281011	0.193587	1208.76	1.97487e-13	1.36047e-13	8.49482e-10	13.987	18.2312	12.5594	78420.8	0.106452	0.0733342	457.899	6.84419e-11	4.71492e-11	2.944e-07
CHAD	148	Middle Africa	237938	630002	19.5928	78.0897	29.4928	18580510	0.00161127	0.00060854	383.382	2.14028e-16	8.08335e-17	5.09253e-11	19.6853	64.7693	24.4619	15411072	0.00201476	0.000760932	479.389	0.000120027	4.53317e-05	28.5591	4.03346e-16	1.52335e-16	9.59713e-11	19.1435	13.3204	5.03084	3.16944e+06	0.00149124	0.000563209	354.823	2.47092e-17	9.33213e-18	5.87926e-12
CHINA	156	Eastern Asia	1.88766e+06	1219594	18.8612	81.119	125.554	153124752	0.149002	0.230621	281264	1.6978e-12	2.62781e-12	3.20487e-06	18.1819	70.1247	108.537	132371416	0.440221	0.681363	830986	0.105203	0.16283	198586	3.37084e-12	5.2173e-12	6.36298e-06	23.194	10.9942	17.0166	20753338	0.0437992	0.0677913	82677.8	2.47661e-14	3.83323e-14	4.67498e-08
CONGO D.C	180	Middle Africa	28214.9	50842.2	87.5351	17.4787	9.69982	493160	0.108273	0.060086	3054.91	2.0911e-13	1.16046e-13	5.90002e-09	75.5012	16.8871	9.37153	476470	0.0254947	0.0141483	719.331	0.0976699	0.054202	2755.75	3.8955e-13	2.16181e-13	1.09911e-08	431.066	0.591557	0.328285	16690.7	0.0106027	0.005884	299.156	2.86692e-14	1.591e-14	8.08901e-10
BENIN	204	Western Africa	23778.6	35797.3	18.3378	83.4341	55.4218	1.98395e+06	0.0249859	0.0165971	594.132	3.47679e-14	2.30949e-14	8.26734e-10	18.7984	67.825	45.0533	1612787	0.00805475	0.00535044	191.531	0.0184943	0.012285	439.77	6.24517e-14	4.1484e-14	1.48502e-09	16.3366	15.6091	10.3685	371164	0.00649162	0.00431211	154.362	7.08417e-15	4.70572e-15	1.68452e-10
ETHIOPIA	231	Eastern Africa	161922	182146	17.7062	86.4106	76.8162	13991742	0.103581	0.0920797	16771.9	3.94295e-13	3.50515e-13	6.38449e-08	18.3749	69.3883	61.6839	11235467	0.109927	0.0977214	17799.5	0.0182112	0.0161891	2948.78	1.18756e-13	1.0557e-13	1.92292e-08	14.9804	17.0223	15.1322	2.75627e+06	0.0853694	0.0758906	13823.1	6.69834e-13	5.9546e-13	1.08461e-07
ERITREA	232	Eastern Africa	11176.7	51864.4	11.0443	138.533	29.8537	1.54835e+06	0.21343	0.0459939	2385.45	4.56028e-13	9.82736e-14	5.0969e-09	11.0966	114.9	24.7608	1.2842e+06	0.0661347	0.014252	739.17	0.159674	0.0344097	1784.64	8.96517e-13	1.93199e-13	1.00201e-08	10.7899	23.6332	5.09293	264142	0.0537556	0.0115843	600.812	1.55386e-14	3.34856e-15	1.73671e-10
FRANCE	250	Western Europe	2572.85	1240.53	40.3133	37.9527	78.714	97646.9	0.16214	0.336277	417.161	1.44028e-12	2.98715e-12	3.70564e-09	38.9753	32.713	67.8467	84165.7	0.0454334	0.0942289	116.894	0.154623	0.320689	397.823	2.8608e-12	5.9333e-12	7.36043e-09	48.6663	5.23976	10.8673	13481.1	0.0075162	0.0155886	19.3381	1.97635e-14	4.09895e-14	5.08486e-11
GAMBIA	270	Western Africa	63582.9	72380.5	37.7039	40.5793	35.647	2.58015e+06	0.0489224	0.042976	3110.63	1.1233e-12	9.86766e-13	7.14226e-08	38.0081	33.5455	29.4681	2132917	0.00470381	0.00413208	299.082	0.0468001	0.0411117	2975.68	2.24562e-12	1.97267e-12	1.42783e-07	36.2532	7.03387	6.17893	447234	0.00212232	0.00186436	134.943	9.76263e-16	8.57601e-16	6.20736e-11
GHANA	288	Western Africa	99627.4	137791	52.9386	28.9014	20.8967	2.87937e+06	0.0166023	0.012004	1654.05	6.07813e-15	4.39468e-15	6.05548e-10	51.3131	24.8475	17.9655	2.47549e+06	0.026962	0.0194944	2686.15	0.00159049	0.00114997	158.456	5.8613e-15	4.23791e-15	5.83946e-10	62.9016	4.05395	2.93114	403885	0.0150118	0.010854	1495.59	6.29495e-15	4.55146e-15	6.2715e-10
GUINEA	324	Western Africa	7459.45	10241.3	124.556	12.2837	8.94701	91629.4	0.122435	0.0891779	913.301	1.45184e-12	1.05747e-12	1.083e-08	107.532	11.8569	8.63616	88445.8	0.0277236	0.0201929	206.803	0.101262	0.0737561	755.362	5.02081e-13	3.65699e-13	3.74525e-09	597.498	0.426779	0.310852	3183.54	0.0211731	0.0154218	157.94	2.40161e-12	1.74925e-12	1.79147e-08
HUNGARY	348	Eastern Europe	8749.75	7798.51	29.5219	51.8259	58.1475	453464	0.25583	0.287036	2238.45	1.08204e-12	1.21403e-12	9.4676e-09	27.922	45.663	51.2328	399540	0.13895	0.155899	1215.78	0.247695	0.277909	2167.27	2.16211e-12	2.42584e-12	1.89179e-08	41.3763	6.16295	6.91469	53924.3	0.00813481	0.00912707	71.1776	1.97357e-15	2.2143e-15	1.72683e-11
INDIA	356	Southern Asia	8.26987e+06	12142185	16.9558	90.2345	61.4574	746227456	0.0527469	0.0359252	436210	3.22553e-13	2.19686e-13	2.66747e-06	17.8561	71.4041	48.6323	590502336	0.0575509	0.0391971	475938	0.0247226	0.0168382	204453	1.24729e-13	8.49508e-14	1.03149e-06	13.5419	18.8304	12.8251	155725120	0.0280243	0.019087	231757	5.20377e-13	3.54422e-13	4.30345e-06
IRAN	364	Southern Asia	8773.85	11009.5	12.8911	118.687	94.5858	1.04134e+06	0.393417	0.313529	3451.78	5.54812e-13	4.4215e-13	4.86784e-09	11.8555	107.545	85.7063	943580	0.565592	0.450741	4962.42	0.230017	0.183309	2018.14	3.40223e-13	2.71137e-13	2.98507e-09	22.8864	11.142	8.87946	97758.1	0.1634	0.13022	1433.65	7.69401e-13	6.13164e-13	6.75061e-09
COTE D'IVOIRE	384	Western Africa	54648.8	87017.8	49.0289	31.2061	19.598	1.70538e+06	0.0274301	0.0172266	1499.02	7.19462e-15	4.51835e-15	3.93177e-10	46.4468	27.4508	17.2396	1.50015e+06	0.0230427	0.0144713	1259.26	0.006013	0.00377628	328.603	9.20746e-15	5.78246e-15	5.03177e-10	67.9035	3.75533	2.35842	205224	0.0214171	0.0134503	1170.42	5.18177e-15	3.25425e-15	2.83178e-10
KAZAKHSTAN	398	Central Asia	39011.2	77582.4	62.9904	24.2894	12.2136	947559	0.0547511	0.0275308	2135.91	8.76874e-14	4.40924e-14	3.42079e-09	56.4241	22.5967	11.3624	881526	0.0398536	0.0200398	1554.74	0.0453705	0.0228139	1769.96	1.70835e-13	8.59018e-14	6.66447e-09	150.649	1.69267	0.851137	66033.3	0.00938059	0.0047169	365.948	4.53998e-15	2.28286e-15	1.7711e-10
KENYA	404	Eastern Africa	47442.6	95762.9	24.687	61.976	30.704	2.9403e+06	0.0513028	0.0254163	2433.94	2.56448e-13	1.27049e-13	1.21666e-08	24.6449	51.7348	25.6303	2.45443e+06	0.0616826	0.0305586	2926.38	0.0132135	0.0065462	626.883	1.51112e-13	7.48633e-14	7.16912e-09	24.8995	10.2412	5.07365	485867	0.0380893	0.0188701	1807.05	3.61785e-13	1.79234e-13	1.7164e-08
N. KOREA	408	Eastern Asia	28354.7	32216.6	49.3888	30.9787	27.2652	878391	0.746171	0.656725	21157.4	1.27815e-11	1.12494e-11	3.62417e-07	46.898	27.1866	23.9277	770869	0.579781	0.510281	16439.5	0.516683	0.454747	14650.4	2.54884e-11	2.2433e-11	7.22716e-07	67.246	3.79205	3.33748	107522	0.229488	0.201978	6507.05	7.46854e-14	6.57326e-14	2.11768e-09
LIBYA	434	Northern Africa	4666.1	4773.51	20.816	73.5012	71.8474	342964	0.018531	0.0181141	86.4678	1.20299e-14	1.17592e-14	5.61328e-11	22.0471	57.8307	56.5295	269844	0.00626081	0.00611994	29.2136	0.0182409	0.0178304	85.1137	2.39964e-14	2.34565e-14	1.1197e-10	16.2727	15.6704	15.3179	73120	0.000290186	0.000283657	1.35404	6.34305e-17	6.20033e-17	2.95973e-13
MALAWI	454	Eastern Africa	8302.29	16449.1	43.6755	35.0311	17.6811	290838	0.093048	0.0469638	772.512	1.09294e-12	5.51638e-13	9.07394e-09	41.1321	30.9977	15.6453	257352	0.0133857	0.0067561	111.132	0.0584204	0.0294863	485.023	1.63056e-12	8.22988e-13	1.35374e-08	63.222	4.03341	2.03577	33486.5	0.0346276	0.0174775	287.489	5.55326e-13	2.80288e-13	4.61048e-09
MALI	466	Western Africa	519443	864247	24.0568	63.5994	38.2256	33036308	0.00478022	0.00287309	2483.06	4.89151e-14	2.93997e-14	2.54086e-08	24.6105	51.8071	31.138	26910880	0.00403451	0.00242489	2095.7	0.000731319	0.000439549	379.879	2.60771e-15	1.56733e-15	1.35456e-09	21.6243	11.7923	7.08759	6125429	0.00404891	0.00243354	2103.18	9.52225e-14	5.72322e-14	4.94627e-08
MAURITANIA	478	Western Africa	2213.46	12407.8	28.3082	54.048	9.64176	119633	0.0197003	0.00351439	43.6059	3.39439e-14	6.05534e-15	7.51335e-11	25.7201	49.5721	8.84329	109726	0.00537115	0.000958173	11.8888	0.0161168	0.00287511	35.6739	6.35291e-14	1.13331e-14	1.40619e-10	56.9717	4.47591	0.798468	9907.24	0.00358354	0.000639277	7.93203	4.35875e-15	7.77568e-16	9.64792e-12
MOROCCO	504	Northern Africa	6480.56	5369.15	79.0394	19.3574	23.3644	125447	0.0845661	0.102071	548.036	1.82048e-13	2.19731e-13	1.17977e-09	81.0028	15.7402	18.9984	102005	0.223018	0.269183	1445.28	0.0130479	0.0157488	84.5576	2.19111e-13	2.64468e-13	1.41997e-09	70.4958	3.61723	4.366	23441.7	0.0715182	0.0863225	463.479	1.44984e-13	1.74995e-13	9.39577e-10
MOZAMBIQUE	508	Eastern Africa	42503.6	90212.2	93.8091	16.3097	7.68434	693222	0.0760039	0.0358093	3230.44	2.66243e-13	1.25441e-13	1.13163e-08	80.026	15.9323	7.50654	677182	0.0153659	0.00723964	653.104	0.0643438	0.0303157	2734.84	2.75641e-13	1.29869e-13	1.17157e-08	675.712	0.37738	0.177803	16040	0.0116601	0.00549365	495.594	2.56845e-13	1.21013e-13	1.09168e-08
NAMIBIA	516	Southern Africa	22068	105655	5.03489	303.88	63.4707	6706018	0.00273015	0.00057024	60.249	4.9052e-14	1.02454e-14	1.08248e-09	5.17558	246.349	51.4544	5436434	0.00238758	0.000498689	52.6891	0.00137974	0.000288183	30.4481	3.56096e-15	7.43771e-16	7.85834e-11	4.43243	57.5305	12.0163	1.26958e+06	0.00135041	0.000282057	29.8008	9.4543e-14	1.9747e-14	2.08638e-09
NEPAL	524	Southern Asia	226336	246941	20.9114	73.1659	67.0609	16560095	1.47721	1.35395	334346	3.66345e-12	3.35778e-12	8.29173e-07	23.1627	55.0453	50.4523	12458745	0.583612	0.534915	132093	1.25176	1.14731	283318	3.06676e-12	2.81087e-12	6.94118e-07	14.0724	18.1206	16.6086	4101350	0.225454	0.206642	51028.5	4.26015e-12	3.90468e-12	9.64227e-07
NIGER	562	Western Africa	1.56968e+06	4.66928e+06	34.6732	44.1263	14.834	69264176	0.00135955	0.000457041	2134.05	9.85648e-16	3.31347e-16	1.54715e-09	33.0038	38.6319	12.9869	60639640	0.000740081	0.000248794	1161.69	0.000524351	0.000176272	823.063	1.96327e-15	6.59995e-16	3.0817e-09	46.4104	5.49446	1.84708	8624534	0.000835197	0.000280769	1310.99	8.02734e-18	2.69856e-18	1.26003e-11
NIGERIA	566	Western Africa	4.09297e+06	4.64859e+06	36.274	42.179	37.1375	172637216	0.0136013	0.0119756	55669.8	1.48831e-14	1.31042e-14	6.09162e-08	36.6282	34.8093	30.6487	142473248	0.00456098	0.00401582	18667.9	0.00861305	0.00758357	35252.9	2.59817e-14	2.28762e-14	1.06342e-07	34.6011	7.36971	6.48884	30163974	0.00498828	0.00439205	20416.9	3.78456e-15	3.33221e-15	1.54901e-08
PAKISTAN	586	Southern Asia	171867	409964	8.0371	190.367	79.8069	32717912	0.0281121	0.0117853	4831.56	1.87982e-13	7.88068e-14	3.23079e-08	8.59403	148.359	62.1958	25498034	0.0883224	0.037027	15179.7	0.00584833	0.00245177	1005.14	4.34076e-14	1.81976e-14	7.46036e-09	6.07021	42.0084	17.611	7219879	0.0222638	0.00933357	3826.42	3.32556e-13	1.39416e-13	5.71555e-08
GUINEA-BISSAU	624	Western Africa	16150.9	26121.5	33.0455	46.2998	28.6271	747784	0.140747	0.0870239	2273.2	1.05575e-12	6.5277e-13	1.70514e-08	33.0556	38.5714	23.8487	622964	0.00574303	0.00355091	92.7551	0.137053	0.08474	2213.54	2.067e-12	1.27802e-12	3.3384e-08	32.9951	7.72842	4.77847	124821	0.00369398	0.00228399	59.6612	4.45026e-14	2.75159e-14	7.18758e-10
RUSSIA	643	Eastern Europe	630784	753856	38.3386	39.9075	33.3923	25173032	0.0690399	0.0577686	43549.3	1.83183e-13	1.53277e-13	1.15549e-07	34.8429	36.5928	30.6188	23082150	0.30809	0.257792	194338	0.0430233	0.0359994	27138.4	3.24129e-13	2.71213e-13	2.04456e-07	76.9292	3.31474	2.77358	2.09088e+06	0.0260166	0.0217692	16410.9	4.22366e-14	3.53412e-14	2.66422e-08
RWANDA	646	Eastern Africa	2842.36	4354.94	53.5574	28.5675	18.6453	81199.1	0.280662	0.183181	797.743	2.96269e-14	1.93368e-14	8.42105e-11	51.7393	24.6428	16.0837	70043.6	0.732988	0.478404	2083.42	0	0	0	0	0	0	64.9729	3.92471	2.56156	11155.5	0.280662	0.183181	797.743	5.92539e-14	3.86736e-14	1.68421e-10
SAUDI ARABIA	682	Western Asia	7968.03	6892.76	33.6678	45.444	52.5333	362099	0.00187435	0.00216675	14.9349	2.33831e-14	2.70309e-14	1.86317e-10	36.5429	34.8905	40.3335	278009	0.000472711	0.000546454	3.76658	0.00166668	0.00192668	13.2801	4.65387e-14	5.37987e-14	3.70821e-10	24.1626	10.5535	12.1998	84090.6	0.000207677	0.000240075	1.65478	2.2761e-16	2.63118e-16	1.81361e-12
SENEGAL	686	Western Africa	324352	609382	18.7347	81.6666	43.4681	26488708	0.0210149	0.0111855	6816.23	6.21772e-13	3.30946e-13	2.01673e-07	19.0735	66.8467	35.58	21681830	0.00210038	0.00111796	681.263	0.0193507	0.0102997	6276.43	1.24043e-12	6.60233e-13	4.02335e-07	17.2065	14.82	7.88811	4.80688e+06	0.00166426	0.000885826	539.807	3.11676e-15	1.65893e-15	1.01093e-09
SIERRA LEONE	694	Western Africa	8494.76	10298.4	72.9552	20.9718	17.2989	178150	0.204682	0.168835	1738.72	1.2682e-13	1.04609e-13	1.0773e-09	68.9618	18.4885	15.2505	157055	0.0087001	0.00717642	73.9053	0.203383	0.167764	1727.69	2.49837e-13	2.06082e-13	2.12231e-09	102.686	2.48329	2.04838	21094.9	0.0012986	0.00107117	11.0313	3.80196e-15	3.13611e-15	3.22967e-11
SOUTH AFRICA	710	Southern Africa	8202.57	20139.2	6.14452	249.002	101.417	2.04246e+06	0.85235	0.347156	6991.46	2.74693e-12	1.11881e-12	2.25319e-08	5.98745	212.945	86.7312	1746699	0.530315	0.215994	4349.94	0.812323	0.330853	6663.13	1.44404e-12	5.88147e-13	1.18448e-08	7.07216	36.0569	14.6857	295759	0.0400269	0.0163027	328.323	4.04983e-12	1.64947e-12	3.3219e-08
ZIMBABWE	716	Eastern Africa	40242.7	163468	15.5612	98.3215	24.2049	3956726	0.190981	0.047016	7685.61	8.57137e-13	2.11011e-13	3.44935e-08	15.2674	83.5111	20.5588	3.36072e+06	0.208448	0.051316	8388.52	0.0734705	0.018087	2956.65	6.49522e-13	1.599e-13	2.61386e-08	17.2176	14.8104	3.64604	596011	0.117511	0.0289289	4728.96	1.06475e-12	2.62121e-13	4.28485e-08
SUDAN	736	Northern Africa	500145	2.50469e+06	7.85116	194.876	38.9133	97466000	0.00368161	0.000735155	1841.34	2.22668e-16	4.4463e-17	1.11366e-10	7.94061	160.567	32.0625	80306736	0.00528806	0.00105593	2644.79	8.76071e-05	1.74936e-05	43.8162	2.86132e-16	5.71357e-17	1.43107e-10	7.43254	34.3086	6.85084	17159262	0.00359401	0.000717662	1797.52	1.59204e-16	3.17904e-17	7.96252e-11
TOGO	768	Western Africa	32238.3	78545.6	14.8359	103.128	42.3281	3.32468e+06	0.0206857	0.00849023	666.87	1.19645e-16	4.9107e-17	3.85714e-12	15.1809	83.9869	34.4716	2.70759e+06	0.0747305	0.0306724	2409.18	1.97708e-06	8.11474e-07	0.0637377	1.33057e-16	5.46121e-17	4.28954e-12	13.3218	19.1415	7.85646	617090	0.0206837	0.00848942	666.806	1.06232e-16	4.36019e-17	3.42474e-12
TURKEY	792	Western Asia	4333.69	2942.69	26.2921	58.1925	85.6998	252188	0.217661	0.320549	943.277	8.96795e-13	1.32071e-12	3.88643e-09	24.9053	51.1938	75.393	221858	0.599973	0.883579	2600.1	0.0687541	0.101254	297.959	2.58519e-13	3.8072e-13	1.12034e-09	36.4356	6.99865	10.3069	30330	0.148907	0.219295	645.318	1.53507e-12	2.26069e-12	6.65252e-09
UGANDA	800	Eastern Africa	474493	369866	46.8291	32.672	41.9141	15502617	0.0175741	0.0225454	8338.78	2.26099e-15	2.90057e-15	1.07282e-09	47.5988	26.7864	34.3636	12709948	0.0280227	0.0359497	13296.6	0.000177545	0.000227768	84.2436	3.75603e-16	4.81852e-16	1.78221e-10	43.3262	5.88559	7.55048	2792669	0.0173965	0.0223176	8254.54	4.14638e-15	5.3193e-15	1.96743e-09
UKRAINE	804	Eastern Europe	219044	238452	112.371	13.6157	12.5074	2.98242e+06	0.0705832	0.0648383	15460.8	5.61578e-13	5.1587e-13	1.2301e-07	94.4713	13.4962	12.3977	2.95625e+06	0.0576884	0.052993	12636.3	0.0572378	0.0525791	12537.6	1.12065e-12	1.02943e-12	2.4547e-07	2133.88	0.119501	0.109774	26175.8	0.0133454	0.0122592	2923.23	2.51041e-15	2.30608e-15	5.49889e-10
TANZANIA	834	Eastern Africa	166242	191292	53.3167	28.6965	24.9386	4770542	0.0261502	0.0227257	4347.24	4.04908e-13	3.51885e-13	6.73126e-08	52.9133	24.096	20.9406	4.00575e+06	0.00724696	0.00629795	1204.75	0.0156531	0.0136033	2602.2	4.76361e-13	4.1398e-13	7.91909e-08	55.4292	4.60046	3.99802	764787	0.0104971	0.00912244	1745.05	3.33456e-13	2.89789e-13	5.54342e-08
USA	840	Northern America	208877	169446	24.3435	62.8505	77.4759	13128018	0.0137739	0.0169791	2877.04	2.18523e-14	2.69374e-14	4.56445e-09	24.6992	51.6211	63.6334	10782459	0.067865	0.0836573	14175.4	0.00698094	0.00860542	1458.16	4.12361e-14	5.08318e-14	8.61328e-09	22.7083	11.2294	13.8425	2.34556e+06	0.00679293	0.00837365	1418.89	2.46855e-15	3.04298e-15	5.15623e-10
BURKINA FASO	854	Western Africa	608833	1.03299e+06	17.7682	86.109	50.7515	52425968	0.00369711	0.00217903	2250.92	9.78292e-16	5.76593e-16	5.95616e-10	18.3898	69.3318	40.8633	42211480	0.00513416	0.00302601	3125.84	8.85573e-05	5.21946e-05	53.9166	1.90498e-16	1.12277e-16	1.15981e-10	15.1992	16.7772	9.88825	10214488	0.00360855	0.00212684	2197.01	1.76609e-15	1.04091e-15	1.07525e-09
YEMEN	887	Western Asia	51256.5	100503	25.1624	60.8051	31.0106	3116653	0.57763	0.294591	29607.3	1.74924e-12	8.92114e-13	8.966e-08	24.9572	51.0875	26.0546	2.61857e+06	0.0116089	0.00592053	595.03	0.566534	0.288933	29038.6	3.48055e-12	1.77508e-12	1.78401e-07	26.2413	9.71751	4.95593	498086	0.0110955	0.0056587	568.716	1.79369e-14	9.14779e-15	9.1938e-10
ZAMBIA	894	Eastern Africa	42294.6	70935.6	49.4077	30.9668	18.4636	1.30973e+06	0.0305986	0.0182441	1294.16	3.43025e-14	2.04525e-14	1.45081e-09	43.5326	29.2884	17.4629	1.23874e+06	0.0884071	0.0527118	3739.14	0.00463587	0.00276409	196.072	2.42318e-14	1.4448e-14	1.02488e-09	151.926	1.67845	1.00076	70989.2	0.0259627	0.01548	1098.08	4.43731e-14	2.6457e-14	1.87674e-09

## Sheet: Oilpalm_Country_Level
Country	Country	Sub Region	Dry Production	Crop Area	Nutrient Use Efficiency	Fertiliser Input N&P			Nutrient Loading (N&P) to Aquatic Receptors			Aquatic Species Richness Impact Freshwater and Marine Combined			Nutrient Use Efficiency	N Input			N Load Freshwater			N Load Marine			N Marine Demersal Species Richness impact			Nutrient Use Efficiency	P Input			P Load Freshwater			P Freshwater Fish Species Richness impact
Name	Code		per country	per country		Per Tonne Crop	Per Hectare	Total	Per Tonne Crop	Per Hectare	Total	Per Tonne Crop	Per Hectare	Total	Nitrogen	Per Tonne Crop	Per Hectare	Total	Per Tonne Crop	Per Hectare	Total	Per Tonne Crop	Per Hectare	Total	Per Tonne Crop	Per Hectare	Total	Phopshours	Per Tonne Crop	Per Hectare	Total	Per Tonne Crop	Per Hectare	Total	Per Tonne Crop	Per Hectare	Total
			Tonne	ha	%	kg/tonne crop	kg/ha	kg	kg/tonne crop	kg/ha	kg	PDF.yr/tonne crop	PDF.yr/ha	PDF.yr	%	kg/tonne crop	kg/ha	kg	kg/tonne crop	kg/ha	kg	kg/tonne crop	kg/ha	kg	PDF.yr/tonne crop	PDF.yr/ha	PDF.yr	%	kg/tonne crop	kg/ha	kg	kg/tonne crop	kg/ha	kg	PDF.yr/tonne crop	PDF.yr/ha	PDF.yr
Country	Country_Number	Region	Production	Crop Area (ha)	Nue	Input (kg/tonne crop)	Input (kg/ha)	Input Total (kg)	Load Freshwater (kg/tonne crop)	Load Freshwater (kg/ha)	Load Freshwater (kg)	Freshwater Fish Species Richness (PDF.yr/tonne crop)	Freshwater Fish Species Richness (PDF.yr/ha)	Total Freshwater Fish Species Richness (PDF.yr)	nue	N Input (kg/tonne crop)	N Input (kg/ha)	N Input Total (kg)	N Load Freshwater (kg/tonne crop)	N Load Freshwater (kg/ha)	N Load Total Freshwater kg	N Load Marine (kg/tonne crop)	N Load Marine (kg/ha)	N Load Total Marine (kg)	N Marine Demersal Species Richness (PDF.yr/tonne crop)	N Marine Demersal Species Richness (PDF.yr/ha)	N Marine Total Demersal Species Richness (PDF.yr)	pue	P Input (kg/tonne crop)	P Input (kg/ha)	P Input Total (kg)	P Load Freshwater (kg/tonne crop)	P Load Freshwater (kg/ha)	P Load Freshwater (kg)	P Freshwater Fish Species Richness (PDF.yr/tonne crop)	P Freshwater Fish Species Richness (PDF.yr/ha)	P Total Freshwater Fish Species Richness (PDF.yr)
AFGHANISTAN	4	Southern Asia	805039	235811	7.54102	9.83952	33.5913	7921201	0.0206827	0.0706092	16650.4	7.02911e-14	2.39968e-13	5.65871e-08	7.76944	8.18592	27.9461	6589987	0.0411258	0.1404	33107.9	0.00291982	0.00996804	2350.57	8.66773e-15	2.95909e-14	6.97786e-09	6.41025	1.6536	5.64526	1331214	0.0177629	0.0606412	14299.8	1.31915e-13	4.50346e-13	1.06196e-07
ALBANIA	8	Southern Europe	32311.6	11003.6	1.90955	38.8573	114.103	1255543	4.83738	14.2047	156304	2.59814e-12	7.62931e-12	8.39501e-08	2.14308	29.6769	87.1448	958909	0.375249	1.1019	12124.9	4.63547	13.6118	149780	4.18278e-12	1.22825e-11	1.35153e-07	1.15463	9.18041	26.9578	296634	0.20191	0.592899	6524.05	1.0135e-12	2.97609e-12	3.27478e-08
ALGERIA	12	Northern Africa	245503	69580.2	1.45105	51.1355	180.423	12553898	12.9801	45.7982	3.18665e+06	5.95153e-12	2.0999e-11	1.46112e-06	1.42503	44.6307	157.472	10956964	1.04434	3.68479	256389	12.9579	45.72	3.18121e+06	1.18491e-11	4.18078e-11	2.90899e-06	1.62958	6.50476	22.951	1.59693e+06	0.0221631	0.0781987	5441.09	5.39157e-14	1.90233e-13	1.32364e-08
ANGOLA	24	Middle Africa	18920.8	16269.5	8.87269	8.36274	9.72554	158230	0.0692087	0.080487	1309.49	6.28839e-14	7.31315e-14	1.18982e-09	7.66821	8.29398	9.64557	156929	0.0125945	0.014647	238.299	0.0661398	0.0769179	1251.42	1.08714e-13	1.26431e-13	2.05697e-09	154.166	0.0687571	0.0799618	1300.94	0.00306895	0.00356907	58.0671	1.70533e-14	1.98323e-14	3.22663e-10
AZERBAIJAN	31	Western Asia	103756	46200.7	2.85416	25.9971	58.3832	2697347	0.0231895	0.0520779	2406.04	1.15161e-15	2.58624e-15	1.19486e-10	2.93115	21.698	48.7284	2.25129e+06	0.0664907	0.149322	6898.78	0	0	0	0	0	0	2.46561	4.29914	9.65482	446059	0.0231895	0.0520779	2406.04	2.30323e-15	5.17249e-15	2.38973e-10
ARGENTINA	32	South America	450777	86614.5	4.63025	16.0251	83.4009	7223731	0.104114	0.541853	46932.4	2.16054e-13	1.12443e-12	9.73923e-08	6.80139	9.35103	48.6666	4215231	0.0117036	0.0609103	5275.72	0.0998918	0.519878	45028.9	4.12763e-13	2.14819e-12	1.86064e-07	1.58825	6.67403	34.7344	3.0085e+06	0.00422256	0.0219759	1903.43	1.93451e-14	1.0068e-13	8.72033e-09
AUSTRALIA	36	Australia and New Zealand	269670	39520.6	3.05503	24.2878	165.729	6.54971e+06	0.188468	1.28602	50824.3	1.48904e-13	1.01605e-12	4.01551e-08	3.53444	17.9944	122.785	4852552	0.0726037	0.495414	19579.1	0.186455	1.27228	50281.3	2.67785e-13	1.82724e-12	7.22136e-08	1.68429	6.29344	42.9436	1.69715e+06	0.00201365	0.0137403	543.023	3.00236e-14	2.04868e-13	8.09649e-09
AUSTRIA	40	Western Europe	140013	22587.3	2.22026	33.4195	207.158	4.67914e+06	2.66183	16.5	372690	6.10589e-12	3.78487e-11	8.54901e-07	2.25559	28.1967	174.783	3.94788e+06	0.198154	1.2283	27744	2.65474	16.456	371697	1.22096e-11	7.56837e-11	1.70949e-06	2.02956	5.2228	32.3747	731258	0.00709189	0.0439606	992.953	2.20942e-15	1.36956e-14	3.09346e-10
BANGLADESH	50	Southern Asia	537104	207349	1.19221	62.2374	161.216	33427968	3.35077	8.67964	1799715	3.14253e-12	8.14022e-12	1.68787e-06	1.18736	53.5642	138.75	28769598	0.0188641	0.0488644	10132	3.34977	8.67704	1.79918e+06	6.26208e-12	1.62209e-11	3.36339e-06	1.22217	8.67312	22.4663	4658370	0.0010024	0.00259655	538.393	2.29819e-14	5.9531e-14	1.23437e-08
ARMENIA	51	Western Asia	85366.8	33213.4	3.32802	22.2955	57.305	1.9033e+06	0.126	0.323851	10756.2	3.93097e-15	1.01036e-14	3.35574e-10	3.16184	20.1148	51.7001	1717139	0.366959	0.943176	31326.1	0	0	0	0	0	0	4.86088	2.18068	5.60488	186157	0.126	0.323851	10756.2	7.86194e-15	2.02071e-14	6.71148e-10
BELGIUM	56	Western Europe	193783	36045.9	0.794654	93.374	501.98	18094298	11.8821	63.8784	2.30255e+06	7.00338e-11	3.76503e-10	1.35714e-05	0.834933	76.1738	409.512	14761200	0.0356455	0.191631	6907.5	11.881	63.8725	2.30234e+06	1.40068e-10	7.53006e-10	2.71427e-05	0.616274	17.2001	92.4683	3.3331e+06	0.00108936	0.00585643	211.1	3.2417e-17	1.74274e-16	6.28187e-12
BHUTAN	64	Southern Asia	6445.17	3105.83	2.48683	29.8372	61.9178	192306	13.6526	28.3316	87993.1	1.52854e-11	3.17201e-11	9.85171e-08	2.64577	24.0383	49.884	154931	0.157483	0.326806	1015	13.5887	28.199	87581.3	2.98924e-11	6.20323e-11	1.92662e-07	1.82794	5.79888	12.0337	37374.8	0.0638979	0.1326	411.833	6.78415e-13	1.40784e-12	4.3725e-09
BOLIVIA	68	South America	162095	129449	2.64001	28.106	35.1941	4555841	0.19807	0.248022	32106.2	3.22248e-13	4.03517e-13	5.22348e-08	2.78938	22.8008	28.551	3695895	0.168624	0.21115	27333.2	0.140277	0.175654	22738.2	5.31226e-13	6.65198e-13	8.61092e-08	1.99804	5.30519	6.64312	859946	0.0577928	0.0723678	9367.94	1.1327e-13	1.41835e-13	1.83605e-08
BOSNIA AND HERZEGOVINA	70	Southern Europe	78551.1	44767.9	1.52137	48.772	85.5768	3.83109e+06	6.89469	12.0976	541585	1.51751e-11	2.66266e-11	1.19202e-06	1.58708	40.0736	70.3144	3.14783e+06	0.507863	0.891111	39893.2	6.75872	11.8591	530905	1.68397e-11	2.95474e-11	1.32278e-06	1.21862	8.69839	15.2625	683268	0.13597	0.238577	10680.6	1.35104e-11	2.37058e-11	1.06126e-06
BRAZIL	76	South America	598278	161125	0.95898	77.3739	287.299	46291072	0.293848	1.09109	175803	8.85977e-13	3.28974e-12	5.3006e-07	1.70659	37.2674	138.378	22296248	0.166803	0.619362	99794.8	0.25563	0.949185	152938	1.41955e-12	5.27096e-12	8.49285e-07	0.264296	40.1065	148.92	23994824	0.0382181	0.141908	22865	3.52403e-13	1.30852e-12	2.10835e-07
BULGARIA	100	Eastern Europe	110252	46887.7	0.605051	122.634	288.362	13520641	13.8352	32.5322	1.52536e+06	1.33717e-11	3.14422e-11	1.47425e-06	0.740412	85.8981	201.981	9470414	19.758	46.459	2.17835e+06	13.5445	31.8486	1.49331e+06	2.62571e-11	6.17409e-11	2.89489e-06	0.288544	36.7362	86.3815	4050227	0.290725	0.683611	32052.9	4.86286e-13	1.14345e-12	5.36138e-08
MYANMAR	104	South-eastern Asia	59199.2	26042.9	5.74688	12.9114	29.3493	764342	2.02419	4.60126	119830	2.38824e-12	5.4288e-12	1.41382e-07	5.41083	11.7542	26.7189	695839	0.0253409	0.0576034	1500.16	2.01788	4.58691	119457	3.55437e-12	8.07957e-12	2.10416e-07	9.16046	1.15715	2.63035	68502.1	0.00631534	0.0143556	373.863	1.22212e-12	2.77804e-12	7.23482e-08
BELARUS	112	Eastern Europe	1.66042e+06	626065	2.16555	34.2638	90.8727	56892236	0.573017	1.51973	951449	2.36853e-12	6.28169e-12	3.93275e-06	2.29406	27.7238	73.5276	46033112	0.0916521	0.243075	152181	0.568797	1.50854	944443	4.737e-12	1.25633e-11	7.86542e-06	1.6208	6.53998	17.345	10859125	0.00421946	0.0111906	7006.08	5.05038e-17	1.33944e-16	8.38576e-11
CAMEROON	120	Middle Africa	21285.5	21962	1.15345	64.329	62.3475	1.36927e+06	0.322417	0.312486	6862.79	3.11778e-13	3.02174e-13	6.63634e-09	1.19272	53.3235	51.681	1135017	0.0513509	0.0497692	1093.03	0.308728	0.299218	6571.42	6.07017e-13	5.88319e-13	1.29206e-08	0.96316	11.0054	10.6665	234256	0.0136891	0.0132674	291.378	1.65387e-14	1.60293e-14	3.52035e-10
CANADA	124	Northern America	928699	158642	1.39778	53.0842	310.757	49299240	0.578388	3.38591	537148	6.01974e-12	3.52398e-11	5.59052e-06	1.36179	46.7031	273.402	43373160	0.961025	5.62588	892502	0.564224	3.30299	523994	1.20252e-11	7.03959e-11	1.11678e-05	1.66117	6.38106	37.355	5926080	0.0141641	0.0829171	13154.2	1.43081e-14	8.376e-14	1.32879e-08
SRI LANKA	144	Southern Asia	11642.3	4493.98	2.89743	25.6089	66.3435	298146	1.91433	4.95935	22287.2	6.30405e-12	1.63315e-11	7.33935e-08	3.22892	19.697	51.0279	229318	0.047258	0.122428	550.19	1.89486	4.9089	22060.5	7.28926e-13	1.88838e-12	8.48636e-09	1.79299	5.91193	15.3157	68828.3	0.0194752	0.0504533	226.736	1.18792e-11	3.07747e-11	1.38301e-07
CHILE	152	South America	155006	44045.5	1.02298	72.5334	255.261	11243082	0.229871	0.808965	35631.3	1.36836e-13	4.81557e-13	2.12104e-08	1.25507	50.6745	178.334	7854827	0.062079	0.218469	9622.59	0.210358	0.740294	32606.6	1.26592e-13	4.45503e-13	1.96224e-08	0.484928	21.8589	76.9262	3.38825e+06	0.019513	0.0686705	3024.63	1.47081e-13	5.1761e-13	2.27984e-08
CHINA	156	Eastern Asia	13327188	4352925	0.937501	79.1465	242.32	1054800832	4.53137	13.8735	60390412	1.23056e-11	3.76755e-11	0.000163999	0.947953	67.092	205.413	894147200	0.851521	2.60707	11348380	4.46478	13.6696	59502924	2.37097e-11	7.25913e-11	0.000315984	0.879334	12.0546	36.9071	160653632	0.0665924	0.203883	887489	9.01376e-13	2.75971e-12	1.20128e-05
TAIWAN	158		8582.67	1845.43	1.4279	51.9645	241.675	445994	5.32254	24.7539	45681.6	1.53216e-11	7.12575e-11	1.31501e-07	1.38779	45.8281	213.136	393327	0.101542	0.472248	871.5	5.30868	24.6895	45562.6	1.09205e-11	5.07888e-11	9.3727e-08	1.7274	6.13637	28.5389	52666.4	0.0138596	0.0644578	118.952	1.97228e-11	9.17262e-11	1.69274e-07
COLOMBIA	170	South America	574388	162817	1.56311	47.4696	167.464	27265948	0.650625	2.29529	373711	1.87584e-12	6.61761e-12	1.07746e-06	1.67779	37.9071	133.729	21773346	0.248254	0.875796	142594	0.606448	2.13944	348336	6.52102e-13	2.3005e-12	3.7456e-07	1.10849	9.56253	33.7349	5492601	0.044177	0.155849	25374.7	3.09957e-12	1.09347e-11	1.78036e-06
CONGO D.C	180	Middle Africa	18422	19043.4	3.95319	18.7696	18.1572	345775	0.318069	0.307691	5859.48	4.37326e-13	4.23056e-13	8.05643e-09	3.9355	16.1606	15.6333	297711	0.0594822	0.0575413	1095.78	0.230243	0.22273	4241.55	5.01816e-13	4.85443e-13	9.24448e-09	4.06277	2.60906	2.52392	48064.1	0.0878257	0.0849601	1617.93	3.72835e-13	3.6067e-13	6.86839e-09
COSTA RICA	188	Central America	14654.9	3148.27	0.8146	91.0877	424.004	1.33488e+06	1.24449	5.79299	18237.9	4.16122e-12	1.93701e-11	6.09821e-08	1.40353	45.3143	210.934	664076	0.0385494	0.179444	564.936	1.23109	5.73059	18041.4	3.97295e-13	1.84937e-12	5.82231e-09	0.231576	45.7734	213.071	670803	0.0134054	0.0624007	196.454	7.92514e-12	3.68908e-11	1.16142e-07
CROATIA	191	Southern Europe	130395	64239.7	1.33851	55.4348	112.523	7228424	8.00306	16.2448	1.04356e+06	9.98279e-12	2.02633e-11	1.30171e-06	1.38653	45.87	93.1079	5981226	0.23791	0.482916	31022.4	7.98672	16.2116	1041429	1.97137e-11	4.00153e-11	2.57057e-06	1.10824	9.56476	19.4147	1.2472e+06	0.0163417	0.0331707	2130.87	2.51851e-13	5.11212e-13	3.28401e-08
CUBA	192	Caribbean	62647.7	13498.7	32.6065	2.27562	10.5612	142562	0.00811573	0.0376653	508.431	4.63761e-14	2.15233e-13	2.90536e-09	29.0822	2.18691	10.1495	137004	0.000310174	0.00143952	19.4317	0.00764897	0.035499	479.19	2.63155e-15	1.22131e-14	1.6486e-10	119.481	0.088717	0.411737	5557.91	0.00046676	0.00216624	29.2414	9.01207e-14	4.18252e-13	5.64585e-09
CZECHIA	203	Eastern Europe	209216	48555.9	1.77728	41.7492	179.888	8734600	3.69588	15.9247	773238	8.47901e-12	3.65341e-11	1.77394e-06	1.95265	32.5711	140.341	6814388	0.283312	1.22073	59273.4	3.67765	15.8461	769423	1.6957e-11	7.30637e-11	3.54767e-06	1.15492	9.17813	39.5464	1.92021e+06	0.0182331	0.0785622	3814.66	1.03956e-15	4.47924e-15	2.17493e-10
DENMARK	208	Northern Europe	308958	36501.5	3.08152	24.079	203.811	7439422	7.43115	62.8993	2.29592e+06	4.37887e-11	3.70639e-10	1.35289e-05	3.10872	20.4586	173.167	6320858	0.00227987	0.0192974	704.384	7.43092	62.8973	2.29584e+06	8.75774e-11	7.41278e-10	2.70578e-05	2.92782	3.62044	30.6443	1.11856e+06	0.000232838	0.0019708	71.9373	3.62697e-17	3.06997e-16	1.12058e-11
DOMINICAN REPUBLIC	214	Caribbean	7573.84	2607.71	1.24035	59.8218	173.747	453081	0.795992	2.31188	6028.72	1.82314e-12	5.29512e-12	1.38082e-08	1.18386	53.7226	156.032	406886	0.246969	0.717296	1870.5	0.762472	2.21452	5774.84	2.52127e-13	7.32278e-13	1.90957e-09	1.73792	6.09925	17.7147	46194.8	0.0335203	0.0973562	253.877	3.39415e-12	9.85797e-12	2.57068e-08
ECUADOR	218	South America	96590.7	51826.9	0.671678	110.47	205.884	10670344	1.64104	3.05844	158509	6.86769e-13	1.27994e-12	6.63355e-08	0.90022	70.6494	131.671	6824075	0.18995	0.354013	18347.4	1.57611	2.93742	152237	1.03228e-12	1.92388e-12	9.97086e-08	0.266196	39.8203	74.2138	3846269	0.0649323	0.121016	6271.86	3.41259e-13	6.36011e-13	3.29625e-08
ETHIOPIA	231	Eastern Africa	78572.5	42561.7	2.87728	25.7882	47.6073	2.02625e+06	0.154611	0.285424	12148.1	2.39039e-13	4.41287e-13	1.87819e-08	3.15996	20.1268	37.1558	1.58142e+06	0.0292782	0.0540501	2300.46	0.11002	0.203106	8644.55	3.6059e-13	6.6568e-13	2.83325e-08	1.87232	5.66142	10.4515	444832	0.0445906	0.0823181	3503.6	1.17488e-13	2.16893e-13	9.23135e-09
ESTONIA	233	Northern Europe	73102.6	26129.3	7.04047	10.5391	29.4854	770434	0.613156	1.71544	44823.4	3.4489e-12	9.64906e-12	2.52124e-07	7.35633	8.64562	24.188	632017	0.00233202	0.00652435	170.477	0.611201	1.70997	44680.4	6.89713e-12	1.92963e-11	5.04198e-07	5.59823	1.89346	5.29737	138417	0.00195528	0.00547033	142.936	6.68594e-16	1.87054e-15	4.8876e-11
FINLAND	246	Northern Europe	129634	30480.9	1.87176	39.6417	168.595	5.13892e+06	6.42011	27.3044	832264	3.50657e-11	1.49133e-10	4.5457e-06	2.38602	26.6553	113.364	3455427	0.0999157	0.424937	12952.5	6.41412	27.279	831488	7.01305e-11	2.98262e-10	9.0913e-06	0.816234	12.9865	55.2309	1.68349e+06	0.00598705	0.0254627	776.125	7.78638e-16	3.31151e-15	1.00938e-10
FRANCE	250	Western Europe	1.26613e+06	152920	5.51628	13.4511	111.371	17030844	0.474158	3.92589	600346	2.34938e-12	1.94522e-11	2.97463e-06	5.71172	11.135	92.1945	14098374	0.00841097	0.0696404	10649.4	0.472939	3.9158	598803	4.69629e-12	3.88839e-11	5.94612e-06	4.57669	2.31609	19.1765	2932471	0.00121858	0.0100895	1542.88	2.46983e-15	2.04495e-14	3.12714e-09
GEORGIA	268	Western Asia	82346.8	34305.5	1.93005	38.4445	92.282	3.16578e+06	3.64828	8.75731	300424	8.92277e-12	2.14182e-11	7.34761e-07	1.83913	34.5815	83.0093	2847677	0.932426	2.23819	76782.2	3.49455	8.3883	287765	1.78191e-11	4.27729e-11	1.46735e-06	2.74398	3.863	9.27272	318106	0.153732	0.369017	12659.3	2.64044e-14	6.33809e-14	2.17432e-09
PALESTINE, STATE OF	275	Western Asia	18022.8	2570.06	0.898537	82.5787	579.09	1.4883e+06	8.82564	61.8906	159062	2.59024e-13	1.81643e-12	4.66834e-09	1.08196	58.7825	412.217	1.05942e+06	0.0107158	0.0751452	193.128	8.82476	61.8844	159047	4.39914e-13	3.08493e-12	7.92847e-09	0.445449	23.7962	166.873	428874	0.000872624	0.00611935	15.7271	7.81352e-14	5.4793e-13	1.40821e-09
GERMANY	276	Western Europe	2.25567e+06	264477	2.47301	30.0039	255.897	67678896	6.32642	53.9567	14270315	1.99984e-11	1.70562e-10	4.51098e-05	2.54489	24.9912	213.145	56371992	0.052038	0.443821	117381	6.32468	53.9419	14266398	3.99967e-11	3.41123e-10	9.02193e-05	2.11465	5.01266	42.7519	11306906	0.00173648	0.0148101	3916.92	1.64781e-16	1.40538e-15	3.71692e-10
GREECE	300	Southern Europe	175598	42291	1.0996	67.4789	280.181	11849130	12.1555	50.4712	2134476	1.10754e-11	4.59864e-11	1.94481e-06	1.17398	54.1745	224.94	9512915	2.72296	11.3061	478145	12.0826	50.1685	2.12167e+06	1.08527e-11	4.50616e-11	1.9057e-06	0.796731	13.3044	55.2415	2.33622e+06	0.0729003	0.302692	12801.1	1.12981e-11	4.69111e-11	1.98392e-06
GUATEMALA	320	Central America	46987.8	9868.23	2.17473	34.1192	162.459	1603186	0.51805	2.46671	24342	1.71957e-13	8.18777e-13	8.07988e-09	2.24068	28.3842	135.152	1.33371e+06	0.0387302	0.184414	1819.84	0.507936	2.41855	23866.8	2.34402e-13	1.11611e-12	1.10141e-08	1.84829	5.73502	27.3074	269476	0.0101147	0.0481614	475.268	1.09512e-13	5.21442e-13	5.14571e-09
HUNGARY	348	Eastern Europe	193718	44184.5	2.01664	36.7938	161.315	7.12762e+06	1.59788	7.00556	309538	3.66816e-12	1.60823e-11	7.10589e-07	1.98287	32.0747	140.625	6.21344e+06	0.0914336	0.400872	17712.3	1.5954	6.99468	309057	7.33584e-12	3.21624e-11	1.42108e-06	2.24618	4.71912	20.69	914177	0.00248266	0.0108847	480.936	4.93116e-16	2.16197e-15	9.55255e-11
INDIA	356	Southern Asia	4.82829e+06	1.26992e+06	1.5986	46.4157	176.474	224108496	3.06566	11.6557	14801897	2.14395e-12	8.15138e-12	1.03516e-05	1.58128	40.2206	152.92	194196544	0.0837395	0.31838	404319	3.06093	11.6377	14779056	4.23045e-12	1.60843e-11	2.04258e-05	1.71102	6.19514	23.5541	29911956	0.00473066	0.0179861	22841	5.74622e-14	2.18473e-13	2.77444e-07
INDONESIA	360	South-eastern Asia	191856	60165.8	2.02825	36.5833	116.657	7018735	2.77817	8.859	533009	1.12113e-12	3.57506e-12	2.15096e-07	2.0278	31.3641	100.014	6.0174e+06	0.0223315	0.0712106	4284.44	2.77582	8.85151	532558	1.80562e-12	5.75774e-12	3.46419e-07	2.03098	5.21917	16.6428	1.00133e+06	0.00234927	0.00749133	450.722	4.36646e-13	1.39237e-12	8.37733e-08
IRAN	364	Southern Asia	737515	162979	2.11952	35.0079	158.419	25818868	0.213027	0.963997	157111	6.45753e-13	2.92218e-12	4.76253e-07	2.33641	27.2213	123.182	20076088	0.703755	3.18465	519030	0.18903	0.855403	139412	1.80836e-13	8.18325e-13	1.33369e-07	1.3613	7.78666	35.2364	5.74278e+06	0.0239975	0.108594	17698.5	1.11067e-12	5.02604e-12	8.19136e-07
IRAQ	368	Western Asia	84691.9	25511.3	0.496026	149.589	496.601	12668959	0.28665	0.951614	24276.9	3.4912e-13	1.159e-12	2.95676e-08	0.521538	121.947	404.836	10327924	0.348245	1.15609	29493.5	0.241056	0.80025	20415.4	6.87708e-13	2.28303e-12	5.82433e-08	0.383477	27.6418	91.7645	2.34104e+06	0.0455946	0.151364	3861.5	1.05327e-14	3.49663e-14	8.92038e-10
IRELAND	372	Northern Europe	104737	15792.6	1.56615	47.3774	314.208	4.96216e+06	0.489566	3.24681	51275.6	2.97255e-12	1.9714e-11	3.11336e-07	2.03916	31.1894	206.848	3.26667e+06	0.012231	0.081116	1281.03	0.488473	3.23956	51161	5.94379e-12	3.94193e-11	6.22533e-07	0.654804	16.1881	107.359	1695485	0.0010935	0.0072521	114.53	1.32194e-15	8.76714e-15	1.38456e-10
ISRAEL	376	Western Asia	25093.3	3809.53	0.772946	95.9964	632.326	2408868	8.44337	55.6163	211872	2.81218e-11	1.85238e-10	7.0567e-07	0.918393	69.2514	456.157	1.73775e+06	0.0137795	0.0907653	345.773	8.43531	55.5632	211670	5.27974e-12	3.47775e-11	1.32486e-07	0.396336	26.745	176.169	671121	0.0080584	0.0530805	202.212	5.09639e-11	3.35698e-10	1.27885e-06
ITALY	380	Southern Europe	361266	68830.9	1.88352	39.3942	206.764	14231777	5.89785	30.9554	2.13069e+06	3.50216e-12	1.83814e-11	1.26521e-06	2.05092	31.0104	162.761	11202994	2.75228	14.4456	994305	5.8916	30.9226	2128432	6.851e-12	3.59581e-11	2.47503e-06	1.26434	8.38382	44.0032	3.02878e+06	0.00625416	0.0328255	2259.41	1.53327e-13	8.04753e-13	5.53919e-08
JAPAN	392	Eastern Asia	608348	90011.5	1.51079	49.1134	331.936	29878068	2.58988	17.5039	1.57555e+06	2.59088e-12	1.75106e-11	1.57616e-06	2.00143	31.7772	214.768	19331616	0.153276	1.03593	93245.4	2.53436	17.1286	1.54177e+06	5.01953e-12	3.39248e-11	3.05362e-06	0.611437	17.3362	117.168	10546451	0.0555257	0.375274	33778.9	1.6223e-13	1.09644e-12	9.86922e-08
KAZAKHSTAN	398	Central Asia	362814	154361	11.3247	6.55206	15.4001	2.37717e+06	0.0949368	0.223142	34444.4	9.11261e-14	2.14185e-13	3.30618e-08	11.6373	5.4652	12.8455	1.98285e+06	0.106868	0.251185	38773.1	0.0703012	0.165238	25506.2	1.81451e-13	4.26487e-13	6.58329e-08	9.75287	1.08686	2.55458	394327	0.0246356	0.0579041	8938.12	8.01174e-16	1.8831e-15	2.90677e-10
JORDAN	400	Western Asia	20597.2	3685.84	0.664947	111.588	623.574	2298394	5.44866	30.4481	112227	9.06401e-15	5.06514e-14	1.86693e-10	0.784911	81.0283	452.801	1.66895e+06	0.00530771	0.0296605	109.324	5.44816	30.4453	112217	4.42927e-16	2.47516e-15	9.12304e-12	0.346864	30.5596	170.773	629441	0.00050124	0.00280102	10.3241	1.76851e-14	9.88276e-14	3.64263e-10
KENYA	404	Eastern Africa	187025	112537	1.43356	51.7591	86.0184	9680256	0.0497739	0.0827191	9308.96	9.73193e-14	1.61735e-13	1.82011e-08	1.74832	36.3779	60.4563	6.80357e+06	0.0308108	0.0512044	5762.39	0.0370017	0.061493	6920.23	6.52116e-14	1.08375e-13	1.21962e-08	0.689149	15.3813	25.5621	2876684	0.0127722	0.0212262	2388.73	1.29427e-13	2.15095e-13	2.42061e-08
N. KOREA	408	Eastern Asia	349761	162862	1.16675	63.5954	136.577	22243218	6.95975	14.9467	2.43425e+06	4.868e-11	1.04545e-10	1.70264e-05	1.19842	53.0699	113.972	18561796	0.641693	1.37809	224439	6.8431	14.6962	2.39345e+06	9.73218e-11	2.09007e-10	3.40394e-05	1.00708	10.5255	22.6045	3.68142e+06	0.116648	0.250511	40798.9	3.81489e-14	8.19282e-14	1.3343e-08
S.KOREA	410	Eastern Asia	126277	23998.7	1.16378	63.7579	335.484	8.05117e+06	4.47429	23.543	565001	3.90626e-11	2.05541e-10	4.93272e-06	1.27894	49.7288	261.665	6.27961e+06	0.192816	1.01457	24348.2	4.43985	23.3618	560652	7.79988e-11	4.10417e-10	9.84947e-06	0.755569	14.0292	73.8192	1.77156e+06	0.0344423	0.18123	4349.28	1.26425e-13	6.65228e-13	1.59646e-08
KYRGYZSTAN	417	Central Asia	214805	66233	8.00039	9.27455	30.0789	1.99222e+06	0.198924	0.645143	42729.8	5.83512e-15	1.89243e-14	1.25341e-09	7.45546	8.53067	27.6664	1.83243e+06	0.725148	2.35177	155765	0	0	0	0	0	0	14.2495	0.743887	2.41255	159790	0.198924	0.645143	42729.8	1.16702e-14	3.78485e-14	2.50682e-09
LAO PEOPLEâ€™S DEMOCRATIC REPUBLIC	418	South-eastern Asia	7290.21	5325.85	2.69484	27.5341	37.6895	200729	0.922125	1.26223	6722.48	1.06254e-12	1.45445e-12	7.74617e-09	2.91281	21.8346	29.8879	159179	0.113338	0.155141	826.256	0.890481	1.21892	6491.79	1.92214e-12	2.63108e-12	1.40128e-08	1.85983	5.69946	7.80161	41550.2	0.0316437	0.043315	230.689	2.02953e-13	2.77809e-13	1.47957e-09
LEBANON	422	Western Asia	64353.5	14273.3	0.750848	98.8215	445.555	6359516	8.52394	38.4317	548546	1.80571e-10	8.14137e-10	1.16204e-05	0.932352	68.2146	307.558	4389850	0.396892	1.78946	25541.4	8.46832	38.181	544967	6.93631e-12	3.12736e-11	4.46376e-07	0.346326	30.607	137.997	1.96967e+06	0.0556165	0.250757	3579.12	3.54206e-10	1.597e-09	2.27944e-05
LESOTHO	426	Southern Africa	17510	5008.44	3.3208	22.344	78.1171	391245	0.504316	1.76314	8830.6	3.1799e-11	1.11173e-10	5.56801e-07	3.61666	17.5853	61.48	307919	1.00488	3.51317	17595.5	0.00432595	0.015124	75.7476	1.42615e-14	4.98596e-14	2.49719e-10	2.22748	4.75874	16.637	83325.7	0.49999	1.74802	8754.85	6.35837e-11	2.22295e-10	1.11335e-06
LATVIA	428	Northern Europe	160435	55815.4	2.35022	31.5716	90.7489	5065186	4.89022	14.0564	784562	2.71558e-11	7.80562e-11	4.35674e-06	2.6863	23.6757	68.0531	3798413	0.0248901	0.0715437	3993.24	4.88899	14.0529	784366	5.43113e-11	1.56112e-10	8.71344e-06	1.34248	7.89586	22.6958	1266773	0.00122379	0.00351764	196.339	2.01083e-16	5.77991e-16	3.22608e-11
LIBYA	434	Northern Africa	35885.5	8495.92	2.18128	34.0167	143.681	1.22071e+06	1.35344	5.71672	48568.8	6.07377e-13	2.56547e-12	2.1796e-08	3.11327	20.4287	86.2877	733094	0.00200565	0.00847155	71.9736	1.35336	5.71638	48565.9	1.21474e-12	5.13087e-12	4.35915e-08	0.7801	13.588	57.3937	487613	8.16349e-05	0.000344814	2.92951	1.62561e-17	6.86635e-17	5.8336e-13
LITHUANIA	440	Northern Europe	337091	111170	3.70565	20.0235	60.7154	6749732	2.84302	8.62064	958356	1.11683e-11	3.38646e-11	3.76473e-06	3.91468	16.2465	49.263	5476559	0.0141844	0.0430101	4781.43	2.84192	8.61731	957985	2.23366e-11	6.77292e-11	7.52945e-06	2.8065	3.77694	11.4525	1.27317e+06	0.00109953	0.00333402	370.643	1.97442e-17	5.98686e-17	6.65559e-12
MADAGASCAR	450	Eastern Africa	26463	21490	5.39542	13.7524	16.9348	363930	0.057962	0.0713749	1533.85	4.87498e-14	6.0031e-14	1.29007e-09	5.45764	11.6534	14.3501	308384	0.016101	0.0198269	426.081	0.0526314	0.0648108	1392.79	2.81712e-14	3.46903e-14	7.45495e-10	5.04999	2.09901	2.58474	55546.2	0.00533058	0.00656412	141.063	6.93285e-14	8.53717e-14	1.83464e-09
MALAWI	454	Eastern Africa	240760	98325.4	1.91785	38.6891	94.7341	9314770	0.0759066	0.185865	18275.2	1.49108e-13	3.65107e-13	3.58993e-08	1.93857	32.8076	80.3327	7898749	0.0122436	0.0299796	2947.76	0.0675739	0.165461	16269	1.82002e-13	4.45651e-13	4.38188e-08	1.80227	5.88147	14.4014	1.41602e+06	0.00833275	0.0204036	2006.19	1.16214e-13	2.84563e-13	2.79797e-08
MEXICO	484	Central America	313804	64572.8	1.5054	49.2893	239.531	15467193	0.489462	2.37864	153595	2.44747e-12	1.1894e-11	7.68027e-07	1.64059	38.7666	188.394	12165119	0.06638	0.322586	20830.3	0.476869	2.31744	149644	4.74726e-12	2.30703e-11	1.48971e-06	1.00734	10.5227	51.1372	3.30207e+06	0.0125927	0.0611967	3951.64	1.47677e-13	7.17663e-13	4.63415e-08
MONGOLIA	496	Eastern Asia	14259	8533.11	10.003	7.41779	12.3953	105770	0.0783264	0.130885	1116.86	1.16921e-13	1.95377e-13	1.66717e-09	9.0963	6.99186	11.6835	99696.9	0.0963777	0.161049	1374.25	0.0499982	0.083548	712.924	2.29457e-13	3.83427e-13	3.27182e-09	24.8867	0.42593	0.711739	6073.34	0.0283283	0.0473371	403.933	4.38469e-15	7.32691e-15	6.25213e-11
MOLDOVA	498	Eastern Europe	79226.8	56512.9	2.2043	33.6614	47.1908	2.66689e+06	2.54644	3.56992	201747	6.42309e-12	9.0047e-12	5.08881e-07	2.13543	29.7832	41.7538	2359629	0.116426	0.163221	9224.09	2.52272	3.53666	199867	1.28433e-11	1.80053e-11	1.01753e-06	2.73321	3.87822	5.43698	307259	0.023727	0.0332635	1879.82	2.90296e-15	4.06974e-15	2.29993e-10
MONTENEGRO	499	Southern Europe	12210	10243.6	0.704087	105.385	125.615	1.28675e+06	8.22581	9.80492	100438	5.07944e-12	6.05454e-12	6.20202e-08	0.688765	92.3391	110.065	1127465	2.99789	3.57339	36604.4	7.15546	8.5291	87368.5	9.49192e-12	1.13141e-11	1.15897e-07	0.812539	13.0455	15.5499	159287	1.07035	1.27582	13069	6.66956e-13	7.94992e-13	8.14356e-09
MOROCCO	504	Northern Africa	212650	60076.4	0.933114	79.5186	281.469	16909624	5.01938	17.7669	1.06737e+06	7.53241e-12	2.66622e-11	1.60177e-06	0.911714	69.7587	246.922	14834167	0.959333	3.39571	204002	4.98722	17.6531	1.06053e+06	1.49871e-11	5.30491e-11	3.187e-06	1.08607	9.75997	34.547	2.07546e+06	0.0321586	0.11383	6838.51	7.77633e-14	2.75255e-13	1.65363e-08
MOZAMBIQUE	508	Eastern Africa	12773.4	4306.62	21.9568	3.37936	10.0231	43165.9	0.00811713	0.0240754	103.683	2.30696e-14	6.84243e-14	2.94677e-10	19.6808	3.23157	9.58483	41278.2	0.00250122	0.00741861	31.9491	0.00614273	0.0182193	78.4636	9.99908e-15	2.96572e-14	1.27722e-10	71.7271	0.147782	0.438321	1887.68	0.0019744	0.00585605	25.2198	3.61401e-14	1.07191e-13	4.61632e-10
NEPAL	524	Southern Asia	248545	121088	1.61069	46.0672	94.5577	11449795	4.43672	9.10682	1.10273e+06	5.55698e-12	1.14063e-11	1.38116e-06	1.78039	35.7225	73.3241	8878657	0.167011	0.342806	41509.7	4.37292	8.97586	1086868	9.57015e-12	1.96437e-11	2.37862e-06	1.02468	10.3447	21.2337	2571138	0.0638024	0.130961	15857.8	1.54381e-12	3.16882e-12	3.83706e-07
NETHERLANDS	528	Western Europe	1.34909e+06	144828	1.6444	45.1228	420.325	60874776	0.828203	7.71482	1.11732e+06	3.87389e-12	3.60858e-11	5.22623e-06	1.74416	36.4645	339.671	49193916	2.62473	24.4497	3540999	0.827812	7.71117	1.11679e+06	7.74778e-12	7.21716e-11	1.04525e-05	1.22426	8.65832	80.6534	11680858	0.000391018	0.00364238	527.519	4.17011e-18	3.88451e-17	5.62586e-12
NEW ZEALAND	554	Australia and New Zealand	103251	11376.6	1.42167	52.1922	473.682	5388874	1.10112	9.99342	113691	1.60106e-12	1.45308e-11	1.65311e-07	1.73357	36.6873	332.964	3787986	0.0107367	0.0974434	1108.57	1.09993	9.98263	113568	3.20089e-12	2.90504e-11	3.30494e-07	0.683656	15.5049	140.718	1.60089e+06	0.00118883	0.0107895	122.747	1.23389e-15	1.11985e-14	1.274e-10
NIGERIA	566	Western Africa	94048.3	100096	2.31042	32.1154	30.175	3.02039e+06	0.235835	0.221587	22179.9	2.21634e-13	2.08244e-13	2.08443e-08	2.38591	26.6565	25.0459	2.50699e+06	0.0215723	0.0202689	2028.84	0.228671	0.214856	21506.2	4.4095e-13	4.14309e-13	4.14706e-08	1.94178	5.45891	5.12909	513401	0.00716403	0.00673119	673.764	2.3185e-15	2.17842e-15	2.18051e-10
NORWAY	578	Northern Europe	43786.6	8738.53	1.37448	53.9839	270.5	2363773	4.12937	20.6912	180811	2.42427e-11	1.21474e-10	1.06151e-06	1.63119	38.9899	195.369	1707236	0.130674	0.654774	5721.76	4.12014	20.645	180407	4.84853e-11	2.42948e-10	2.12301e-06	0.706949	14.994	75.1313	656537	0.00923145	0.0462565	404.214	1.6757e-16	8.3965e-16	7.3373e-12
PAKISTAN	586	Southern Asia	337220	103051	0.79937	92.8231	303.75	31301836	0.016925	0.0553845	5707.45	1.57637e-13	5.15845e-13	5.31585e-08	0.807327	78.7785	257.791	26565710	0.0904437	0.295963	30499.4	0.00694306	0.0227201	2341.34	1.97063e-14	6.44859e-14	6.64536e-09	0.754738	14.0446	45.9589	4736126	0.00998194	0.0326644	3366.11	2.95569e-13	9.67203e-13	9.96717e-08
PERU	604	South America	516187	243001	0.991326	74.8492	158.996	38636188	0.4056	0.861584	209366	5.57898e-13	1.1851e-12	2.8798e-07	1.02801	61.8669	131.419	31934892	0.416088	0.883863	214779	0.284687	0.604739	146952	6.9028e-13	1.46631e-12	3.56314e-07	0.816496	12.9823	27.5773	6701296	0.120913	0.256845	62413.6	4.25517e-13	9.03891e-13	2.19646e-07
PHILIPPINES	608	South-eastern Asia	14478.4	5391.39	1.60688	46.1766	124.005	668561	4.61637	12.3971	66837.5	2.76699e-12	7.43064e-12	4.00615e-08	1.77044	35.9232	96.4704	520110	0.0582586	0.156451	843.489	4.60143	12.357	66621.2	5.2839e-12	1.41897e-11	7.65022e-08	1.03381	10.2533	27.5349	148452	0.0149402	0.0401214	216.31	2.50078e-13	6.71574e-13	3.62072e-09
POLAND	616	Eastern Europe	4207076	1.1174e+06	2.36851	31.3277	117.95	131798088	4.65986	17.5446	19604400	1.82175e-11	6.85897e-11	7.66425e-05	2.40658	26.4275	99.5008	111182648	0.038128	0.143553	160407	4.65771	17.5365	19595320	3.64349e-11	1.37179e-10	0.000153285	2.16318	4.90018	18.4494	20615440	0.00215839	0.00812644	9080.53	1.01161e-16	3.80874e-16	4.2559e-10
PORTUGAL	620	Southern Europe	234414	74974.1	1.45573	50.9709	159.366	11948311	0.906294	2.83362	212448	4.23859e-12	1.32524e-11	9.93587e-07	1.66208	38.2652	119.64	8969918	0.131271	0.410432	30771.8	0.885417	2.76835	207554	8.45575e-12	2.64378e-11	1.98215e-06	0.834273	12.7057	39.7256	2.97839e+06	0.0208767	0.0652732	4893.8	2.14378e-14	6.70276e-14	5.02533e-09
ROMANIA	642	Eastern Europe	782399	272908	2.07812	35.7054	102.364	27935898	1.73888	4.98518	1.3605e+06	3.99073e-12	1.1441e-11	3.12234e-06	2.17434	29.2503	83.8574	22885374	0.124272	0.356275	97230.3	1.72649	4.94966	1.3508e+06	7.98075e-12	2.288e-11	6.24413e-06	1.64209	6.45518	18.5063	5.05052e+06	0.0123873	0.0355131	9691.83	7.12853e-16	2.04368e-15	5.57736e-10
RUSSIA	643	Eastern Europe	6598996	3.22563e+06	2.85442	25.9948	53.1801	171539328	0.849428	1.73776	5605369	1.93766e-12	3.96407e-12	1.27866e-05	2.96996	21.4144	43.8096	141313744	0.238116	0.487138	1.57133e+06	0.832668	1.70347	5494774	3.87389e-12	7.9252e-12	2.55638e-05	2.31424	4.58033	9.37044	30225582	0.0167594	0.0342863	110595	1.44124e-15	2.94849e-15	9.51075e-09
RWANDA	646	Eastern Africa	103778	67957.2	4.47405	16.5845	25.3265	1.72112e+06	0.0303745	0.0463853	3152.22	1.48203e-14	2.26323e-14	1.53803e-09	4.59095	13.8533	21.1556	1437677	0.0871945	0.133156	9048.9	0	0	0	0	0	0	3.88109	2.73119	4.17084	283439	0.0303745	0.0463853	3152.22	2.96406e-14	4.52646e-14	3.07606e-09
SAUDI ARABIA	682	Western Asia	74056.1	15584.6	1.16435	63.7268	302.821	4.71935e+06	0.0447912	0.212842	3317.06	7.37168e-14	3.50292e-13	5.45918e-09	1.24678	51.0112	242.398	3.77769e+06	0.00570887	0.0271278	422.777	0.0388771	0.184739	2879.08	1.47416e-13	7.00501e-13	1.09171e-08	0.833627	12.7155	60.4224	941662	0.00591419	0.0281034	437.981	1.75078e-17	8.31947e-17	1.29656e-12
SERBIA	688	Southern Europe	184334	94899.6	1.07965	68.7262	133.495	12668601	4.52445	8.78835	834011	9.44648e-12	1.8349e-11	1.74131e-06	1.06728	59.5907	115.75	10984616	0.467723	0.908512	86217.5	4.47722	8.69661	825305	1.88627e-11	3.66391e-11	3.47704e-06	1.16031	9.13549	17.7449	1.68398e+06	0.0472297	0.0917397	8706.06	3.03143e-14	5.88828e-14	5.58796e-09
SLOVAKIA	703	Eastern Europe	87576.8	27433.5	1.87735	39.5237	126.173	3.46136e+06	2.4153	7.71042	211524	6.12103e-12	1.95404e-11	5.3606e-07	1.89419	33.5764	107.187	2940516	0.296524	0.946602	25968.6	2.38033	7.59881	208462	1.22248e-11	3.90258e-11	1.07061e-06	1.78233	5.94728	18.9857	520844	0.0349631	0.111614	3061.96	1.72172e-14	5.49631e-14	1.50783e-09
VIET NAM	704	South-eastern Asia	68996.6	30114.6	1.18077	62.8404	143.976	4.33577e+06	2.47612	5.67312	170844	3.40382e-12	7.79862e-12	2.34852e-07	1.30885	48.5922	111.331	3.3527e+06	0.0676176	0.154921	4665.39	2.46457	5.64666	170047	6.61538e-12	1.51567e-11	4.56439e-07	0.743953	14.2482	32.6446	983078	0.0115464	0.0264544	796.662	1.92263e-13	4.40501e-13	1.32655e-08
SLOVENIA	705	Southern Europe	36311.5	8528.24	1.01658	72.9896	310.775	2650363	8.31468	35.4022	301919	1.33055e-11	5.66521e-11	4.83142e-07	1.1404	55.7699	237.457	2.02509e+06	0.316312	1.34679	11485.8	8.30622	35.3662	301611	2.66099e-11	1.133e-10	9.66246e-07	0.615571	17.2198	73.3183	625276	0.00846151	0.0360274	307.25	1.05586e-15	4.49563e-15	3.83398e-11
SOUTH AFRICA	710	Southern Africa	331328	52329.4	1.61373	45.9805	291.13	15234655	0.0869648	0.550626	28813.9	2.78122e-13	1.76096e-12	9.21498e-08	1.82546	34.8405	220.596	11543647	0.17965	1.13747	59523.2	0.0805245	0.509849	26680.1	1.38691e-13	8.78134e-13	4.59522e-08	0.951524	11.14	70.5342	3.69101e+06	0.00644032	0.0407775	2133.86	4.17554e-13	2.64378e-12	1.38347e-07
ZIMBABWE	716	Eastern Africa	7019.1	1846.13	7.60455	9.75731	37.0978	68487.5	0.0161537	0.0614173	113.385	4.37944e-14	1.66509e-13	3.07397e-10	8.13471	7.81835	29.7258	54877.8	0.0275075	0.104585	193.078	0.00719561	0.0273581	50.5067	1.88948e-14	7.18392e-14	1.32625e-10	5.46684	1.93896	7.37205	13609.8	0.0089581	0.0340592	62.8778	6.86939e-14	2.61178e-13	4.82169e-10
SPAIN	724	Southern Europe	644154	119436	1.49595	49.6006	267.511	31950448	3.1789	17.1448	2047702	8.49223e-12	4.58012e-11	5.47031e-06	1.60207	39.6985	214.106	25571972	2.03552	10.9782	1.31119e+06	3.1558	17.0202	2.03282e+06	1.69086e-11	9.11934e-11	1.08918e-05	1.07048	9.9021	53.405	6378475	0.0231005	0.124588	14880.3	7.58262e-14	4.08954e-13	4.88438e-08
SWEDEN	752	Northern Europe	170791	25463.7	2.42134	30.6442	205.538	5233748	6.89118	46.2207	1.17695e+06	3.87987e-11	2.60231e-10	6.62646e-06	2.59069	24.5494	164.658	4192811	0.0105405	0.0706971	1800.21	6.88975	46.2111	1.17671e+06	7.75974e-11	5.20463e-10	1.32529e-05	1.73918	6.09481	40.8793	1.04094e+06	0.00142831	0.00957999	243.942	1.02518e-17	6.87612e-17	1.75092e-12
SWITZERLAND	756	Western Europe	113364	13623.6	2.35457	31.5132	262.226	3.57245e+06	2.20594	18.3559	250073	3.99826e-12	3.32701e-11	4.53256e-07	2.35003	27.0635	225.199	3068009	0.258823	2.15371	29341.1	2.16933	18.0513	245923	7.99218e-12	6.65041e-11	9.06022e-07	2.38217	4.44973	37.0268	504437	0.0366015	0.304566	4149.28	4.33135e-15	3.60417e-14	4.91017e-10
SYRIA	760	Western Asia	93562.2	21902.5	3.71276	19.9851	85.3718	1.86985e+06	0.930401	3.97445	87050.3	5.18334e-13	2.2142e-12	4.84964e-08	3.83641	16.578	70.8174	1.55108e+06	0.0268959	0.114893	2516.44	0.927944	3.96396	86820.4	9.63388e-13	4.11537e-12	9.01367e-08	3.11114	3.40711	14.5544	318777	0.00245687	0.0104952	229.87	7.32794e-14	3.13032e-13	6.85618e-09
TAJIKISTAN	762	Central Asia	57175.7	21385.9	4.51842	16.4217	43.9038	938920	0.269541	0.720625	15411.2	1.25584e-13	3.35753e-13	7.18036e-09	4.40923	14.4243	38.5637	824718	0.873431	2.33514	49939.1	0.000590731	0.00157933	33.7754	1.75142e-15	4.68248e-15	1.00139e-10	5.30692	1.99739	5.34008	114202	0.26895	0.719046	15377.4	2.49417e-13	6.66823e-13	1.42606e-08
THAILAND	764	South-eastern Asia	19877.8	6958.72	0.947099	78.3445	223.794	1.55732e+06	2.0134	5.75136	40022.1	7.04983e-12	2.01381e-11	1.40135e-07	0.90708	70.1151	200.286	1.39373e+06	0.131327	0.375141	2610.5	2.00699	5.73303	39894.5	1.40503e-11	4.01352e-11	2.79289e-07	1.28807	8.22939	23.5076	163582	0.0064163	0.0183284	127.542	4.93432e-14	1.4095e-13	9.80835e-10
TUNISIA	788	Northern Africa	53845.7	19029.3	2.00537	37.0006	104.698	1.99232e+06	1.74646	4.94183	94039.5	8.21774e-13	2.32531e-12	4.42489e-08	2.10363	30.2334	85.5492	1.62794e+06	0.0938918	0.265679	5055.67	1.72474	4.88036	92869.7	1.54788e-12	4.37992e-12	8.33467e-08	1.56638	6.76719	19.1486	364384	0.0217258	0.0614759	1169.84	9.5665e-14	2.70696e-13	5.15114e-09
TURKEY	792	Western Asia	1.09841e+06	199241	1.2499	59.3647	327.276	65206844	9.68914	53.416	10642660	1.4932e-11	8.23199e-11	1.64015e-05	1.20741	52.6747	290.394	57858432	1.09032	6.01091	1.19762e+06	9.65091	53.2052	10600659	2.96205e-11	1.63297e-10	3.25355e-05	1.58444	6.69004	36.882	7348412	0.0382377	0.210803	42000.7	2.43547e-13	1.34267e-12	2.67515e-07
TURKMENISTAN	795	Central Asia	17801.8	14376.1	1.33587	55.5444	68.7801	988788	0.00094512	0.00117033	16.8248	3.78716e-16	4.68961e-16	6.74182e-12	1.17484	54.135	67.0349	963700	0.00565472	0.00700218	100.664	0	0	0	0	0	0	7.52127	1.40934	1.74517	25088.7	0.00094512	0.00117033	16.8248	7.57432e-16	9.37921e-16	1.34836e-11
UGANDA	800	Eastern Africa	93511.4	64796.3	2.59408	28.6036	41.2796	2.67477e+06	0.0257647	0.0371825	2409.29	2.81894e-15	4.06817e-15	2.63603e-10	2.70619	23.5017	33.9166	2197674	0.0265642	0.0383364	2484.06	8.67955e-05	0.00012526	8.11637	1.61442e-16	2.32987e-16	1.50967e-11	2.07763	5.10198	7.36297	477093	0.0256779	0.0370573	2401.18	5.47643e-15	7.90336e-15	5.12109e-10
UKRAINE	804	Eastern Europe	3511723	1557399	2.62757	28.239	63.6752	99167624	1.00095	2.25702	3.51507e+06	2.54069e-12	5.72892e-12	8.92221e-06	2.58387	24.6142	55.5017	86438352	0.128298	0.289295	450547	0.993804	2.24089	3489965	5.08107e-12	1.14571e-11	1.78433e-05	2.9243	3.62479	8.17342	12729270	0.00714983	0.0161219	25108.2	3.18594e-16	7.18386e-16	1.11881e-09
MACEDONIA	807	Southern Europe	36109.1	13529	1.47034	50.4646	134.691	1.82223e+06	9.92677	26.4947	358446	6.08612e-12	1.6244e-11	2.19764e-07	1.5592	40.7903	108.87	1472898	0.44657	1.1919	16125.2	9.83977	26.2625	355305	1.19437e-11	3.1878e-11	4.31276e-07	1.09568	9.67436	25.821	349332	0.0869957	0.232193	3141.33	2.28527e-13	6.09943e-13	8.2519e-09
EGYPT	818	Northern Africa	394202	79599.5	0.691401	107.318	531.475	42305088	1.25452	6.21277	494533	7.15937e-13	3.54555e-12	2.82224e-07	0.647369	98.2438	486.535	38727896	0.00441217	0.0218505	1739.29	1.25344	6.20745	494110	1.42815e-12	7.07264e-12	5.62978e-07	1.16811	9.07452	44.9399	3.57719e+06	0.00107423	0.00531994	423.465	3.72723e-15	1.84585e-14	1.46928e-09
UK	826	Northern Europe	1.34291e+06	155112	2.29098	32.3879	280.405	43494132	1.36925	11.8545	1.83878e+06	8.10341e-12	7.01569e-11	1.08822e-05	2.62788	24.202	209.534	32501144	0.0117664	0.10187	15801.3	1.36824	11.8458	1.83743e+06	1.62067e-11	1.40313e-10	2.17641e-05	1.2949	8.18593	70.8715	10992987	0.00100574	0.00870744	1350.62	1.57537e-16	1.36391e-15	2.11558e-10
TANZANIA	834	Eastern Africa	42663.1	32660.4	6.39411	11.6044	15.1584	495080	0.169636	0.22159	7237.21	3.64623e-13	4.76294e-13	1.55559e-08	6.04842	10.5151	13.7355	448609	0.011246	0.0146902	479.787	0.155184	0.202712	6620.64	2.718e-13	3.55042e-13	1.15958e-08	9.73123	1.08928	1.42288	46471.9	0.014452	0.018878	616.565	4.57447e-13	5.97545e-13	1.95161e-08
USA	840	Northern America	4586924	536315	2.20256	33.688	288.123	154524496	0.171634	1.46793	787272	1.39304e-12	1.19142e-11	6.38978e-06	2.31039	27.5278	235.437	126268144	0.995565	8.51474	4566580	0.167128	1.42939	766604	2.78018e-12	2.37779e-11	1.27525e-05	1.72072	6.1602	52.6861	28256358	0.00450595	0.0385379	20668.4	5.907e-15	5.05207e-14	2.7095e-08
URUGUAY	858	South America	29319.2	9356.82	1.16731	63.5648	199.177	1.86367e+06	0.844867	2.64735	24770.8	1.69491e-12	5.31094e-12	4.96935e-08	1.35646	46.8867	146.918	1374681	0.0188307	0.0590051	552.1	0.843077	2.64175	24718.3	3.38436e-12	1.06047e-11	9.92266e-08	0.635567	16.678	52.2598	488986	0.00178923	0.00560649	52.4589	5.47027e-15	1.71409e-14	1.60384e-10
UZBEKISTAN	860	Central Asia	147921	50647.2	1.07612	68.9516	201.381	10199392	0.0157056	0.04587	2323.19	1.77924e-15	5.19647e-15	2.63187e-10	1.0111	62.9018	183.712	9304503	1.15667	3.37817	171095	0	0	0	0	0	0	1.75213	6.04977	17.6691	894889	0.0157056	0.04587	2323.19	3.55848e-15	1.03929e-14	5.26374e-10
VENEZUELA (BOLIVARIAN REPUBLIC OF)	862	South America	71484.5	19177.3	1.94814	38.0877	141.974	2.72268e+06	0.251987	0.939297	18013.2	1.53192e-12	5.71033e-12	1.09509e-07	2.03774	31.211	116.341	2.2311e+06	0.0671958	0.250477	4803.46	0.238724	0.889859	17065.1	2.39247e-13	8.9181e-13	1.71025e-08	1.54144	6.87669	25.6333	491577	0.0132627	0.0494377	948.08	2.8246e-12	1.05289e-11	2.01915e-07
YEMEN	887	Western Asia	46129.5	16787	3.99836	18.5576	50.9949	856053	0.888441	2.44137	40983.3	1.82252e-12	5.00814e-12	8.40718e-08	3.79666	16.7516	46.0321	772741	0.00267439	0.00734901	123.368	0.886382	2.43571	40888.3	3.64173e-12	1.00072e-11	1.67991e-07	5.86918	1.80604	4.96287	83311.8	0.0020591	0.00565826	94.9853	3.3073e-15	9.08822e-15	1.52564e-10

## Sheet: Potato_Country_Level
Country	Country	Sub Region	Dry Production	Crop Area	Nutrient Use Efficiency	Fertiliser Input N&P			Nutrient Loading (N&P) to Aquatic Receptors			Aquatic Species Richness Impact Freshwater and Marine Combined			Nutrient Use Efficiency	N Input			N Load Freshwater			N Load Marine			N Marine Demersal Species Richness impact			Nutrient Use Efficiency	P Input			P Load Freshwater			P Freshwater Fish Species Richness impact
Name	Code		per country	per country		Per Tonne Crop	Per Hectare	Total	Per Tonne Crop	Per Hectare	Total	Per Tonne Crop	Per Hectare	Total	Nitrogen	Per Tonne Crop	Per Hectare	Total	Per Tonne Crop	Per Hectare	Total	Per Tonne Crop	Per Hectare	Total	Per Tonne Crop	Per Hectare	Total	Phopshours	Per Tonne Crop	Per Hectare	Total	Per Tonne Crop	Per Hectare	Total	Per Tonne Crop	Per Hectare	Total
			Tonne	ha	%	kg/tonne crop	kg/ha	kg	kg/tonne crop	kg/ha	kg	PDF.yr/tonne crop	PDF.yr/ha	PDF.yr	%	kg/tonne crop	kg/ha	kg	kg/tonne crop	kg/ha	kg	kg/tonne crop	kg/ha	kg	PDF.yr/tonne crop	PDF.yr/ha	PDF.yr	%	kg/tonne crop	kg/ha	kg	kg/tonne crop	kg/ha	kg	PDF.yr/tonne crop	PDF.yr/ha	PDF.yr
Country	Country_Number	Region	Production	Crop Area (ha)	Nue	Input (kg/tonne crop)	Input (kg/ha)	Input Total (kg)	Load Freshwater (kg/tonne crop)	Load Freshwater (kg/ha)	Load Freshwater (kg)	Freshwater Fish Species Richness (PDF.yr/tonne crop)	Freshwater Fish Species Richness (PDF.yr/ha)	Total Freshwater Fish Species Richness (PDF.yr)	nue	N Input (kg/tonne crop)	N Input (kg/ha)	N Input Total (kg)	N Load Freshwater (kg/tonne crop)	N Load Freshwater (kg/ha)	N Load Total Freshwater kg	N Load Marine (kg/tonne crop)	N Load Marine (kg/ha)	N Load Total Marine (kg)	N Marine Demersal Species Richness (PDF.yr/tonne crop)	N Marine Demersal Species Richness (PDF.yr/ha)	N Marine Total Demersal Species Richness (PDF.yr)	pue	P Input (kg/tonne crop)	P Input (kg/ha)	P Input Total (kg)	P Load Freshwater (kg/tonne crop)	P Load Freshwater (kg/ha)	P Load Freshwater (kg)	P Freshwater Fish Species Richness (PDF.yr/tonne crop)	P Freshwater Fish Species Richness (PDF.yr/ha)	P Total Freshwater Fish Species Richness (PDF.yr)
ALGERIA	12	Northern Africa	25762.7	15058.9	314.48	11.7483	20.099	302668	0.580669	0.993408	14959.6	3.32137e-13	5.6822e-13	8.55675e-09	329.294	9.67221	16.5472	249182	0.388827	0.665206	10017.2	0.532675	0.911301	13723.2	4.99161e-13	8.53965e-13	1.28597e-08	245.462	2.07608	3.55176	53485.5	0.0479935	0.0821074	1236.44	1.65113e-13	2.82476e-13	4.25376e-09
ARGENTINA	32	South America	4941.27	4113.46	128.217	28.8153	34.6142	142384	0.080606	0.0968274	398.296	1.68751e-13	2.02711e-13	8.33846e-10	175.376	18.161	21.8158	89738.5	0.0170052	0.0204274	84.0272	0.0735991	0.0884104	363.673	3.3617e-13	4.03823e-13	1.66111e-09	47.8304	10.6543	12.7984	52645.9	0.00700692	0.00841702	34.6231	1.33199e-15	1.60004e-15	6.58171e-12
AUSTRALIA	36	Australia and New Zealand	1418216	1.3098e+06	66.2804	55.7419	60.3557	79054096	0.0202287	0.021903	28688.7	2.15791e-14	2.33652e-14	3.06038e-08	81.955	38.8628	42.0794	55115812	0.012847	0.0139104	18219.8	0.0148364	0.0160644	21041.2	3.05828e-14	3.31141e-14	4.33729e-08	30.1911	16.8792	18.2762	23938288	0.00539233	0.00583865	7647.49	1.25754e-14	1.36163e-14	1.78347e-08
AUSTRIA	40	Western Europe	119868	53720.3	35.6182	103.728	231.451	12433621	5.30619	11.8399	636041	1.21693e-11	2.71536e-11	1.4587e-06	35.8356	88.878	198.316	10653611	0.402082	0.897179	48196.7	5.28792	11.7991	633852	2.43323e-11	5.42933e-11	2.91665e-06	34.317	14.8498	33.1348	1780010	0.0182637	0.0407523	2189.23	6.2685e-15	1.39871e-14	7.51391e-10
BANGLADESH	50	Southern Asia	211734	314711	11.7079	315.566	212.309	66815928	18.2199	12.2581	3857764	1.7004e-11	1.14401e-11	3.60032e-06	11.3933	279.549	188.077	59189984	0.102004	0.0686273	21597.7	18.2161	12.2556	3856970	3.39337e-11	2.28302e-11	7.1849e-06	14.149	36.0167	24.2316	7625944	0.00375053	0.00252331	794.113	7.4373e-14	5.00373e-14	1.57473e-08
BELGIUM	56	Western Europe	4790.7	2674.27	24.226	152.505	273.199	730608	22.5034	40.3128	107807	1.32188e-10	2.36803e-10	6.33274e-07	24.2227	131.488	235.549	629922	0.394872	0.707376	1891.71	22.4838	40.2777	107713	2.64375e-10	4.73603e-10	1.26654e-06	24.2471	21.017	37.6499	100686	0.0196032	0.0351174	93.9132	1.32262e-15	2.36935e-15	6.33627e-12
BRAZIL	76	South America	33180.4	23224.2	72.0964	51.2452	73.214	1.70034e+06	0.119768	0.171112	3973.94	5.7294e-13	8.18559e-13	1.90104e-08	115.137	27.6627	39.5217	917859	0.051227	0.0731879	1699.73	0.0934513	0.133514	3100.75	4.30677e-13	6.15308e-13	1.429e-08	21.6092	23.5826	33.6924	782479	0.0263165	0.0375984	873.193	7.15203e-13	1.02181e-12	2.37307e-08
BULGARIA	100	Eastern Europe	10522	10269.2	300.969	12.2757	12.578	129165	0.915359	0.9379	9631.44	1.79387e-12	1.83804e-12	1.88752e-08	265.341	12.0034	12.299	126301	1.44889	1.48457	15245.2	0.874773	0.896314	9204.39	3.52645e-12	3.61329e-12	3.71054e-08	1871.92	0.272234	0.278937	2864.45	0.0405861	0.0415856	427.049	6.12867e-14	6.27959e-14	6.4486e-10
BELARUS	112	Eastern Europe	63561.8	88457.2	66.4384	55.6094	39.9588	3534638	0.403054	0.289619	25618.8	1.68175e-12	1.20844e-12	1.06895e-07	79.4869	40.0695	28.7924	2.54689e+06	0.0667774	0.0479836	4244.49	0.388111	0.278881	24669	3.3633e-12	2.41674e-12	2.13778e-07	32.7929	15.5399	11.1664	987747	0.0149432	0.0107376	949.818	1.9618e-16	1.40967e-16	1.24695e-11
CANADA	124	Northern America	5.91754e+06	4.64322e+06	49.9611	73.9495	94.2449	437599744	0.201025	0.256196	1.18958e+06	2.37825e-13	3.03096e-13	1.40734e-06	46.187	68.9588	87.8845	408067008	0.67114	0.855333	3.9715e+06	0.163122	0.20789	965280	4.70613e-13	5.99772e-13	2.78487e-06	102.11	4.99071	6.3604	29532752	0.0379037	0.0483063	224297	5.03775e-15	6.42035e-15	2.98111e-08
CHILE	152	South America	40145	15868.9	30.4869	121.186	306.577	4.86503e+06	0.331863	0.839548	13322.7	1.89456e-13	4.79285e-13	7.6057e-09	38.3417	83.0689	210.148	3334804	0.0913255	0.231035	3666.27	0.301492	0.762714	12103.4	1.61924e-13	4.09636e-13	6.50046e-09	13.3692	38.1174	96.4294	1.53022e+06	0.0303716	0.0768341	1219.27	2.16987e-13	5.48933e-13	8.71094e-09
CHINA	156	Eastern Asia	9276330	6877551	20.3258	181.769	245.167	1686151168	8.1162	10.947	75288528	1.79193e-11	2.41692e-11	0.000166225	20.7648	153.385	206.883	1422848768	1.03861	1.40086	9634489	8.02414	10.8228	74434560	3.50209e-11	4.72357e-11	0.000324866	17.9536	28.3843	38.2843	263302448	0.0920591	0.124168	853971	8.17616e-13	1.10279e-12	7.58448e-06
CROATIA	191	Southern Europe	22139.1	11533.8	59.5337	62.0589	119.122	1.37393e+06	2.93205	5.62807	64912.9	3.77195e-12	7.24024e-12	8.35074e-08	65.1398	48.8948	93.8534	1.08249e+06	0.0949346	0.182226	2101.76	2.91424	5.59386	64518.5	7.27354e-12	1.39615e-11	1.61029e-07	38.7113	13.1641	25.2684	291441	0.0178176	0.0342008	394.465	2.70366e-13	5.18967e-13	5.98566e-09
CZECHIA	203	Eastern Europe	538581	246075	32.6454	113.174	247.702	60953184	9.06015	19.8298	4879623	2.00287e-11	4.38366e-11	1.07871e-05	30.4335	104.654	229.056	56364860	0.644879	1.41144	347319	9.03214	19.7685	4.86453e+06	4.00558e-11	8.76695e-11	2.15733e-05	59.8172	8.51929	18.646	4588325	0.0280156	0.0613173	15088.6	1.72301e-15	3.77112e-15	9.27979e-10
DENMARK	208	Northern Europe	272406	102392	54.7198	67.5185	179.628	18392464	1.34746	3.58482	367057	8.03864e-12	2.13862e-11	2.18977e-06	54.5576	58.3787	155.312	15902708	0.00155541	0.00413805	423.703	1.34674	3.5829	366860	1.60772e-11	4.27721e-11	4.37952e-06	55.7558	9.13986	24.3159	2489755	0.000721597	0.00191975	196.567	1.11704e-16	2.97181e-16	3.04289e-11
ETHIOPIA	231	Eastern Africa	11536.6	14485.6	68.539	53.9051	42.931	621881	0.252896	0.201411	2917.56	3.47217e-13	2.7653e-13	4.0057e-09	75.6866	42.0814	33.5144	485476	0.045203	0.0360005	521.489	0.197341	0.157166	2276.64	5.77747e-13	4.60128e-13	6.66523e-09	43.0999	11.8237	9.4166	136405	0.0555552	0.0442452	640.918	1.16687e-13	9.29318e-14	1.34617e-09
ESTONIA	233	Northern Europe	32229	26268.6	58.857	62.7725	77.0157	2.0231e+06	3.44364	4.22501	110985	1.91954e-11	2.35508e-11	6.18647e-07	58.5033	54.4414	66.7943	1.75459e+06	0.0107728	0.0132172	347.197	3.43902	4.21934	110836	3.83892e-11	4.70998e-11	1.23724e-06	61.1682	8.33112	10.2215	268504	0.00462468	0.00567403	149.049	1.54161e-15	1.89141e-15	4.96846e-11
FINLAND	246	Northern Europe	77520.4	63572.6	31.9205	115.744	141.138	8972515	17.9218	21.8539	1.38931e+06	9.80733e-11	1.19591e-10	7.60268e-06	31.3696	101.531	123.808	7.87076e+06	0.275023	0.335364	21319.9	17.902	21.8298	1.38777e+06	1.96144e-10	2.39178e-10	1.52052e-05	35.8559	14.2124	17.3307	1.10175e+06	0.0197762	0.0241152	1533.06	2.56308e-15	3.12542e-15	1.98691e-10
FRANCE	250	Western Europe	3014871	1061509	44.2138	83.5622	237.331	251929264	2.20944	6.27518	6661163	6.96588e-12	1.97843e-11	2.10012e-05	41.6292	76.5089	217.299	230664368	0.0855384	0.242944	257887	2.20461	6.26146	6646601	1.39269e-11	3.95548e-11	4.19878e-05	72.2495	7.05334	20.0327	21264894	0.00483003	0.0137181	14561.9	4.85859e-15	1.37992e-14	1.4648e-08
GERMANY	276	Western Europe	2.90522e+06	979788	44.3279	83.347	247.136	242140928	14.436	42.8049	41939732	5.82645e-11	1.72763e-10	0.000169271	42.7938	74.4266	220.686	216225280	0.0994541	0.294896	288936	14.4295	42.7855	41920788	1.16529e-10	3.45524e-10	0.000338541	57.1275	8.92039	26.4503	25915656	0.00652093	0.0193355	18944.7	3.76197e-16	1.11548e-15	1.09293e-09
HUNGARY	348	Eastern Europe	149967	102218	42.1997	87.5504	128.448	13129676	2.46026	3.60952	368958	5.65489e-12	8.29646e-12	8.48048e-07	39.9049	79.8147	117.098	11969571	0.135917	0.199408	20383	2.45279	3.59855	367837	1.13074e-11	1.65894e-11	1.69574e-06	65.8761	7.73573	11.3493	1.1601e+06	0.00747508	0.0109669	1121.02	2.39034e-15	3.50694e-15	3.58473e-10
INDIA	356	Southern Asia	4657540	5691238	30.1583	122.507	100.256	570581056	1.81516	1.48548	8454201	1.43835e-12	1.17711e-12	6.69919e-06	32.2823	98.661	80.7412	459517504	0.0690377	0.0564984	321546	1.80528	1.47739	8408160	2.84377e-12	2.32725e-12	1.3245e-05	21.3705	23.846	19.5148	111063560	0.00988523	0.00808978	46040.8	3.29424e-14	2.69591e-14	1.53431e-07
IRELAND	372	Northern Europe	8186.14	3145.87	59.0604	62.5563	162.783	512095	0.65486	1.70407	5360.78	3.9833e-12	1.03653e-11	3.26079e-08	60.1703	52.9331	137.742	433318	0.0179448	0.0466958	146.899	0.65317	1.69967	5346.94	7.96468e-12	2.07256e-11	6.52e-08	52.9552	9.62323	25.0414	78777.1	0.00169024	0.00439833	13.8366	1.92026e-15	4.99688e-15	1.57195e-11
ITALY	380	Southern Europe	32215.9	30035.7	28.573	129.304	138.69	4165643	20.2004	21.6666	650772	1.13087e-11	1.21295e-11	3.6432e-07	29.5818	107.667	115.483	3.4686e+06	3.21186	3.445	103473	20.1651	21.6288	649637	2.06464e-11	2.2145e-11	6.65142e-07	23.5528	21.6365	23.207	697040	0.0352396	0.0377975	1135.27	1.971e-12	2.11406e-12	6.34974e-08
KAZAKHSTAN	398	Central Asia	5713.54	9353.33	205.291	17.9969	10.9935	102826	0.154897	0.0946197	885.01	1.60656e-13	9.81375e-14	9.17913e-10	196.992	16.1682	9.87644	92377.6	0.363128	0.221819	2074.75	0.120101	0.0733645	686.203	3.17632e-13	1.94027e-13	1.8148e-09	278.67	1.82869	1.11707	10448.3	0.0347958	0.0212552	198.807	3.6799e-15	2.24789e-15	2.10252e-11
LATVIA	428	Northern Europe	12147.6	9342.78	24.9322	148.186	192.674	1800111	25.2367	32.8133	306567	1.39952e-10	1.81968e-10	1.70009e-06	24.891	127.958	166.373	1.55439e+06	0.123242	0.160242	1497.1	25.234	32.8097	306534	2.79903e-10	3.63935e-10	3.40017e-06	25.1926	20.2282	26.301	245725	0.00272543	0.00354365	33.1075	4.4645e-16	5.80483e-16	5.42332e-12
LITHUANIA	440	Northern Europe	78777.6	54095.6	149.181	24.7659	36.0657	1950996	0.649338	0.945608	51153.2	3.05409e-12	4.44756e-12	2.40594e-07	160.87	19.7986	28.8321	1.55969e+06	0.00691815	0.0100747	544.995	0.64698	0.942175	50967.5	6.10812e-12	8.89503e-12	4.81182e-07	102.592	4.96723	7.2336	391306	0.00235734	0.00343291	185.706	6.19208e-17	9.01731e-17	4.87797e-12
MEXICO	484	Central America	8528.58	6231.15	63.0648	58.5842	80.1842	499640	0.223634	0.306088	1907.28	7.63136e-13	1.04451e-12	6.50847e-09	83.1438	38.3071	52.431	326706	0.094266	0.129022	803.955	0.183791	0.251555	1567.48	5.52168e-13	7.55753e-13	4.70921e-09	25.1318	20.2771	27.7532	172935	0.0398433	0.0545336	339.807	9.74105e-13	1.33326e-12	8.30773e-09
NEW ZEALAND	554	Australia and New Zealand	3701.73	2107.69	39.0165	94.6932	166.31	350529	1.40792	2.47272	5211.72	2.01736e-12	3.54309e-12	7.46771e-09	47.5531	66.9778	117.633	247934	0.0176048	0.0309193	65.1681	1.40444	2.46662	5198.86	4.03083e-12	7.07934e-12	1.4921e-08	18.3869	27.7154	48.6766	102595	0.00347485	0.00610288	12.863	3.88864e-15	6.82962e-15	1.43947e-11
NORWAY	578	Northern Europe	6871.72	4450.77	26.1406	141.336	218.214	971219	11.6218	17.9433	79861.6	6.82876e-11	1.05432e-10	4.69253e-07	26.637	119.571	184.61	821655	0.370508	0.572041	2546.03	11.5953	17.9024	79679.3	1.36575e-10	2.10863e-10	9.38503e-07	23.4136	21.7651	33.604	149564	0.0265308	0.040962	182.312	4.27298e-16	6.59722e-16	2.93627e-12
PAKISTAN	586	Southern Asia	266544	316493	12.056	306.454	258.089	81683288	0.152989	0.128844	40778.3	8.32389e-13	7.0102e-13	2.21868e-07	12.4067	256.716	216.201	68425944	0.257979	0.217265	68762.7	0.106305	0.0895276	28334.9	2.96267e-13	2.4951e-13	7.89681e-08	10.2457	49.738	41.8883	13257345	0.0466843	0.0393165	12443.4	1.36851e-12	1.15253e-12	3.64768e-07
POLAND	616	Eastern Europe	819907	424369	34.1935	108.05	208.759	88590760	17.3322	33.4869	14210808	7.08179e-11	1.36825e-10	5.80641e-05	34.3003	92.8564	179.404	76133600	0.0780588	0.150815	64000.9	17.3291	33.4809	14208223	1.41636e-10	2.73649e-10	0.000116128	33.5409	15.1934	29.3546	12457158	0.00315282	0.00609144	2585.01	9.26965e-17	1.79095e-16	7.60025e-11
ROMANIA	642	Eastern Europe	46296.8	46738.2	81.6597	45.2439	44.8166	2.09465e+06	0.777208	0.769868	35982.3	1.85809e-12	1.84054e-12	8.60236e-08	83.888	37.9673	37.6087	1757766	0.0288086	0.0285365	1333.75	0.769126	0.761862	35608.1	3.71496e-12	3.67987e-12	1.71991e-07	70.0331	7.27656	7.20784	336882	0.00808235	0.00800603	374.187	1.21867e-15	1.20716e-15	5.64206e-11
RUSSIA	643	Eastern Europe	120838	147112	143.977	25.6611	21.0782	3100839	0.287635	0.236265	34757.4	4.78948e-13	3.93411e-13	5.78753e-08	143.678	22.1676	18.2086	2.67869e+06	0.120693	0.0991379	14584.3	0.24423	0.200612	29512.3	9.53049e-13	7.8284e-13	1.15165e-07	145.871	3.4935	2.86958	422148	0.0434058	0.0356537	5245.08	4.84742e-15	3.98169e-15	5.85753e-10
SERBIA	688	Southern Europe	4478.23	3230.27	97.227	37.9997	52.6803	170172	1.33732	1.85397	5988.83	2.83594e-12	3.93155e-12	1.27e-08	93.9289	33.9086	47.0086	151851	0.170183	0.23593	762.117	1.27841	1.7723	5725.02	5.63294e-12	7.80912e-12	2.52256e-08	124.563	4.09111	5.67164	18321	0.0589097	0.0816683	263.811	3.8936e-14	5.39782e-14	1.74364e-10
SLOVAKIA	703	Eastern Europe	153044	90535.1	50.1219	73.7123	124.606	11281218	1.89818	3.20876	290506	4.53042e-12	7.65839e-12	6.93352e-07	48.344	65.882	111.37	10082845	0.152145	0.257192	23284.9	1.87646	3.17204	287181	9.05631e-12	1.53091e-11	1.38601e-06	65.0809	7.83026	13.2366	1.19837e+06	0.0217245	0.0367239	3324.8	4.51539e-15	7.633e-15	6.91054e-10
SPAIN	724	Southern Europe	45469.5	31852	37.8208	97.6871	139.451	4441781	6.78719	9.68887	308610	1.73666e-11	2.47912e-11	7.89651e-07	41.395	76.9417	109.836	3498498	5.03353	7.18548	228872	6.71476	9.58547	305317	3.43982e-11	4.91042e-11	1.56407e-06	24.5645	20.7454	29.6145	943283	0.0724328	0.103399	3293.48	3.35033e-13	4.78267e-13	1.52338e-08
SWEDEN	752	Northern Europe	101863	50175.8	32.1257	115.005	233.474	11714732	16.8027	34.1116	1.71158e+06	9.44482e-11	1.91742e-10	9.62079e-06	30.6366	103.961	211.053	10589744	0.039104	0.079386	3983.25	16.7953	34.0965	1.71082e+06	1.88896e-10	3.83483e-10	1.92416e-05	46.1422	11.0441	22.4209	1.12499e+06	0.00745242	0.0151294	759.127	5.13834e-17	1.04315e-16	5.23407e-12
SWITZERLAND	756	Western Europe	39512.3	14427.4	39.545	93.4278	255.871	3691543	4.547	12.4529	179662	7.99984e-12	2.19092e-11	3.16092e-07	38.9597	81.7512	223.892	3.23017e+06	0.514938	1.41026	20346.4	4.44294	12.1679	175551	1.59872e-11	4.37843e-11	6.31692e-07	43.6428	11.6766	31.9788	461370	0.104057	0.284982	4111.53	1.24435e-14	3.40791e-14	4.91672e-10
UKRAINE	804	Eastern Europe	88740.3	101565	114.573	32.2467	28.1748	2.86158e+06	0.713441	0.623352	63311	1.80379e-12	1.57602e-12	1.60069e-07	102.932	30.9428	27.0355	2.74587e+06	0.0583709	0.0510001	5179.85	0.699537	0.611204	62077.1	3.60497e-12	3.14976e-12	3.19906e-07	390.813	1.30395	1.13929	115713	0.0139045	0.0121487	1233.89	2.61192e-15	2.28211e-15	2.31783e-10
UK	826	Northern Europe	1.25465e+06	449886	39.9486	92.4838	257.921	116034824	3.26059	9.0932	4090901	1.93042e-11	5.38358e-11	2.422e-05	38.3189	83.1182	231.801	104284168	0.0299417	0.0835019	37566.3	3.25805	9.0861	4087710	3.8608e-11	1.07671e-10	4.84396e-05	54.4114	9.36569	26.1192	11750654	0.00254328	0.00709276	3190.93	3.06843e-16	8.55729e-16	3.84981e-10
USA	840	Northern America	641402	470453	28.1702	131.153	178.81	84121688	0.623665	0.850286	400020	9.53681e-13	1.30022e-12	6.11693e-07	29.0184	109.758	149.641	70398976	1.2201	1.66345	782577	0.603653	0.823002	387184	1.90467e-12	2.59677e-12	1.22166e-06	23.8188	21.3949	29.1691	13722715	0.0200122	0.0272841	12835.9	2.68999e-15	3.66746e-15	1.72537e-09
INDIA	356	Southern Asia	4.82829e+06	1.26992e+06	1.5986	46.4157	176.474	224108496	0.160901	0.611751	776877	2.4169e-13	9.18911e-13	1.16695e-06	1.58128	40.2206	152.92	194196544	0.0859467	0.326772	414976	0.156135	0.593631	753866	4.25002e-13	1.61587e-12	2.05203e-06	1.71102	6.19514	23.5541	29911956	0.00476583	0.0181198	23010.8	5.83772e-14	2.21952e-13	2.81862e-07
INDONESIA	360	South-eastern Asia	191856	60165.8	2.02825	36.5833	116.657	7018735	0.290982	0.92788	55826.7	4.95876e-13	1.58125e-12	9.51371e-08	2.0278	31.3641	100.014	6.0174e+06	0.0224373	0.071548	4304.74	0.288586	0.920242	55367.1	5.46679e-13	1.74325e-12	1.04884e-07	2.03098	5.21917	16.6428	1.00133e+06	0.00239529	0.00763809	459.552	4.45073e-13	1.41925e-12	8.53902e-08
IRAN	364	Southern Asia	737515	162979	2.11952	35.0079	158.419	25818868	0.0575751	0.26054	42462.5	2.23132e-13	1.00973e-12	1.64564e-07	2.33641	27.2213	123.182	20076088	0.108058	0.488986	79694.2	0.0360048	0.16293	26554.1	2.59009e-14	1.17208e-13	1.91023e-08	1.3613	7.78666	35.2364	5.74278e+06	0.0215703	0.0976104	15908.4	4.20364e-13	1.90224e-12	3.10025e-07
IRAQ	368	Western Asia	84691.9	25511.3	0.496026	149.589	496.601	12668959	0.0693979	0.230385	5877.44	4.69885e-14	1.55991e-13	3.97955e-09	0.521538	121.947	404.836	10327924	0.371561	1.2335	31468.2	0.0235514	0.0781853	1994.61	8.33962e-14	2.76857e-13	7.06298e-09	0.383477	27.6418	91.7645	2.34104e+06	0.0458465	0.1522	3882.83	1.05808e-14	3.51259e-14	8.96109e-10
IRELAND	372	Northern Europe	104737	15792.6	1.56615	47.3774	314.208	4.96216e+06	0.166515	1.10433	17440.3	1.41118e-12	9.35896e-12	1.47802e-07	2.03916	31.1894	206.848	3.26667e+06	0.0122516	0.081253	1283.2	0.165411	1.09701	17324.6	2.82103e-12	1.87091e-11	2.95465e-07	0.654804	16.1881	107.359	1695485	0.00110443	0.0073246	115.675	1.33398e-15	8.84697e-15	1.39717e-10
ISRAEL	376	Western Asia	25093.3	3809.53	0.772946	95.9964	632.326	2408868	0.0682216	0.449374	1711.91	2.56406e-11	1.68894e-10	6.43409e-07	0.918393	69.2514	456.157	1.73775e+06	0.0137885	0.0908243	345.998	0.0601146	0.395974	1508.48	5.54341e-14	3.65143e-13	1.39103e-09	0.396336	26.745	176.169	671121	0.008107	0.0534006	203.431	5.12258e-11	3.37424e-10	1.28543e-06
ITALY	380	Southern Europe	361266	68830.9	1.88352	39.3942	206.764	14231777	0.0510467	0.267923	18441.4	1.11237e-13	5.83838e-13	4.01861e-08	2.05092	31.0104	162.761	11202994	0.0439156	0.230495	15865.2	0.0451956	0.237213	16327.6	9.35509e-14	4.9101e-13	3.37967e-08	1.26434	8.38382	44.0032	3.02878e+06	0.0058511	0.03071	2113.8	1.28923e-13	6.76666e-13	4.65755e-08
JAPAN	392	Eastern Asia	608348	90011.5	1.51079	49.1134	331.936	29878068	0.342385	2.31403	208289	7.66253e-13	5.17876e-12	4.66149e-07	2.00143	31.7772	214.768	19331616	0.154734	1.04578	94132.1	0.286084	1.93352	174039	1.36801e-12	9.2458e-12	8.32229e-07	0.611437	17.3362	117.168	10546451	0.0563005	0.38051	34250.3	1.64491e-13	1.11172e-12	1.00068e-07
KAZAKHSTAN	398	Central Asia	362814	154361	11.3247	6.55206	15.4001	2.37717e+06	0.0387712	0.0911289	14066.7	3.25943e-14	7.66106e-14	1.18257e-08	11.6373	5.4652	12.8455	1.98285e+06	0.110894	0.260649	40233.9	0.0137686	0.0323622	4995.45	6.43972e-14	1.51361e-13	2.33642e-08	9.75287	1.08686	2.55458	394327	0.0250026	0.0587668	9071.28	7.91476e-16	1.86031e-15	2.87158e-10
JORDAN	400	Western Asia	20597.2	3685.84	0.664947	111.588	623.574	2298394	0.016476	0.0920712	339.36	5.07007e-15	2.83325e-14	1.04429e-10	0.784911	81.0283	452.801	1.66895e+06	0.00516537	0.028865	106.392	0.0161861	0.0904511	333.388	0	0	0	0.346864	30.5596	170.773	629441	0.000289919	0.00162012	5.97151	1.01401e-14	5.66649e-14	2.08858e-10
KENYA	404	Eastern Africa	187025	112537	1.43356	51.7591	86.0184	9680256	0.0243818	0.0405201	4560.01	9.54419e-14	1.58615e-13	1.785e-08	1.74832	36.3779	60.4563	6.80357e+06	0.0313753	0.0521426	5867.97	0.0114125	0.0189664	2134.42	5.88623e-14	9.78231e-14	1.10087e-08	0.689149	15.3813	25.5621	2876684	0.0129694	0.0215538	2425.59	1.32022e-13	2.19406e-13	2.46913e-08
N. KOREA	408	Eastern Asia	349761	162862	1.16675	63.5954	136.577	22243218	0.859887	1.84668	300755	8.76689e-12	1.88277e-11	3.06632e-06	1.19842	53.0699	113.972	18561796	0.64645	1.38831	226103	0.740919	1.59119	259145	1.74949e-11	3.75718e-11	6.11904e-06	1.00708	10.5255	22.6045	3.68142e+06	0.118968	0.255495	41610.5	3.88968e-14	8.35344e-14	1.36046e-08
S.KOREA	410	Eastern Asia	126277	23998.7	1.16378	63.7579	335.484	8.05117e+06	0.543306	2.85879	68607.2	9.38849e-12	4.94007e-11	1.18555e-06	1.27894	49.7288	261.665	6.27961e+06	0.193693	1.01918	24459	0.508405	2.67514	64200	1.86491e-11	9.81286e-11	2.35496e-06	0.755569	14.0292	73.8192	1.77156e+06	0.0349012	0.183644	4407.23	1.27861e-13	6.72784e-13	1.61459e-08
KYRGYZSTAN	417	Central Asia	214805	66233	8.00039	9.27455	30.0789	1.99222e+06	0.203947	0.661433	43808.7	5.97882e-15	1.93903e-14	1.28428e-09	7.45546	8.53067	27.6664	1.83243e+06	0.755761	2.45106	162341	0	0	0	0	0	0	14.2495	0.743887	2.41255	159790	0.203947	0.661433	43808.7	1.19576e-14	3.87806e-14	2.56856e-09
LAO PEOPLEâ€™S DEMOCRATIC REPUBLIC	418	South-eastern Asia	7290.21	5325.85	2.69484	27.5341	37.6895	200729	0.581539	0.796029	4239.54	1.23657e-12	1.69266e-12	9.01487e-09	2.91281	21.8346	29.8879	159179	0.129998	0.177945	947.71	0.549159	0.751707	4003.48	2.26538e-12	3.10093e-12	1.65151e-08	1.85983	5.69946	7.80161	41550.2	0.0323793	0.0443219	236.052	2.07767e-13	2.84399e-13	1.51467e-09
LEBANON	422	Western Asia	64353.5	14273.3	0.750848	98.8215	445.555	6359516	0.131834	0.594399	8484	1.79795e-10	8.10639e-10	1.15705e-05	0.932352	68.2146	307.558	4389850	0.39755	1.79243	25583.7	0.0753726	0.339831	4850.49	6.62866e-14	2.98865e-13	4.26578e-09	0.346326	30.607	137.997	1.96967e+06	0.0564617	0.254568	3633.51	3.59524e-10	1.62098e-09	2.31366e-05
LESOTHO	426	Southern Africa	17510	5008.44	3.3208	22.344	78.1171	391245	0.542464	1.89651	9498.56	3.2566e-11	1.13854e-10	5.70232e-07	3.61666	17.5853	61.48	307919	1.06467	3.72219	18642.4	0.00796224	0.0278368	139.419	3.69726e-14	1.2926e-13	6.47391e-10	2.22748	4.75874	16.637	83325.7	0.534501	1.86867	9359.14	6.5095e-11	2.27579e-10	1.13982e-06
LATVIA	428	Northern Europe	160435	55815.4	2.35022	31.5716	90.7489	5065186	0.222154	0.638556	35641.3	1.34257e-12	3.85906e-12	2.15395e-07	2.6863	23.6757	68.0531	3798413	0.026077	0.0749553	4183.66	0.220899	0.634948	35439.9	2.68493e-12	7.71754e-12	4.30757e-07	1.34248	7.89586	22.6958	1266773	0.00125532	0.00360828	201.398	2.05154e-16	5.89691e-16	3.29138e-11
LIBYA	434	Northern Africa	35885.5	8495.92	2.18128	34.0167	143.681	1.22071e+06	0.00584282	0.0246792	209.672	3.47554e-15	1.46802e-14	1.24722e-10	3.11327	20.4287	86.2877	733094	0.00200353	0.00846262	71.8977	0.0057615	0.0243357	206.754	6.93448e-15	2.92902e-14	2.48847e-10	0.7801	13.588	57.3937	487613	8.13167e-05	0.00034347	2.91809	1.6601e-17	7.01201e-17	5.95735e-13
LITHUANIA	440	Northern Europe	337091	111170	3.70565	20.0235	60.7154	6749732	0.14319	0.434182	48268	1.08015e-12	3.27524e-12	3.64109e-07	3.91468	16.2465	49.263	5476559	0.0146828	0.0445212	4949.42	0.142061	0.43076	47887.5	2.16028e-12	6.55043e-12	7.2821e-07	2.8065	3.77694	11.4525	1.27317e+06	0.00112873	0.00342256	380.486	2.02128e-17	6.12895e-17	6.81355e-12
MADAGASCAR	450	Eastern Africa	26463	21490	5.39542	13.7524	16.9348	363930	0.0907453	0.111745	2401.39	7.052e-14	8.68389e-14	1.86617e-09	5.45764	11.6534	14.3501	308384	0.0164233	0.0202239	434.611	0.085285	0.105021	2256.9	7.00844e-14	8.63026e-14	1.85465e-09	5.04999	2.09901	2.58474	55546.2	0.00546031	0.00672388	144.496	7.09555e-14	8.73753e-14	1.8777e-09
MALAWI	454	Eastern Africa	240760	98325.4	1.91785	38.6891	94.7341	9314770	0.051188	0.125339	12324	1.62738e-13	3.9848e-13	3.91807e-08	1.93857	32.8076	80.3327	7898749	0.01237	0.0302892	2978.2	0.0426834	0.104515	10276.4	2.06572e-13	5.05812e-13	4.97342e-08	1.80227	5.88147	14.4014	1.41602e+06	0.00850464	0.0208244	2047.57	1.18904e-13	2.91149e-13	2.86273e-08
MEXICO	484	Central America	313804	64572.8	1.5054	49.2893	239.531	15467193	0.197726	0.960887	62047.2	5.7832e-13	2.81046e-12	1.81479e-07	1.64059	38.7666	188.394	12165119	0.0580347	0.282031	18211.5	0.185258	0.900298	58134.8	1.00701e-12	4.89376e-12	3.16004e-07	1.00734	10.5227	51.1372	3.30207e+06	0.0124678	0.0605895	3912.43	1.4963e-13	7.27155e-13	4.69545e-08
MONGOLIA	496	Eastern Asia	14259	8533.11	10.003	7.41779	12.3953	105770	0.0380312	0.063551	542.287	4.37118e-14	7.30433e-14	6.23287e-10	9.0963	6.99186	11.6835	99696.9	0.137794	0.230257	1964.81	0.0147446	0.0246386	210.244	8.47219e-14	1.41572e-13	1.20805e-09	24.8867	0.42593	0.711739	6073.34	0.0232866	0.0389124	332.044	2.70167e-15	4.51455e-15	3.85232e-11
MOLDOVA	498	Eastern Europe	79226.8	56512.9	2.2043	33.6614	47.1908	2.66689e+06	0.120921	0.169522	9580.19	3.59169e-13	5.03529e-13	2.84559e-08	2.13543	29.7832	41.7538	2359629	0.118286	0.165828	9371.44	0.0966938	0.135557	7660.74	7.15375e-13	1.0029e-12	5.66769e-08	2.73321	3.87822	5.43698	307259	0.0242273	0.0339648	1919.45	2.96386e-15	4.15512e-15	2.34817e-10
MONTENEGRO	499	Southern Europe	12210	10243.6	0.704087	105.385	125.615	1.28675e+06	1.26481	1.50761	15443.4	5.69259e-13	6.7854e-13	6.95068e-09	0.688765	92.3391	110.065	1127465	3.03003	3.6117	36996.8	0.168441	0.200777	2056.67	4.55824e-13	5.43329e-13	5.56563e-09	0.812539	13.0455	15.5499	159287	1.09637	1.30684	13386.7	6.82694e-13	8.1375e-13	8.33572e-09
MOROCCO	504	Northern Africa	212650	60076.4	0.933114	79.5186	281.469	16909624	0.088953	0.314863	18915.8	1.60467e-13	5.67999e-13	3.41233e-08	0.911714	69.7587	246.922	14834167	0.393913	1.39432	83765.5	0.0562517	0.199112	11961.9	2.42159e-13	8.57159e-13	5.1495e-08	1.08607	9.75997	34.547	2.07546e+06	0.0327012	0.115751	6953.91	7.87757e-14	2.78839e-13	1.67516e-08
MOZAMBIQUE	508	Eastern Africa	12773.4	4306.62	21.9568	3.37936	10.0231	43165.9	0.0121081	0.0359126	154.662	3.57326e-14	1.05983e-13	4.56427e-10	19.6808	3.23157	9.58483	41278.2	0.00273742	0.00811916	34.9661	0.0102683	0.0304557	131.161	3.45691e-14	1.02532e-13	4.41565e-10	71.7271	0.147782	0.438321	1887.68	0.00183984	0.00545697	23.5011	3.68961e-14	1.09434e-13	4.71289e-10
NEPAL	524	Southern Asia	248545	121088	1.61069	46.0672	94.5577	11449795	0.492603	1.01112	122434	1.35641e-12	2.78417e-12	3.37129e-07	1.78039	35.7225	73.3241	8878657	0.202273	0.415186	50274	0.427439	0.877363	106238	1.13729e-12	2.3344e-12	2.82667e-07	1.02468	10.3447	21.2337	2571138	0.0651644	0.133757	16196.3	1.57553e-12	3.23394e-12	3.91591e-07
NETHERLANDS	528	Western Europe	1.34909e+06	144828	1.6444	45.1228	420.325	60874776	0.0880877	0.820548	118838	1.5807e-12	1.47244e-11	2.1325e-06	1.74416	36.4645	339.671	49193916	0.00560405	0.0522024	7560.37	0.0878611	0.818437	118533	3.16139e-12	2.94487e-11	4.265e-06	1.22426	8.65832	80.6534	11680858	0.000226583	0.00211065	305.681	4.21833e-18	3.92943e-17	5.69091e-12
NEW ZEALAND	554	Australia and New Zealand	103251	11376.6	1.42167	52.1922	473.682	5388874	0.250568	2.27409	25871.3	1.67016e-12	1.51579e-11	1.72445e-07	1.73357	36.6873	332.964	3787986	0.0107778	0.0978163	1112.81	0.249366	2.26318	25747.2	3.33907e-12	3.03045e-11	3.44761e-07	0.683656	15.5049	140.718	1.60089e+06	0.00120164	0.0109058	124.07	1.24587e-15	1.13071e-14	1.28637e-10
NIGERIA	566	Western Africa	94048.3	100096	2.31042	32.1154	30.175	3.02039e+06	0.1062	0.0997836	9987.93	1.33327e-13	1.25272e-13	1.25392e-08	2.38591	26.6565	25.0459	2.50699e+06	0.015281	0.0143577	1437.15	0.0989379	0.0929602	9304.94	2.64359e-13	2.48387e-13	2.48625e-08	1.94178	5.45891	5.12909	513401	0.00726216	0.0068234	682.994	2.2946e-15	2.15597e-15	2.15803e-10
NORWAY	578	Northern Europe	43786.6	8738.53	1.37448	53.9839	270.5	2363773	0.535858	2.68505	23463.4	8.25516e-12	4.13646e-11	3.61465e-07	1.63119	38.9899	195.369	1707236	0.131916	0.660998	5776.14	0.526442	2.63787	23051.1	1.65101e-11	8.27283e-11	7.22923e-07	0.706949	14.994	75.1313	656537	0.00941607	0.0471816	412.298	1.70138e-16	8.52519e-16	7.44976e-12
PAKISTAN	586	Southern Asia	337220	103051	0.79937	92.8231	303.75	31301836	0.0174557	0.0571211	5886.42	1.6315e-13	5.33885e-13	5.50176e-08	0.807327	78.7785	257.791	26565710	0.0982356	0.321461	33127	0.00741912	0.024278	2501.88	2.58178e-14	8.44848e-14	8.70628e-09	0.754738	14.0446	45.9589	4736126	0.0100366	0.0328432	3384.54	3.00483e-13	9.83285e-13	1.01329e-07
PERU	604	South America	516187	243001	0.991326	74.8492	158.996	38636188	0.836733	1.77741	431911	7.56052e-13	1.60602e-12	3.90264e-07	1.02801	61.8669	131.419	31934892	0.50206	1.06649	259157	0.720633	1.53078	371981	1.07866e-12	2.29132e-12	5.56793e-07	0.816496	12.9823	27.5773	6701296	0.116101	0.246623	59929.6	4.33439e-13	9.20721e-13	2.23736e-07
PHILIPPINES	608	South-eastern Asia	14478.4	5391.39	1.60688	46.1766	124.005	668561	0.683692	1.83603	9898.73	3.61921e-13	9.71923e-13	5.24002e-09	1.77044	35.9232	96.4704	520110	0.0588389	0.158009	851.891	0.668486	1.79519	9678.57	4.69344e-13	1.2604e-12	6.79532e-09	1.03381	10.2533	27.5349	148452	0.0152064	0.040836	220.163	2.54498e-13	6.83444e-13	3.68471e-09
POLAND	616	Eastern Europe	4207076	1.1174e+06	2.36851	31.3277	117.95	131798088	0.211143	0.794961	888293	1.6305e-12	6.13892e-12	6.85966e-06	2.40658	26.4275	99.5008	111182648	0.0392469	0.147766	165115	0.208932	0.786637	878992	3.26091e-12	1.22774e-11	1.37189e-05	2.16318	4.90018	18.4494	20615440	0.00221085	0.00832395	9301.22	1.0315e-16	3.88363e-16	4.33958e-10
PORTUGAL	620	Southern Europe	234414	74974.1	1.45573	50.9709	159.366	11948311	0.566371	1.77082	132765	3.2221e-12	1.00742e-11	7.55307e-07	1.66208	38.2652	119.64	8969918	0.13431	0.419933	31484.1	0.545125	1.70439	127785	6.42243e-12	2.00804e-11	1.50551e-06	0.834273	12.7057	39.7256	2.97839e+06	0.0212454	0.0664258	4980.21	2.17709e-14	6.80692e-14	5.10342e-09
ROMANIA	642	Eastern Europe	782399	272908	2.07812	35.7054	102.364	27935898	0.140477	0.402734	109909	3.75788e-13	1.07734e-12	2.94016e-07	2.17434	29.2503	83.8574	22885374	0.122978	0.352565	96217.9	0.127851	0.366536	100031	7.50849e-13	2.15261e-12	5.87464e-07	1.64209	6.45518	18.5063	5.05052e+06	0.0126262	0.036198	9878.72	7.26626e-16	2.08316e-15	5.68512e-10
RUSSIA	643	Eastern Europe	6598996	3.22563e+06	2.85442	25.9948	53.1801	171539328	0.0929075	0.19007	613096	2.47778e-13	5.06905e-13	1.63509e-06	2.96996	21.4144	43.8096	141313744	0.212445	0.43462	1.40193e+06	0.0759446	0.155367	501158	4.94317e-13	1.01127e-12	3.262e-06	2.31424	4.58033	9.37044	30225582	0.0169629	0.0347026	111938	1.23962e-15	2.53601e-15	8.18022e-09
RWANDA	646	Eastern Africa	103778	67957.2	4.47405	16.5845	25.3265	1.72112e+06	0.0311182	0.047521	3229.4	1.51595e-14	2.31503e-14	1.57323e-09	4.59095	13.8533	21.1556	1437677	0.0889962	0.135907	9235.88	0	0	0	0	0	0	3.88109	2.73119	4.17084	283439	0.0311182	0.047521	3229.4	3.0319e-14	4.63006e-14	3.14646e-09
SAUDI ARABIA	682	Western Asia	74056.1	15584.6	1.16435	63.7268	302.821	4.71935e+06	5.20794e-05	0.000247474	3.8568	7.60999e-16	3.61616e-15	5.63566e-11	1.24678	51.0112	242.398	3.77769e+06	3.15009e-05	0.000149688	2.33283	4.13918e-05	0.000196688	3.06532	1.51492e-15	7.19867e-15	1.12189e-10	0.833627	12.7155	60.4224	941662	1.06876e-05	5.07859e-05	0.79148	7.08272e-18	3.36561e-17	5.24518e-13
SERBIA	688	Southern Europe	184334	94899.6	1.07965	68.7262	133.495	12668601	0.457451	0.88856	84324	1.09385e-12	2.1247e-12	2.01634e-07	1.06728	59.5907	115.75	10984616	0.476156	0.924891	87771.8	0.409189	0.794814	75427.6	2.15669e-12	4.18918e-12	3.97551e-07	1.16031	9.13549	17.7449	1.68398e+06	0.0482627	0.0937461	8896.47	3.10094e-14	6.02331e-14	5.7161e-09
SLOVAKIA	703	Eastern Europe	87576.8	27433.5	1.87735	39.5237	126.173	3.46136e+06	0.284394	0.90788	24906.3	7.36084e-13	2.34982e-12	6.44639e-08	1.89419	33.5764	107.187	2940516	0.305166	0.97419	26725.4	0.248744	0.794074	21784.2	1.45461e-12	4.64359e-12	1.2739e-07	1.78233	5.94728	18.9857	520844	0.0356498	0.113806	3122.09	1.75591e-14	5.60546e-14	1.53777e-09
VIET NAM	704	South-eastern Asia	68996.6	30114.6	1.18077	62.8404	143.976	4.33577e+06	0.662689	1.51831	45723.3	2.69154e-12	6.1667e-12	1.85707e-07	1.30885	48.5922	111.331	3.3527e+06	0.0681637	0.156172	4703.06	0.650952	1.49142	44913.5	5.18807e-12	1.18866e-11	3.57959e-07	0.743953	14.2482	32.6446	983078	0.0117363	0.0268895	809.767	1.95016e-13	4.46809e-13	1.34555e-08
SLOVENIA	705	Southern Europe	36311.5	8528.24	1.01658	72.9896	310.775	2650363	0.576153	2.45314	20921	1.78743e-12	7.6105e-12	6.49041e-08	1.1404	55.7699	237.457	2.02509e+06	0.329054	1.40104	11948.4	0.567596	2.41671	20610.3	3.57378e-12	1.52165e-11	1.29769e-07	0.615571	17.2198	73.3183	625276	0.0085572	0.0364348	310.725	1.06816e-15	4.548e-15	3.87864e-11
SOUTH AFRICA	710	Southern Africa	331328	52329.4	1.61373	45.9805	291.13	15234655	0.0753474	0.47707	24964.7	2.75569e-13	1.74479e-12	9.13037e-08	1.82546	34.8405	220.596	11543647	0.0745989	0.472331	24716.8	0.0712044	0.450838	23592.1	1.33186e-13	8.43278e-13	4.41282e-08	0.951524	11.14	70.5342	3.69101e+06	0.00414297	0.0262316	1372.68	4.17952e-13	2.6463e-12	1.38479e-07
ZIMBABWE	716	Eastern Africa	7019.1	1846.13	7.60455	9.75731	37.0978	68487.5	0.0196284	0.0746281	137.773	6.50552e-14	2.47343e-13	4.56629e-10	8.13471	7.81835	29.7258	54877.8	0.0336098	0.127786	235.911	0.0117692	0.044747	82.6089	6.05568e-14	2.3024e-13	4.25054e-10	5.46684	1.93896	7.37205	13609.8	0.00785919	0.0298811	55.1644	6.95536e-14	2.64446e-13	4.88203e-10
SPAIN	724	Southern Europe	644154	119436	1.49595	49.6006	267.511	31950448	0.222323	1.19906	143210	2.08977e-12	1.12708e-11	1.34614e-06	1.60207	39.6985	214.106	25571972	0.314224	1.69471	202409	0.200022	1.07878	128845	4.10764e-12	2.21537e-11	2.64595e-06	1.07048	9.9021	53.405	6378475	0.0223008	0.120275	14365.2	7.19112e-14	3.87839e-13	4.63219e-08
SWEDEN	752	Northern Europe	170791	25463.7	2.42134	30.6442	205.538	5233748	0.380273	2.55058	64947.1	4.54376e-12	3.0476e-11	7.76031e-07	2.59069	24.5494	164.658	4192811	0.0107576	0.0721537	1837.3	0.378768	2.54048	64690.1	9.0875e-12	6.09519e-11	1.55206e-06	1.73918	6.09481	40.8793	1.04094e+06	0.00150484	0.0100933	257.012	1.04558e-17	7.0129e-17	1.78575e-12
SWITZERLAND	756	Western Europe	113364	13623.6	2.35457	31.5132	262.226	3.57245e+06	0.341697	2.84331	38736	8.2176e-13	6.83798e-12	9.31576e-08	2.35003	27.0635	225.199	3068009	0.264449	2.20052	29978.8	0.304387	2.53284	34506.3	1.63909e-12	1.36391e-11	1.85813e-07	2.38217	4.44973	37.0268	504437	0.0373105	0.310466	4229.65	4.42673e-15	3.68355e-14	5.0183e-10
SYRIA	760	Western Asia	93562.2	21902.5	3.71276	19.9851	85.3718	1.86985e+06	0.0205108	0.0876171	1919.03	7.36911e-14	3.14791e-13	6.8947e-09	3.83641	16.578	70.8174	1.55108e+06	0.0381736	0.163069	3571.6	0.018722	0.0799761	1751.67	7.25793e-14	3.10042e-13	6.79068e-09	3.11114	3.40711	14.5544	318777	0.00178874	0.00764107	167.358	7.4803e-14	3.19541e-13	6.99873e-09
TAJIKISTAN	762	Central Asia	57175.7	21385.9	4.51842	16.4217	43.9038	938920	0.275732	0.737177	15765.2	1.27627e-13	3.41214e-13	7.29715e-09	4.40923	14.4243	38.5637	824718	1.08682	2.90563	62139.4	0.000183262	0.000489955	10.4781	5.22513e-16	1.39695e-15	2.98751e-11	5.30692	1.99739	5.34008	114202	0.275549	0.736687	15754.7	2.54731e-13	6.81031e-13	1.45644e-08
THAILAND	764	South-eastern Asia	19877.8	6958.72	0.947099	78.3445	223.794	1.55732e+06	0.340836	0.973611	6775.08	6.6881e-13	1.91048e-12	1.32945e-08	0.90708	70.1151	200.286	1.39373e+06	0.134753	0.384925	2678.59	0.334292	0.954916	6644.99	1.28739e-12	3.67747e-12	2.55905e-08	1.28807	8.22939	23.5076	163582	0.00654438	0.0186942	130.088	5.02313e-14	1.43487e-13	9.98489e-10
TUNISIA	788	Northern Africa	53845.7	19029.3	2.00537	37.0006	104.698	1.99232e+06	0.0263538	0.0745715	1419.04	5.33986e-14	1.51098e-13	2.87529e-09	2.10363	30.2334	85.5492	1.62794e+06	0.0943588	0.267	5080.81	0.00419078	0.0118583	225.655	9.10619e-15	2.57671e-14	4.90329e-10	1.56638	6.76719	19.1486	364384	0.0221631	0.0627131	1193.39	9.76911e-14	2.76429e-13	5.26024e-09
TURKEY	792	Western Asia	1.09841e+06	199241	1.2499	59.3647	327.276	65206844	0.313973	1.73093	344872	7.90653e-13	4.35885e-12	8.68462e-07	1.20741	52.6747	290.394	57858432	0.726008	4.00246	797455	0.275371	1.51811	302470	1.33386e-12	7.35355e-12	1.46513e-06	1.58444	6.69004	36.882	7348412	0.0386026	0.212815	42401.6	2.47443e-13	1.36415e-12	2.71794e-07
TURKMENISTAN	795	Central Asia	17801.8	14376.1	1.33587	55.5444	68.7801	988788	0.000443589	0.000549292	7.89666	1.72914e-16	2.14117e-16	3.07817e-12	1.17484	54.135	67.0349	963700	0.00488573	0.00604996	86.9747	0	0	0	0	0	0	7.52127	1.40934	1.74517	25088.7	0.000443589	0.000549292	7.89666	3.45827e-16	4.28234e-16	6.15634e-12
UGANDA	800	Eastern Africa	93511.4	64796.3	2.59408	28.6036	41.2796	2.67477e+06	0.0258986	0.0373759	2421.82	2.85224e-15	4.11624e-15	2.66717e-10	2.70619	23.5017	33.9166	2197674	0.0307137	0.0443247	2872.08	6.47977e-05	9.35134e-05	6.05933	1.25387e-16	1.80953e-16	1.17251e-11	2.07763	5.10198	7.36297	477093	0.0258338	0.0372824	2415.76	5.5791e-15	8.05153e-15	5.2171e-10
UKRAINE	804	Eastern Europe	3511723	1557399	2.62757	28.239	63.6752	99167624	0.0648572	0.146244	227760	2.13211e-13	4.80762e-13	7.48738e-07	2.58387	24.6142	55.5017	86438352	0.165462	0.373094	581057	0.0575436	0.129753	202077	4.26097e-13	9.6079e-13	1.49633e-06	2.9243	3.62479	8.17342	12729270	0.0073136	0.0164912	25683.3	3.25361e-16	7.33645e-16	1.14258e-09
MACEDONIA	807	Southern Europe	36109.1	13529	1.47034	50.4646	134.691	1.82223e+06	0.186022	0.496495	6717.08	2.55499e-13	6.81931e-13	9.22584e-09	1.5592	40.7903	108.87	1472898	0.45054	1.2025	16268.6	0.0972626	0.259595	3512.06	2.7798e-13	7.41932e-13	1.00376e-08	1.09568	9.67436	25.821	349332	0.0887594	0.2369	3205.02	2.33019e-13	6.2193e-13	8.41408e-09
EGYPT	818	Northern Africa	394202	79599.5	0.691401	107.318	531.475	42305088	0.00335844	0.0166321	1323.9	8.60317e-15	4.26056e-14	3.39138e-09	0.647369	98.2438	486.535	38727896	0.00147047	0.00728222	579.661	0.0031247	0.0154745	1231.76	1.36126e-14	6.7414e-14	5.36612e-09	1.16811	9.07452	44.9399	3.57719e+06	0.000233737	0.00115754	92.1396	3.59372e-15	1.77973e-14	1.41665e-09
UK	826	Northern Europe	1.34291e+06	155112	2.29098	32.3879	280.405	43494132	0.159009	1.37665	213535	1.03256e-12	8.93964e-12	1.38664e-06	2.62788	24.202	209.534	32501144	0.0118029	0.102187	15850.3	0.157988	1.36781	212164	2.06497e-12	1.78779e-11	2.77307e-06	1.2949	8.18593	70.8715	10992987	0.00102097	0.00883928	1371.07	1.60008e-16	1.3853e-15	2.14876e-10
TANZANIA	834	Eastern Africa	42663.1	32660.4	6.39411	11.6044	15.1584	495080	0.0293505	0.0383394	1252.18	3.3242e-13	4.34228e-13	1.41821e-08	6.04842	10.5151	13.7355	448609	0.0112958	0.0147552	481.911	0.0146617	0.0191521	625.514	1.96624e-13	2.56843e-13	8.38859e-09	9.73123	1.08928	1.42288	46471.9	0.0146888	0.0191874	626.668	4.68216e-13	6.11612e-13	1.99755e-08
USA	840	Northern America	4586924	536315	2.20256	33.688	288.123	154524496	0.0703628	0.60179	322749	5.95745e-13	5.09521e-12	2.73264e-06	2.31039	27.5278	235.437	126268144	0.0928179	0.793841	425749	0.0670396	0.573367	307506	1.18579e-12	1.01417e-11	5.43914e-06	1.72072	6.1602	52.6861	28256358	0.00332325	0.0284227	15243.5	5.69804e-15	4.87334e-14	2.61365e-08
URUGUAY	858	South America	29319.2	9356.82	1.16731	63.5648	199.177	1.86367e+06	0.121443	0.380538	3560.62	4.33901e-13	1.35961e-12	1.27216e-08	1.35646	46.8867	146.918	1374681	0.0188803	0.0591607	553.556	0.119624	0.374836	3507.27	8.62213e-13	2.70171e-12	2.52794e-08	0.635567	16.678	52.2598	488986	0.00181973	0.00570204	53.3529	5.58824e-15	1.75105e-14	1.63843e-10
UZBEKISTAN	860	Central Asia	147921	50647.2	1.07612	68.9516	201.381	10199392	0.0159754	0.0466579	2363.09	1.77283e-15	5.17776e-15	2.62239e-10	1.0111	62.9018	183.712	9304503	0.237262	0.69295	35096	0	0	0	0	0	0	1.75213	6.04977	17.6691	894889	0.0159754	0.0466579	2363.09	3.54566e-15	1.03555e-14	5.24478e-10
VENEZUELA (BOLIVARIAN REPUBLIC OF)	862	South America	71484.5	19177.3	1.94814	38.0877	141.974	2.72268e+06	0.0723337	0.269628	5170.74	1.59147e-12	5.9323e-12	1.13765e-07	2.03774	31.211	116.341	2.2311e+06	0.0677457	0.252526	4842.77	0.0588052	0.2192	4203.66	3.03566e-13	1.13156e-12	2.17003e-08	1.54144	6.87669	25.6333	491577	0.0135285	0.0504284	967.079	2.87937e-12	1.0733e-11	2.05831e-07
YEMEN	887	Western Asia	46129.5	16787	3.99836	18.5576	50.9949	856053	0.12477	0.34286	5755.59	3.59192e-13	9.87032e-13	1.65693e-08	3.79666	16.7516	46.0321	772741	0.00270078	0.00742155	124.586	0.122705	0.337185	5660.34	7.15045e-13	1.96489e-12	3.29846e-08	5.86918	1.80604	4.96287	83311.8	0.00206502	0.00567451	95.2582	3.33862e-15	9.17427e-15	1.54009e-10

[truncated: 9 more sheets: Rapeseed_Country_Level, Rice_Country_Level, Rye_Country_Level, Sorghum_Country_Level, Soybean_Country_Level, Sugarbeet_Country_Level, Sugarcane_Country_Level, Sunflower_Country_Level, Wheat_Country_Level]
